# Supplementary material
Source: PubMed Central journal article supplement (PMC2689138)
Supplement: JCI38248sd.pdf [file JCI38248sd.pdf]

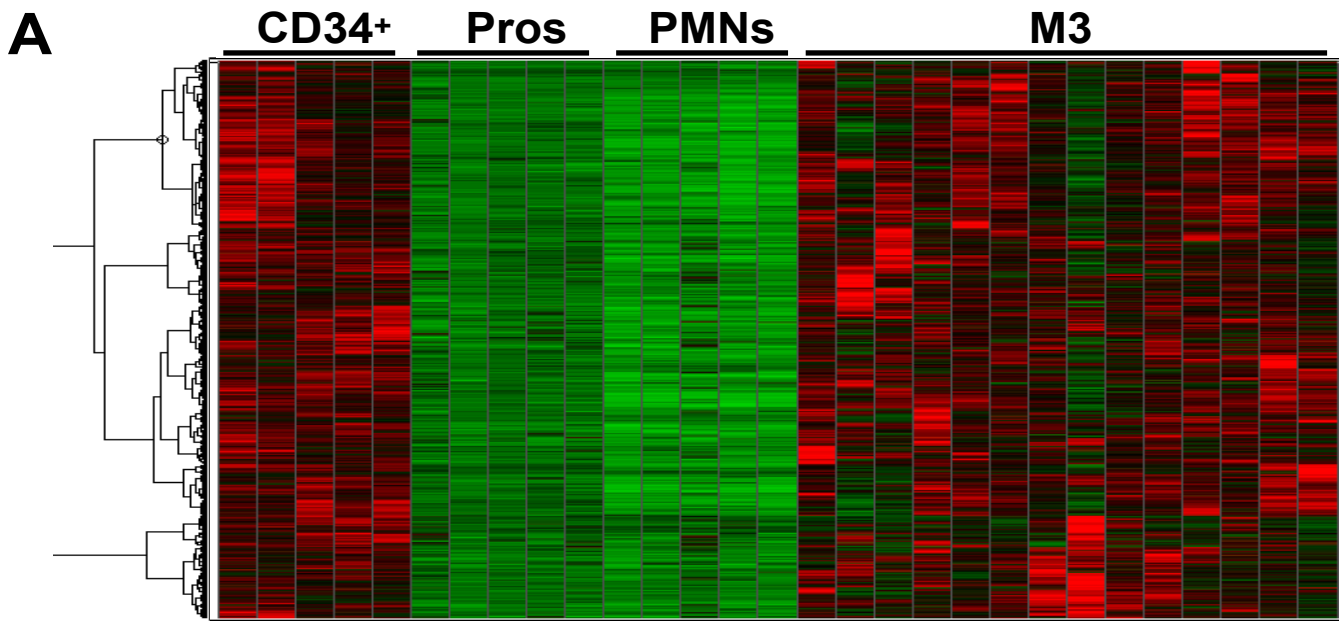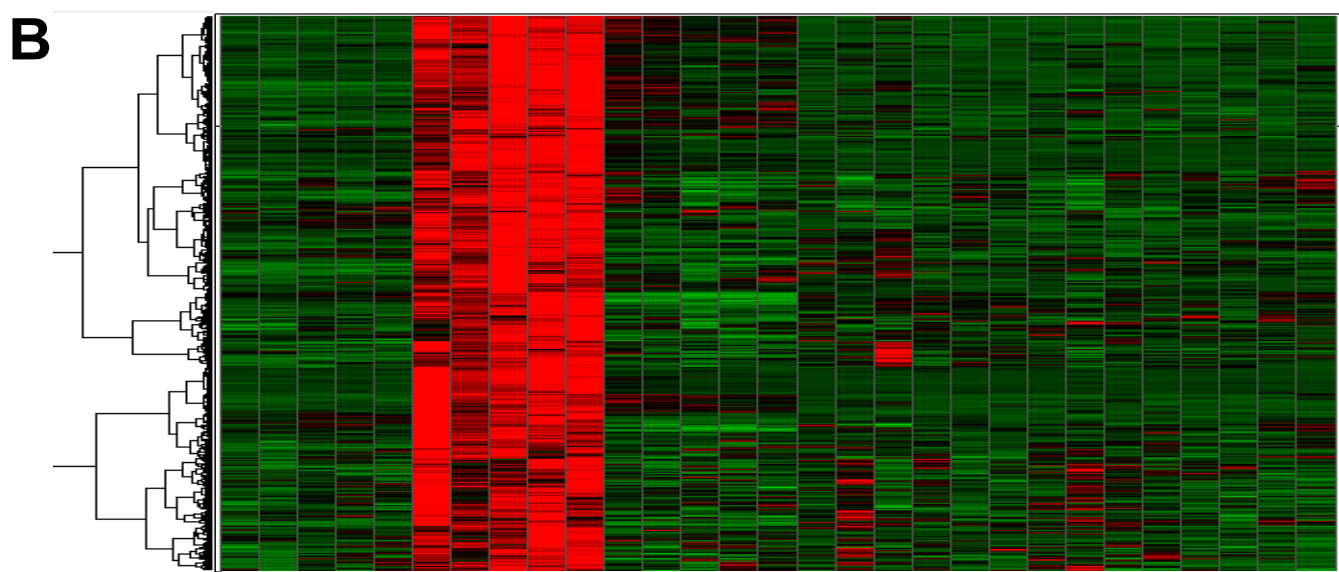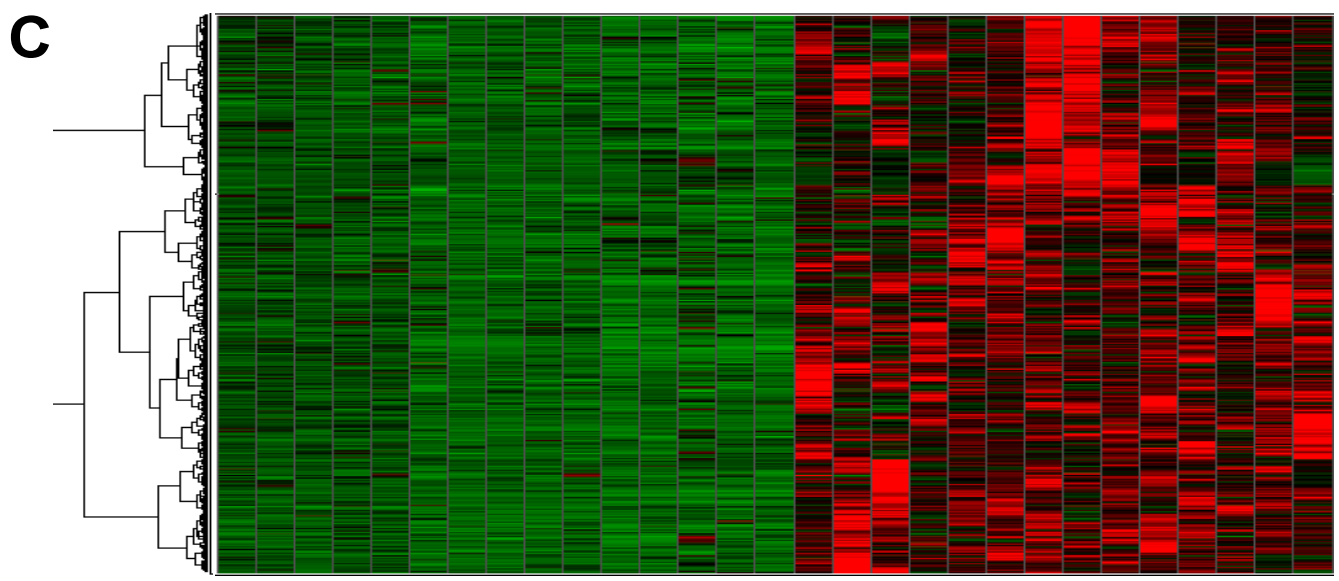

**Supplemental Figure 1.** Identification of genes with significantly different expression in M3 compared to normal myeloid cell fractions. A. Heatmap of microarray data shows genes that are normally expressed only in CD34+ cells, but are aberrantly expressed in M3 cells. B. Heatmap of microarray data shows genes that are normally expressed in promyelocytes, but not expressed in M3 AML cells. C. Heatmap of microarray data shows genes with very high expression levels in M3 cells, but little or no expression in any normal myeloid fraction.

**A**

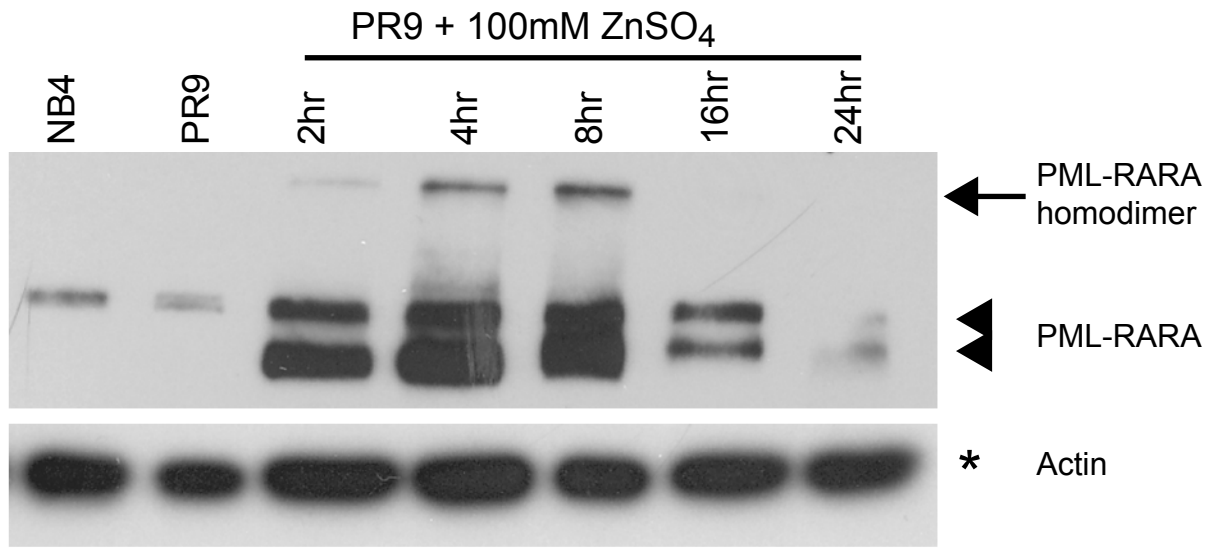

**B**

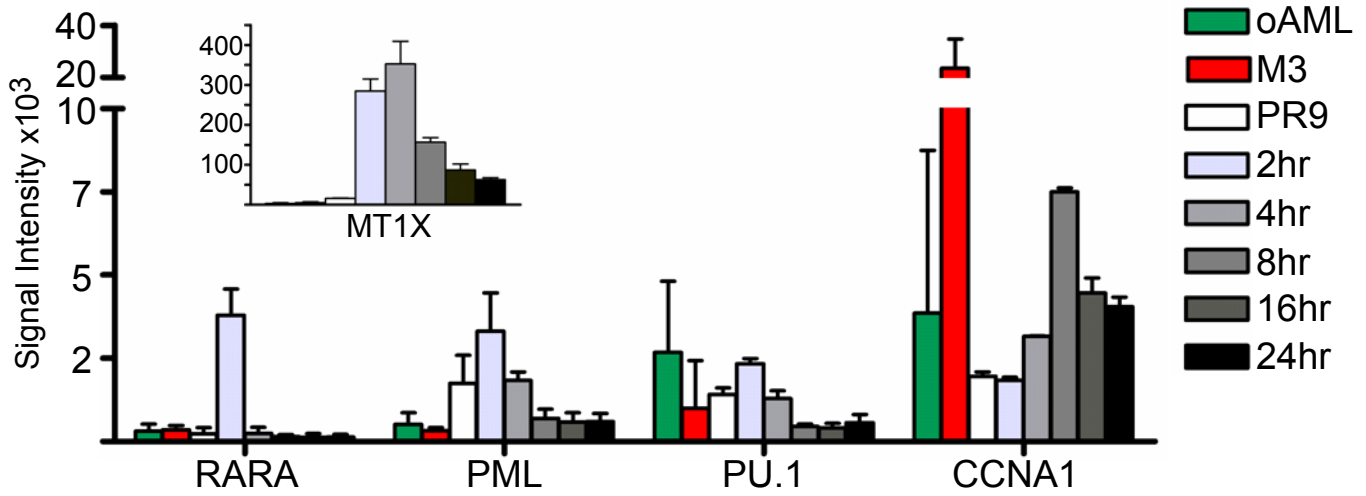

**Supplemental Figure 2.** Zn<sup>2+</sup> treatment induces PML-RARA expression and up-regulation of known downstream targets in PR-9 cells. A. Western blot showing PML-RARA and actin protein levels at 0, 2, 4, 8, 16 and 24 hours post Zn<sup>2+</sup>-induction. NB4 cells, which express PML-RARA, serve as a positive control in lane 1. B. Expression of PML, RARA, PU.1 and CCNA1 in other AML (oAML) subtypes, M3, and PR-9 cells 0-24 hours post Zn<sup>2+</sup>-induction. All are upregulated after PML-RARA induction, as expected. Inset: MTX1, a known Zn-responsive gene, is also upregulated after Zn<sup>2+</sup> treatment.

Supplemental Table 1. M3-specific dysregulome (510 genes)

| Figure 2B<br>Probeset | Gene<br>Symbol                         | Entrez<br>Gene | Gene Title                                                                                  |
|-----------------------|----------------------------------------|----------------|---------------------------------------------------------------------------------------------|
| 215409_at             | AGPAT7                                 | 254531         | 1-acylglycerol-3-phosphate O-acyltransferase 7 (lysophosphatidic acid acyltransferase, eta) |
| 228264_at             | ACCS                                   | 84680          | 1-aminocyclopropane-1-carboxylate synthase homolog (Arabidopsis)(non-functional)            |
| 200862_at             | DHCR24                                 | 1718           | 24-dehydrocholesterol reductase                                                             |
| 218043_s_at           | AZ12                                   | 64343          | 5-azacytidine induced 2                                                                     |
| 218051_s_at           | NT5DC2                                 | 64943          | 5'-nucleotidase domain containing 2                                                         |
| 201790_s_at           | DHCR7                                  | 1717           | 7-dehydrocholesterol reductase                                                              |
| 215483_at             | AKAP9                                  | 10142          | A kinase (PRKA) anchor protein (yotiao) 9                                                   |
| 225098_at             | ABI2                                   | 10152          | abl interactor 2                                                                            |
| 49452_at              | ACACB                                  | 32             | acetyl-Coenzyme A carboxylase beta                                                          |
| 200974_at             | ACTA2                                  | 59             | actin, alpha 2, smooth muscle, aorta                                                        |
| 208002_s_at           | ACOT7                                  | 11332          | acyl-CoA thioesterase 7                                                                     |
| 210278_s_at           | AP4S1                                  | 11154          | adaptor-related protein complex 4, sigma 1 subunit                                          |
| 204497_at             | ADCY9                                  | 115            | adenylate cyclase 9                                                                         |
| 225342_at             | AK3L1                                  | 205            | adenylate kinase 3-like 1                                                                   |
| 204348_s_at           | AK3L1 ///<br>AK3L2                     |                | adenylate kinase 3-like 1 /// adenylate kinase 3-like 2                                     |
| 226718_at             | AMIGO1                                 | 57463          | adhesion molecule with Ig-like domain 1                                                     |
| 228094_at             | AMICA1                                 | 120425         | adhesion molecule, interacts with CXADR antigen 1                                           |
| 209122_at             | ADFP                                   | 123            | adipose differentiation-related protein                                                     |
| 201792_at             | AEBP1                                  | 165            | AE binding protein 1                                                                        |
| 212285_s_at           | AGRN                                   | 375790         | agrin                                                                                       |
| 202053_s_at           | ALDH3A2                                | 224            | aldehyde dehydrogenase 3 family, member A2                                                  |
| 223136_at             | AIG1                                   | 51390          | androgen-induced 1                                                                          |
| 223092_at             | ANKH                                   | 56172          | ankylosis, progressive homolog (mouse)                                                      |
| 229307_at             | ANKRD28                                | 23243          | ankyrin repeat domain 28                                                                    |
| 201590_x_at           | ANXA2                                  | 302            | annexin A2                                                                                  |
| 201301_s_at           | ANXA4                                  | 307            | annexin A4                                                                                  |
|                       | ANXA8 ///<br>ANXA8L1<br>///<br>ANXA8L2 |                | annexin A8-like 2 /// annexin A8 /// annexin A8-like 1                                      |
| 219366_at             | AVEN                                   | 57099          | apoptosis, caspase activation inhibitor                                                     |
| 39248_at              | AQP3                                   | 360            | aquaporin 3 (Gill blood group)                                                              |
| 207076_s_at           | ASS1                                   | 445            | argininosuccinate synthetase 1                                                              |
| 218694_at             | ARMCX1                                 | 51309          | armadillo repeat containing, X-linked 1                                                     |
| 230244_at             | UNQ830                                 | 389084         | ASCL830                                                                                     |
| 205047_s_at           | ASNS                                   | 440            | asparagine synthetase                                                                       |
| 210192_at             | ATP8A1                                 | 10396          | ATPase, aminophospholipid transporter (APLT), class I, type 8A, member 1                    |
| 219660_s_at           | ATP8A2                                 | 51761          | ATPase, aminophospholipid transporter-like, class I, type 8A, member 2                      |
| 201242_s_at           | ATP1B1                                 | 481            | ATPase, Na <sup>+</sup> /K <sup>+</sup> transporting, beta 1 polypeptide                    |
| 203505_at             | ABCA1                                  | 19             | ATP-binding cassette, sub-family A (ABC1), member 1                                         |
| 203196_at             | ABCC4                                  | 10257          | ATP-binding cassette, sub-family C (CFTR/MRP), member 4                                     |
| 212599_at             | AUTS2                                  | 26053          | autism susceptibility candidate 2                                                           |
| 214575_s_at           | AZU1                                   | 566            | azurocidin 1 (cationic antimicrobial protein 37)                                            |
| 222746_s_at           | BSPRY                                  | 54836          | B-box and SPRY domain containing                                                            |
| 1559078_at            | BCL11A                                 | 53335          | B-cell CLL/lymphoma 11A (zinc finger protein)                                               |
| 205681_at             | BCL2A1                                 | 597            | BCL2-related protein A1                                                                     |
| 205839_s_at           | BZRAP1                                 | 9256           | benzodiazapine receptor (peripheral) associated protein 1                                   |
| 217904_s_at           | BACE1                                  | 23621          | beta-site APP-cleaving enzyme 1                                                             |
| 225285_at             | BCAT1                                  | 586            | branched chain aminotransferase 1, cytosolic                                                |

Supplemental Table 1. M3-specific dysregulome (510 genes)

| <b>Figure 2B<br/>Probeset</b> | <b>Gene<br/>Symbol</b>                                           | <b>Entrez<br/>Gene</b> | <b>Gene Title</b>                                                                                                                                                                                             |
|-------------------------------|------------------------------------------------------------------|------------------------|---------------------------------------------------------------------------------------------------------------------------------------------------------------------------------------------------------------|
| 207693_at                     | CACNB4                                                           | 785                    | calcium channel, voltage-dependent, beta 4 subunit                                                                                                                                                            |
| 221042_s_at                   | CLMN                                                             | 79789                  | calmin (calponin-like, transmembrane)                                                                                                                                                                         |
| 221879_at                     | CALML4                                                           | 91860                  | calmodulin-like 4                                                                                                                                                                                             |
| 212586_at                     | CAST                                                             | 831                    | calpastatin                                                                                                                                                                                                   |
| 200935_at                     | CALR                                                             | 811                    | calreticulin                                                                                                                                                                                                  |
| 211031_s_at                   | CLIP2                                                            | 7461                   | CAP-GLY domain containing linker protein 2                                                                                                                                                                    |
| 201850_at                     | CAPG                                                             | 822                    | capping protein (actin filament), gelsolin-like                                                                                                                                                               |
| 227522_at                     | CMBL                                                             | 134147                 | carboxymethylenebutenolidase homolog (Pseudomonas)                                                                                                                                                            |
| 205624_at                     | CPA3                                                             | 1359                   | carboxypeptidase A3 (mast cell)                                                                                                                                                                               |
| 209790_s_at                   | CASP6                                                            | 839                    | caspace 6, apoptosis-related cysteine peptidase                                                                                                                                                               |
| 225647_s_at                   | CTSC                                                             | 1075                   | cathepsin C                                                                                                                                                                                                   |
| 205653_at                     | CTSG                                                             | 1511                   | cathepsin G                                                                                                                                                                                                   |
| 214450_at                     | CTSW                                                             | 1521                   | cathepsin W                                                                                                                                                                                                   |
| 203324_s_at                   | CAV2                                                             | 858                    | caveolin 2                                                                                                                                                                                                    |
| 214523_at                     | CEBPE                                                            | 1053                   | CCAAT/enhancer binding protein (C/EBP), epsilon                                                                                                                                                               |
| 217078_s_at                   | CD300A                                                           | 11314                  | CD300a molecule                                                                                                                                                                                               |
| 218529_at                     | CD320                                                            | 51293                  | CD320 molecule                                                                                                                                                                                                |
| 206488_s_at                   | CD36                                                             | 948                    | CD36 molecule (thrombospondin receptor)                                                                                                                                                                       |
| 213539_at                     | CD3D                                                             | 915                    | CD3d molecule, delta (CD3-TCR complex)                                                                                                                                                                        |
| 204489_s_at                   | CD44                                                             | 960                    | CD44 molecule (Indian blood group)                                                                                                                                                                            |
| 200663_at                     | CD63                                                             | 967                    | CD63 molecule                                                                                                                                                                                                 |
| 201005_at                     | CD9                                                              | 928                    | CD9 molecule                                                                                                                                                                                                  |
| 206761_at                     | CD96                                                             | 10225                  | CD96 molecule                                                                                                                                                                                                 |
| 201028_s_at                   | CD99                                                             | 4267                   | CD99 molecule                                                                                                                                                                                                 |
| 221556_at                     | CDC14B ///<br>CDC14C                                             |                        | CDC14 cell division cycle 14 homolog B (S. cerevisiae) /// CDC14 cell division cycle 14 homolog C (S. cerevisiae)                                                                                             |
| 217849_s_at                   | CDC42BPB                                                         | 9578                   | CDC42 binding protein kinase beta (DMPK-like)                                                                                                                                                                 |
| 232355_at                     | ---                                                              |                        | CDNA FLJ10247 fis, clone HEMBB1000705                                                                                                                                                                         |
| 233422_at                     | ---                                                              |                        | CDNA FLJ10277 fis, clone HEMBB1001199                                                                                                                                                                         |
| 236787_at                     | ---                                                              |                        | CDNA FLJ35091 fis, clone PLACE6005786                                                                                                                                                                         |
| 243937_x_at                   | BMS1P5 ///<br>CTGLF1 ///<br>CTGLF6 ///<br>CTGLF7                 |                        | centaurin, gamma-like family, member 1 /// BMS1 pseudogene 5 /// centaurin, gamma-like family, member 6 /// centaurin, gamma-like family, member 7                                                            |
| 221850_x_at                   | CTGLF1 ///<br>CTGLF3 ///<br>CTGLF4 ///<br>CTGLF5 ///<br>KIAA1975 |                        | centaurin, gamma-like family, member 1 /// KIAA1975 protein similar to MRIP2 /// centaurin, gamma-like family, member 3 /// centaurin, gamma-like family, member 4 /// centaurin, gamma-like family, member 5 |
| 239151_at                     | CTGLF6                                                           | 642517                 | centaurin, gamma-like family, member 6                                                                                                                                                                        |
| 223513_at                     | CENPJ                                                            | 55835                  | centromere protein J                                                                                                                                                                                          |
| 242041_at                     | CSPP1                                                            | 79848                  | centrosome and spindle pole associated protein 1                                                                                                                                                              |
| 224794_s_at                   | CERCAM                                                           | 51148                  | cerebral endothelial cell adhesion molecule                                                                                                                                                                   |
| 229958_at                     | CLN8                                                             | 2055                   | ceroid-lipofuscinosis, neuronal 8 (epilepsy, progressive with mental retardation)                                                                                                                             |
| 213385_at                     | CHN2                                                             | 1124                   | chimerin (chimaerin) 2                                                                                                                                                                                        |
| 226473_at                     | CBX2                                                             | 84733                  | chromobox homolog 2 (Pc class homolog, Drosophila)                                                                                                                                                            |
| 226123_at                     | CHD7                                                             | 55636                  | chromodomain helicase DNA binding protein 7                                                                                                                                                                   |
| 205944_s_at                   | CLTCL1                                                           | 8218                   | clathrin, heavy chain-like 1                                                                                                                                                                                  |
| 208792_s_at                   | CLU                                                              | 1191                   | clusterin                                                                                                                                                                                                     |
| 205229_s_at                   | COCH                                                             | 1690                   | coagulation factor C homolog, cochlin (Limulus polyphemus)                                                                                                                                                    |

Supplemental Table 1. M3-specific dysregulome (510 genes)

| <b>Figure 2B<br/>Probeset</b> | <b>Gene<br/>Symbol</b> | <b>Entrez<br/>Gene</b> | <b>Gene Title</b>                                                                                             |
|-------------------------------|------------------------|------------------------|---------------------------------------------------------------------------------------------------------------|
| 204363_at                     | F3                     | 2152                   | coagulation factor III (thromboplastin, tissue factor)                                                        |
| 201161_s_at                   | CSDA                   | 8531                   | cold shock domain protein A                                                                                   |
| 229168_at                     | COL23A1                | 91522                  | collagen, type XXIII, alpha 1                                                                                 |
| 205382_s_at                   | CFD                    | 1675                   | complement factor D (adipsin)                                                                                 |
| 215388_s_at                   | CFH ///<br>CFHR1       |                        | complement factor H /// complement factor H-related 1                                                         |
| 225129_at                     | CPNE2                  | 221184                 | copine II                                                                                                     |
| 202118_s_at                   | CPNE3                  | 8895                   | copine III                                                                                                    |
| 205538_at                     | CORO2A                 | 7464                   | coronin, actin binding protein, 2A                                                                            |
| 211709_s_at                   | CLEC11A                | 6320                   | C-type lectin domain family 11, member A                                                                      |
| 232466_at                     | CUL4A                  | 8451                   | Cullin 4A                                                                                                     |
| 1560018_at                    | ARPP-21                | 10777                  | cyclic AMP-regulated phosphoprotein, 21 kD                                                                    |
| 205899_at                     | CCNA1                  | 8900                   | cyclin A1                                                                                                     |
| 200953_s_at                   | CCND2                  | 894                    | cyclin D2                                                                                                     |
| 224851_at                     | CDK6                   | 1021                   | cyclin-dependent kinase 6                                                                                     |
| 213348_at                     | CDKN1C                 | 1028                   | cyclin-dependent kinase inhibitor 1C (p57, Kip2)                                                              |
| 209644_x_at                   | CDKN2A                 | 1029                   | cyclin-dependent kinase inhibitor 2A (melanoma, p16, inhibits CDK4)                                           |
| 205518_s_at                   | CMAH                   | 8418                   | cytidine monophosphate-N-acetylneuraminic acid hydroxylase (CMP-N-acetylneuraminate monooxygenase) pseudogene |
| 217889_s_at                   | CYBRD1                 | 79901                  | cytochrome b reductase 1                                                                                      |
| 209975_at                     | CYP2E1                 | 1571                   | cytochrome P450, family 2, subfamily E, polypeptide 1                                                         |
| 223377_x_at                   | CISH                   | 1154                   | cytokine inducible SH2-containing protein                                                                     |
| 219837_s_at                   | CYTL1                  | 54360                  | cytokine-like 1                                                                                               |
| 222101_s_at                   | DCHS1                  | 8642                   | dachsous 1 (Drosophila)                                                                                       |
| 239648_at                     | DCUN1D3                | 123879                 | DCN1, defective in cullin neddylation 1, domain containing 3 (S. cerevisiae)                                  |
| 224215_s_at                   | DLL1                   | 28514                  | delta-like 1 (Drosophila)                                                                                     |
| 228293_at                     | DEPDC7                 | 91614                  | DEP domain containing 7                                                                                       |
| 218854_at                     | DSE                    | 29940                  | dermatan sulfate epimerase                                                                                    |
| 226817_at                     | DSC2                   | 1824                   | desmocollin 2                                                                                                 |
| 201681_s_at                   | DLG5                   | 9231                   | discs, large homolog 5 (Drosophila)                                                                           |
| 215761_at                     | DMXL2                  | 23312                  | Dmx-like 2                                                                                                    |
| 215433_at                     | DPY19L1                | 23333                  | Dpy-19-like 1 (C. elegans)                                                                                    |
| 215102_at                     | DPY19L1P<br>1          | 89231                  | dpy-19-like 1 pseudogene 1 (C. elegans)                                                                       |
| 238784_at                     | DPY19L2                | 283417                 | dpy-19-like 2 (C. elegans)                                                                                    |
| 215116_s_at                   | DNM1                   | 1759                   | dynamamin 1                                                                                                   |
| 212838_at                     | DNMBP                  | 23268                  | dynamamin binding protein                                                                                     |
| 233850_s_at                   | EBF4                   | 57593                  | early B-cell factor 4                                                                                         |
| 227404_s_at                   | EGR1                   | 1958                   | Early growth response 1                                                                                       |
| 204160_s_at                   | ENPP4                  | 22875                  | ectonucleotide pyrophosphatase/phosphodiesterase 4 (putative function)                                        |
| 211200_s_at                   | EFCAB2                 | 84288                  | EF-hand calcium binding domain 2                                                                              |
| 206580_s_at                   | EFEMP2                 | 30008                  | EGF-containing fibulin-like extracellular matrix protein 2                                                    |
| 206871_at                     | ELA2                   | 1991                   | elastase 2, neutrophil                                                                                        |
| 204163_at                     | EMILIN1                | 11117                  | elastin microfibril interfacier 1                                                                             |
| 213779_at                     | EMID1                  | 129080                 | EMI domain containing 1                                                                                       |
| 204503_at                     | EVPL                   | 2125                   | envoplakin                                                                                                    |
| 223253_at                     | EPDR1                  | 54749                  | ependymin related protein 1 (zebrafish)                                                                       |
| 231944_at                     | ERO1LB                 | 56605                  | ERO1-like beta (S. cerevisiae)                                                                                |
| 226432_at                     | ETNK1                  | 55500                  | ethanolamine kinase 1                                                                                         |
| 236700_at                     | EIF3C                  | 8663                   | eukaryotic translation initiation factor 3, subunit C                                                         |
| 209365_s_at                   | ECM1                   | 1893                   | extracellular matrix protein 1                                                                                |

Supplemental Table 1. M3-specific dysregulome (510 genes)

| Figure 2B<br>Probeset | Gene<br>Symbol            | Entrez<br>Gene | Gene Title                                                                              |
|-----------------------|---------------------------|----------------|-----------------------------------------------------------------------------------------|
| 231846_at             | FOXRED2                   | 80020          | FAD-dependent oxidoreductase domain containing 2                                        |
| 229459_at             | FAM19A5                   | 25817          | family with sequence similarity 19 (chemokine (C-C motif)-like), member A5              |
| 1568865_at            | FNTB                      | 2342           | Farnesyltransferase, CAAX box, beta                                                     |
| 210933_s_at           | FSCN1                     | 6624           | fascin homolog 1, actin-bundling protein (Strongylocentrotus purpuratus)                |
| 216080_s_at           | FADS3                     | 3995           | fatty acid desaturase 3                                                                 |
| 227222_at             | FBXO10                    | 26267          | F-box protein 10                                                                        |
| 224162_s_at           | FBXO31                    | 79791          | F-box protein 31                                                                        |
| 1560031_at            | FRMD4A                    | 55691          | FERM domain containing 4A                                                               |
| 205110_s_at           | FGF13                     | 2258           | fibroblast growth factor 13                                                             |
| 211535_s_at           | FGFR1                     | 2260           | fibroblast growth factor receptor 1 (fms-related tyrosine kinase 2, Pfeiffer syndrome)  |
| 204379_s_at           | FGFR3                     | 2261           | fibroblast growth factor receptor 3 (achondroplasia, thanatophoric dwarfism)            |
| 223321_s_at           | FGFRL1                    | 53834          | fibroblast growth factor receptor-like 1                                                |
| 218618_s_at           | FNDC3B                    | 64778          | fibronectin type III domain containing 3B                                               |
| 202994_s_at           | FBLN1                     | 2192           | fibulin 1                                                                               |
| 219118_at             | FKBP11                    | 51303          | FK506 binding protein 11, 19 kDa                                                        |
| 210220_at             | FZD2                      | 2535           | frizzled homolog 2 (Drosophila)                                                         |
| 202862_at             | FAH                       | 2184           | fumarylacetoacetate hydrolase (fumarylacetoacetase)                                     |
| 229312_s_at           | GKAP1                     | 80318          | G kinase anchoring protein 1                                                            |
| 228770_at             | GPR146                    | 115330         | G protein-coupled receptor 146                                                          |
| 221902_at             | GPR153                    | 387509         | G protein-coupled receptor 153                                                          |
| 232912_at             | GPR180                    | 160897         | G protein-coupled receptor 180                                                          |
| 204537_s_at           | GABRE                     | 2564           | gamma-aminobutyric acid (GABA) A receptor, epsilon                                      |
| 208438_s_at           | FGR                       | 2268           | Gardner-Rasheed feline sarcoma viral (v-fgr) oncogene homolog                           |
| 215659_at             | GSDML                     | 55876          | Gasdermin-like                                                                          |
| 210358_x_at           | GATA2                     | 2624           | GATA binding protein 2                                                                  |
| 220773_s_at           | GPHN                      | 10243          | gephyrin                                                                                |
| 224839_s_at           | GPT2                      | 84706          | glutamic pyruvate transaminase (alanine aminotransferase) 2                             |
| 205164_at             | GCAT                      | 23464          | glycine C-acetyltransferase (2-amino-3-ketobutyrate coenzyme A ligase)                  |
| 208798_x_at           | GOLGA8A                   | 23015          | golgi autoantigen, golgin subfamily a, 8A                                               |
| 210425_x_at           | GOLGA8A<br>///<br>GOLGA8B |                | golgi autoantigen, golgin subfamily a, 8A /// golgi autoantigen, golgin subfamily a, 8B |
| 238002_at             | GOLIM4                    | 27333          | golgi integral membrane protein 4                                                       |
| 217771_at             | GOLM1                     | 51280          | golgi membrane protein 1                                                                |
| 31874_at              | GAS2L1                    | 10634          | growth arrest-specific 2 like 1                                                         |
| 216860_s_at           | GDF11                     | 10220          | growth differentiation factor 11                                                        |
| 209409_at             | GRB10                     | 2887           | growth factor receptor-bound protein 10                                                 |
| 229377_at             | GRTP1                     | 79774          | growth hormone regulated TBC protein 1                                                  |
| 219777_at             | GIMAP6                    | 474344         | GTPase, IMAP family member 6                                                            |
| 40562_at              | GNA11                     | 2767           | guanine nucleotide binding protein (G protein), alpha 11 (Gq class)                     |
| 207124_s_at           | GNB5                      | 10681          | guanine nucleotide binding protein (G protein), beta 5                                  |
| 226840_at             | H2AFY                     | 9555           | H2A histone family, member Y                                                            |
| 211936_at             | HSPA5                     | 3309           | heat shock 70kDa protein 5 (glucose-regulated protein, 78kDa)                           |
| 1570200_at            | HELB                      | 92797          | helicase (DNA) B                                                                        |
| 209458_x_at           | HBA1 ///<br>HBA2          |                | hemoglobin, alpha 1 /// hemoglobin, alpha 2                                             |
| 227361_at             | HS3ST3B1                  | 9953           | heparan sulfate (glucosamine) 3-O-sulfotransferase 3B1                                  |
| 201655_s_at           | HSPG2                     | 3339           | heparan sulfate proteoglycan 2                                                          |

Supplemental Table 1. M3-specific dysregulome (510 genes)

| Figure 2B<br>Probeset | Gene<br>Symbol | Entrez<br>Gene | Gene Title                                                         |
|-----------------------|----------------|----------------|--------------------------------------------------------------------|
| 203821_at             | HBEGF          | 1839           | heparin-binding EGF-like growth factor                             |
| 210755_at             | HGF            | 3082           | hepatocyte growth factor (hepapoietin A; scatter factor)           |
| 210997_at             | HGF            | 3082           | hepatocyte growth factor (hepapoietin A; scatter factor)           |
| 1555653_at            | HNRNPA3        | 220988         | heterogeneous nuclear ribonucleoprotein A3                         |
| 235500_at             | HNRNPC         | 3183           | heterogeneous nuclear ribonucleoprotein C (C1/C2)                  |
|                       | HRNBP3 ///     |                | hexaribonucleotide binding protein 3 ///                           |
|                       | LOC10013       |                | hypothetical protein LOC100130312 ///                              |
| 235468_at             | 0312 ///       |                | hypothetical protein LOC100133332                                  |
|                       | LOC10013       |                |                                                                    |
|                       | 3332           |                |                                                                    |
| 205936_s_at           | HK3            | 3101           | hexokinase 3 (white cell)                                          |
| 225601_at             | HMGB3          | 3149           | high-mobility group box 3                                          |
| 222126_at             | HRBL           | 3268           | HIV-1 Rev binding protein-like                                     |
| 226651_at             | HOMER1         | 9456           | homer homolog 1 (Drosophila)                                       |
| 231050_at             | HRASLS5        | 117245         | HRAS-like suppressor family, member 5                              |
| 211728_s_at           | HYAL3 ///      |                | hyaluronoglucosaminidase 3 ///                                     |
|                       | NAT6           |                | N-acetyltransferase 6                                              |
| 200825_s_at           | HYOU1          | 10525          | hypoxia up-regulated 1                                             |
| 1554452_a_at          | HIG2           | 29923          | hypoxia-inducible protein 2                                        |
|                       | ING5 ///       |                | inhibitor of growth family, member 5 ///                           |
| 229197_at             | LOC72777       |                |                                                                    |
|                       | 3              |                |                                                                    |
| 202662_s_at           | ITPR2          | 3709           | inositol 1,4,5-triphosphate receptor, type 2                       |
| 226216_at             | INSR           | 3643           | insulin receptor                                                   |
| 202718_at             | IGFBP2         | 3485           | insulin-like growth factor binding protein 2, 36kDa                |
| 211959_at             | IGFBP5         | 3488           | insulin-like growth factor binding protein 5                       |
| 201163_s_at           | IGFBP7         | 3490           | insulin-like growth factor binding protein 7                       |
| 202747_s_at           | ITM2A          | 9452           | integral membrane protein 2A                                       |
| 1555349_a_at          | ITGB2          | 3689           | integrin, beta 2 (complement component 3 receptor 3 and 4 subunit) |
| 226535_at             | ITGB6          | 3694           | integrin, beta 6                                                   |
| 224514_x_at           | IL17RC         | 84818          | interleukin 17 receptor C                                          |
| 212195_at             | IL6ST          | 3572           | interleukin 6 signal transducer (gp130, oncostatin M receptor)     |
| 213392_at             | IQCK           | 124152         | IQ motif containing K                                              |
| 230472_at             | IRX1           | 79192          | iroquois homeobox 1                                                |
| 229638_at             | IRX3           | 79191          | iroquois homeobox 3                                                |
| 210239_at             | IRX5           | 10265          | iroquois homeobox 5                                                |
| 202069_s_at           | IDH3A          | 3419           | isocitrate dehydrogenase 3 (NAD+) alpha                            |
| 216268_s_at           | JAG1           | 182            | jagged 1 (Alagille syndrome)                                       |
| 211202_s_at           | JARID1B        | 10765          | jumonji, AT rich interactive domain 1B                             |
| 201466_s_at           | JUN            | 3725           | jun oncogene                                                       |
|                       | JAM3 ///       |                | junctional adhesion molecule 3 ///                                 |
| 212813_at             | LOC10013       |                | hypothetical protein LOC100133502                                  |
|                       | 3502           |                |                                                                    |
| 220010_at             | KCNE1L         | 23630          | KCNE1-like                                                         |
| 243428_at             | KCNQ1OT        | 10984          | KCNQ1 overlapping transcript 1 (non-protein coding)                |
|                       | 1              |                |                                                                    |
| 212236_x_at           | KRT17          | 3872           | keratin 17                                                         |
| 201596_x_at           | KRT18          | 3875           | keratin 18                                                         |
| 234307_s_at           | KIF26A         | 26153          | kinesin family member 26A                                          |
| 216264_s_at           | LAMB2          | 3913           | laminin, beta 2 (laminin S)                                        |
| 200771_at             | LAMC1          | 3915           | laminin, gamma 1 (formerly LAMB2)                                  |
| 244881_at             | LMLN           | 89782          | leishmanolysin-like (metallopeptidase M8 family)                   |

Supplemental Table 1. M3-specific dysregulome (510 genes)

| Figure 2B Probeset | Gene Symbol                                                                                                                                      | Entrez Gene | Gene Title                                                                                                                                                                                                                                                                                                                                                                                                                                                                                                                                                                                                                                                                                                                                                                                                             |
|--------------------|--------------------------------------------------------------------------------------------------------------------------------------------------|-------------|------------------------------------------------------------------------------------------------------------------------------------------------------------------------------------------------------------------------------------------------------------------------------------------------------------------------------------------------------------------------------------------------------------------------------------------------------------------------------------------------------------------------------------------------------------------------------------------------------------------------------------------------------------------------------------------------------------------------------------------------------------------------------------------------------------------------|
| 205381_at          | LRRC17                                                                                                                                           | 10234       | leucine rich repeat containing 17                                                                                                                                                                                                                                                                                                                                                                                                                                                                                                                                                                                                                                                                                                                                                                                      |
| 206076_at          | LRRC23                                                                                                                                           | 10233       | leucine rich repeat containing 23                                                                                                                                                                                                                                                                                                                                                                                                                                                                                                                                                                                                                                                                                                                                                                                      |
| 1559502_s_at       | LRRC25                                                                                                                                           | 126364      | leucine rich repeat containing 25                                                                                                                                                                                                                                                                                                                                                                                                                                                                                                                                                                                                                                                                                                                                                                                      |
| 227423_at          | LRRC28                                                                                                                                           | 123355      | leucine rich repeat containing 28                                                                                                                                                                                                                                                                                                                                                                                                                                                                                                                                                                                                                                                                                                                                                                                      |
| 235359_at          | LRRC33                                                                                                                                           | 375387      | leucine rich repeat containing 33                                                                                                                                                                                                                                                                                                                                                                                                                                                                                                                                                                                                                                                                                                                                                                                      |
| 215063_x_at        | LRRC40                                                                                                                                           | 55631       | leucine rich repeat containing 40                                                                                                                                                                                                                                                                                                                                                                                                                                                                                                                                                                                                                                                                                                                                                                                      |
| 210784_x_at        | LILRA6 ///<br>LILRB3                                                                                                                             |             | leukocyte immunoglobulin-like receptor, subfamily B (with TM and ITIM domains), member 3 /// leukocyte immunoglobulin-like receptor, subfamily A (with TM domain), member 6                                                                                                                                                                                                                                                                                                                                                                                                                                                                                                                                                                                                                                            |
| 207106_s_at        | LTK                                                                                                                                              | 4058        | leukocyte receptor tyrosine kinase                                                                                                                                                                                                                                                                                                                                                                                                                                                                                                                                                                                                                                                                                                                                                                                     |
| 208771_s_at        | LTA4H                                                                                                                                            | 4048        | leukotriene A4 hydrolase                                                                                                                                                                                                                                                                                                                                                                                                                                                                                                                                                                                                                                                                                                                                                                                               |
| 206480_at          | LTC4S                                                                                                                                            | 4056        | leukotriene C4 synthase                                                                                                                                                                                                                                                                                                                                                                                                                                                                                                                                                                                                                                                                                                                                                                                                |
| 218656_s_at        | LHFP                                                                                                                                             | 10186       | lipoma HMGIC fusion partner                                                                                                                                                                                                                                                                                                                                                                                                                                                                                                                                                                                                                                                                                                                                                                                            |
| 212658_at          | LHFPL2                                                                                                                                           | 10184       | lipoma HMGIC fusion partner-like 2                                                                                                                                                                                                                                                                                                                                                                                                                                                                                                                                                                                                                                                                                                                                                                                     |
| 204381_at          | LRP3                                                                                                                                             | 4037        | low density lipoprotein receptor-related protein 3                                                                                                                                                                                                                                                                                                                                                                                                                                                                                                                                                                                                                                                                                                                                                                     |
| 209468_at          | LRP5                                                                                                                                             | 4041        | low density lipoprotein receptor-related protein 5                                                                                                                                                                                                                                                                                                                                                                                                                                                                                                                                                                                                                                                                                                                                                                     |
| 207734_at          | LAX1                                                                                                                                             | 54900       | lymphocyte transmembrane adaptor 1                                                                                                                                                                                                                                                                                                                                                                                                                                                                                                                                                                                                                                                                                                                                                                                     |
| 206960_at          | LPAR4                                                                                                                                            | 2846        | lysophosphatidic acid receptor 4                                                                                                                                                                                                                                                                                                                                                                                                                                                                                                                                                                                                                                                                                                                                                                                       |
| 227145_at          | LOXL4                                                                                                                                            | 84171       | lysyl oxidase-like 4                                                                                                                                                                                                                                                                                                                                                                                                                                                                                                                                                                                                                                                                                                                                                                                                   |
| 205614_x_at        | MST1                                                                                                                                             | 4485        | macrophage stimulating 1 (hepatocyte growth factor-like)                                                                                                                                                                                                                                                                                                                                                                                                                                                                                                                                                                                                                                                                                                                                                               |
| 213380_x_at        | MSTP9                                                                                                                                            | 11223       | macrophage stimulating, pseudogene 9                                                                                                                                                                                                                                                                                                                                                                                                                                                                                                                                                                                                                                                                                                                                                                                   |
| 211654_x_at        | HLA-DQB1                                                                                                                                         | 3119        | major histocompatibility complex, class II, DQ beta 1                                                                                                                                                                                                                                                                                                                                                                                                                                                                                                                                                                                                                                                                                                                                                                  |
|                    |                                                                                                                                                  |             | major histocompatibility complex, class II, DQ beta 1 /// major histocompatibility complex, class II, DQ beta 2 /// major histocompatibility complex, class II, DR beta 1 /// major histocompatibility complex, class II, DR beta 2 (pseudogene) /// major histocompatibility complex, class II, DR beta 3 /// major histocompatibility complex, class II, DR beta 4 /// major histocompatibility complex, class II, DR beta 5 /// ribonuclease, RNase A family, 2 (liver, eosinophil-derived neurotoxin) /// zinc finger protein 749 /// hypothetical protein LOC730415 /// similar to Major histocompatibility complex, class II, DR beta 4 /// similar to major histocompatibility complex, class II, DQ beta 1 /// similar to HLA class II histocompatibility antigen, DR-W53 beta chain /// similar to hCG1992647 |
| 206111_at          | hCG_1998<br>957 /// HLA-<br>DQB1 ///<br>HLA-DQB2<br>/// HLA-<br>DRB1 ///<br>HLA-DRB2<br>/// HLA-<br>DRB3 ///<br>HLA-DRB4<br>/// HLA-<br>DRB5 /// |             |                                                                                                                                                                                                                                                                                                                                                                                                                                                                                                                                                                                                                                                                                                                                                                                                                        |
|                    | LOC10013<br>3484 ///                                                                                                                             |             |                                                                                                                                                                                                                                                                                                                                                                                                                                                                                                                                                                                                                                                                                                                                                                                                                        |
|                    | LOC10013<br>3583 ///                                                                                                                             |             |                                                                                                                                                                                                                                                                                                                                                                                                                                                                                                                                                                                                                                                                                                                                                                                                                        |
|                    | LOC10013<br>3661 ///                                                                                                                             |             |                                                                                                                                                                                                                                                                                                                                                                                                                                                                                                                                                                                                                                                                                                                                                                                                                        |
|                    | LOC10013<br>3811 ///                                                                                                                             |             |                                                                                                                                                                                                                                                                                                                                                                                                                                                                                                                                                                                                                                                                                                                                                                                                                        |
|                    | LOC73041<br>5 ///                                                                                                                                |             |                                                                                                                                                                                                                                                                                                                                                                                                                                                                                                                                                                                                                                                                                                                                                                                                                        |
|                    | RNASE2 ///                                                                                                                                       |             |                                                                                                                                                                                                                                                                                                                                                                                                                                                                                                                                                                                                                                                                                                                                                                                                                        |
|                    | ZNF749                                                                                                                                           |             |                                                                                                                                                                                                                                                                                                                                                                                                                                                                                                                                                                                                                                                                                                                                                                                                                        |
| 239108_at          | MLSTD1                                                                                                                                           | 55711       | Male sterility domain containing 1                                                                                                                                                                                                                                                                                                                                                                                                                                                                                                                                                                                                                                                                                                                                                                                     |
| 204059_s_at        | ME1                                                                                                                                              | 4199        | malic enzyme 1, NADP(+)-dependent, cytosolic                                                                                                                                                                                                                                                                                                                                                                                                                                                                                                                                                                                                                                                                                                                                                                           |
| 37408_at           | MRC2                                                                                                                                             | 9902        | mannose receptor, C type 2                                                                                                                                                                                                                                                                                                                                                                                                                                                                                                                                                                                                                                                                                                                                                                                             |



Supplemental Table 1. M3-specific dysregulome (510 genes)

| Figure 2B Probeset | Gene Symbol | Entrez Gene | Gene Title                                                                                           |
|--------------------|-------------|-------------|------------------------------------------------------------------------------------------------------|
| 221713_s_at        | MAP6D1      | 79929       | MAP6 domain containing 1                                                                             |
| 226210_s_at        | MEG3        | 55384       | maternally expressed 3                                                                               |
| 204575_s_at        | MMP19       | 4327        | matrix metalloproteinase 19                                                                          |
| 201069_at          | MMP2        | 4313        | matrix metalloproteinase 2 (gelatinase A, 72kDa gelatinase, 72kDa type IV collagenase)               |
| 212509_s_at        | MXRA7       | 439921      | matrix-remodelling associated 7                                                                      |
| 235409_at          | MGA         | 23269       | MAX gene associated                                                                                  |
| 35147_at           | MCF2L       | 23263       | MCF.2 cell line derived transforming sequence-like                                                   |
| 230461_s_at        | MUM1        | 84939       | Melanoma associated antigen (mutated) 1                                                              |
| 210254_at          | MS4A3       | 932         | membrane-spanning 4-domains, subfamily A, member 3 (hematopoietic cell-specific)                     |
| 224356_x_at        | MS4A6A      | 64231       | membrane-spanning 4-domains, subfamily A, member 6A                                                  |
| 211456_x_at        | MT1P2       | 645745      | metallothionein 1 pseudogene 2                                                                       |
| 213629_x_at        | MT1F        | 4494        | metallothionein 1F                                                                                   |
| 206461_x_at        | MT1H        | 4496        | metallothionein 1H                                                                                   |
| 208581_x_at        | MT1X        | 4501        | metallothionein 1X                                                                                   |
| 212185_x_at        | MT2A        | 4502        | metallothionein 2A                                                                                   |
| 223311_s_at        | MTA3        | 57504       | metastasis associated 1 family, member 3                                                             |
| 1554127_s_at       | MSRB3       | 253827      | methionine sulfoxide reductase B3                                                                    |
| 201761_at          | MTHFD2      | 10797       | methylenetetrahydrofolate dehydrogenase (NADP+ dependent) 2, methenyltetrahydrofolate cyclohydrolase |
| 224918_x_at        | MGST1       | 4257        | microsomal glutathione S-transferase 1                                                               |
| 203151_at          | MAP1A       | 4130        | microtubule-associated protein 1A                                                                    |
| 200836_s_at        | MAP4        | 4134        | microtubule-associated protein 4                                                                     |
| 203208_s_at        | MTFR1       | 9650        | mitochondrial fission regulator 1                                                                    |
| 35617_at           | MAPK7       | 5598        | mitogen-activated protein kinase 7                                                                   |
| 214786_at          | MAP3K1      | 4214        | mitogen-activated protein kinase kinase kinase 1                                                     |
| 205447_s_at        | MAP3K12     | 7786        | mitogen-activated protein kinase kinase kinase 12                                                    |
| 225997_at          | MOBK1A      | 92597       | MOB1, Mps One Binder kinase activator-like 1A (yeast)                                                |
| 226844_at          | MOBK2B      | 79817       | MOB1, Mps One Binder kinase activator-like 2B (yeast)                                                |
| 221636_s_at        | MOSC2       | 54996       | MOCO sulphurase C-terminal domain containing 2                                                       |
| 243857_at          | MORF4L2     | 9643        | Mortality factor 4 like 2                                                                            |
| 234224_at          | ---         |             | MRNA; cDNA DKFZp434O0919 (from clone DKFZp434O0919)                                                  |
| 226869_at          | MEGF6       | 1953        | multiple EGF-like-domains 6                                                                          |
| 225185_at          | MRAS        | 22808       | muscle RAS oncogene homolog                                                                          |
| 1565436_s_at       | MLL         | 4297        | myeloid/lymphoid or mixed-lineage leukemia (trithorax homolog, Drosophila)                           |
| 239289_x_at        | MTMR15      | 22909       | myotubularin related protein 15                                                                      |
| 228424_at          | NAALADL1    | 10004       | N-acetylated alpha-linked acidic dipeptidase-like 1                                                  |
| 215850_s_at        | NDUFA5      | 4698        | NADH dehydrogenase (ubiquinone) 1 alpha subcomplex, 5, 13kDa                                         |
| 228523_at          | NANOS1      | 340719      | nanos homolog 1 (Drosophila)                                                                         |
| 220429_at          | NDST3       | 9348        | N-deacetylase/N-sulfotransferase (heparan glucosaminyl) 3                                            |
| 224802_at          | NDFIP2      | 54602       | Nedd4 family interacting protein 2                                                                   |
| 227870_at          | NOPE        | 57722       | neighbor of Punc E11                                                                                 |
| 223638_at          | NBPF3       | 84224       | neuroblastoma breakpoint family, member 3                                                            |
| 218888_s_at        | NETO2       | 81831       | neuropilin (NRP) and tolloid (TLL)-like 2                                                            |
| 209949_at          | NCF2        | 4688        | neutrophil cytosolic factor 2 (65kDa, chronic granulomatous disease, autosomal 2)                    |
| 212803_at          | NAB2        | 4665        | NGFI-A binding protein 2 (EGR1 binding protein 2)                                                    |
| 202237_at          | NNMT        | 4837        | nicotinamide N-methyltransferase                                                                     |
| 1552553_a_at       | NLRC4       | 58484       | NLR family, CARD domain containing 4                                                                 |
| 231798_at          | NOG         | 9241        | noggin                                                                                               |

Supplemental Table 1. M3-specific dysregulome (510 genes)

| Figure 2B Probeset | Gene Symbol                    | Entrez Gene | Gene Title                                                                                  |
|--------------------|--------------------------------|-------------|---------------------------------------------------------------------------------------------|
| 227556_at          | NME7                           | 29922       | non-metastatic cells 7, protein expressed in (nucleoside-diphosphate kinase)                |
| 202599_s_at        | NRIP1                          | 8204        | nuclear receptor interacting protein 1                                                      |
| 219557_s_at        | NRIP3                          | 56675       | nuclear receptor interacting protein 3                                                      |
| 203920_at          | NR1H3                          | 10062       | nuclear receptor subfamily 1, group H, member 3                                             |
| 207202_s_at        | NR1I2                          | 8856        | nuclear receptor subfamily 1, group I, member 2                                             |
| 1559139_at         | NOC2L                          | 26155       | nucleolar complex associated 2 homolog (S. cerevisiae)                                      |
| 212775_at          | OBSL1                          | 23363       | obscurin-like 1                                                                             |
| 213125_at          | OLFML2B                        | 25903       | olfactomedin-like 2B                                                                        |
| 213825_at          | OLIG2                          | 10215       | oligodendrocyte lineage transcription factor 2                                              |
| 228170_at          | OLIG1                          | 116448      | oligodendrocyte transcription factor 1                                                      |
| 201364_s_at        | OAZ2                           | 4947        | ornithine decarboxylase antizyme 2                                                          |
| 225105_at          | OCC-1                          | 387882      | overexpressed in colon carcinoma-1                                                          |
| 223464_at          | OSBPL5                         | 114879      | oxysterol binding protein-like 5                                                            |
| 226435_at          | PAPLN                          | 89932       | papilin, proteoglycan-like sulfated glycoprotein                                            |
| 227204_at          | PARD6G                         | 84552       | par-6 partitioning defective 6 homolog gamma (C. elegans)                                   |
| 209815_at          | PTCH1                          | 5727        | patched homolog 1 (Drosophila)                                                              |
| 210139_s_at        | PMP22                          | 5376        | peripheral myelin protein 22                                                                |
| 212012_at          | PXDN                           | 7837        | peroxidasin homolog (Drosophila)                                                            |
| 208510_s_at        | PPARG                          | 5468        | peroxisome proliferator-activated receptor gamma                                            |
| 204604_at          | PFTK1                          | 5218        | PFTAIRE protein kinase 1                                                                    |
| 232279_at          | PHF15                          | 23338       | PHD finger protein 15                                                                       |
| 226150_at          | PPAPDC1<br>B                   | 84513       | phosphatidic acid phosphatase type 2 domain containing 1B                                   |
| 207621_s_at        | PEMT                           | 10400       | phosphatidylethanolamine N-methyltransferase                                                |
| 230352_at          | PRPS2                          | 5634        | Phosphoribosyl pyrophosphate synthetase 2                                                   |
| 201481_s_at        | PYGB                           | 5834        | phosphorylase, glycogen; brain                                                              |
| 222688_at          | PHCA                           | 55331       | phytoceramidase, alkaline                                                                   |
| 235411_at          | PGBD1                          | 84547       | piggyBac transposable element derived 1                                                     |
| 219225_at          | LOC10013<br>4440 ///<br>PGBD5  |             | piggyBac transposable element derived 5 /// similar to PGBD5 protein                        |
| 220798_x_at        | PRG2                           | 79948       | plasticity-related gene 2                                                                   |
| 205463_s_at        | PDGFA                          | 5154        | platelet-derived growth factor alpha polypeptide                                            |
| 220952_s_at        | PLEKHA5                        | 54477       | pleckstrin homology domain containing, family A member 5                                    |
| 228171_s_at        | PLEKHG4                        | 25894       | pleckstrin homology domain containing, family G (with RhoGef domain) member 4               |
| 203623_at          | PLXNA3                         | 55558       | plexin A3                                                                                   |
| 241742_at          | PRAM1                          | 84106       | PML-RARA regulated adaptor molecule 1                                                       |
| 212662_at          | PVR                            | 5817        | poliovirus receptor                                                                         |
| 224701_at          | PARP14                         | 54625       | poly (ADP-ribose) polymerase family, member 14                                              |
| 203688_at          | PKD2                           | 5311        | polycystic kidney disease 2 (autosomal dominant)                                            |
| 226246_at          | KCTD1                          | 284252      | potassium channel tetramerisation domain containing 1                                       |
| 212192_at          | KCTD12                         | 115207      | potassium channel tetramerisation domain containing 12                                      |
| 222668_at          | KCTD15                         | 79047       | potassium channel tetramerisation domain containing 15                                      |
| 239763_at          | LOC10012<br>9965 ///<br>PRDM11 |             | PR domain containing 11 /// hypothetical protein LOC100129965                               |
| 214177_s_at        | PBXIP1                         | 57326       | pre-B-cell leukemia homeobox interacting protein 1                                          |
| 226065_at          | PRICKLE1                       | 144165      | prickle homolog 1 (Drosophila)                                                              |
| 200654_at          | P4HB                           | 5034        | procollagen-proline, 2-oxoglutarate 4-dioxygenase (proline 4-hydroxylase), beta polypeptide |

Supplemental Table 1. M3-specific dysregulome (510 genes)

| Figure 2B<br>Probeset | Gene<br>Symbol       | Entrez<br>Gene | Gene Title                                                                                                                                                                       |
|-----------------------|----------------------|----------------|----------------------------------------------------------------------------------------------------------------------------------------------------------------------------------|
| 226423_at             | PAQR8                | 85315          | progesterin and adiponQ receptor family member VIII                                                                                                                              |
| 214203_s_at           | PRODH                | 5625           | proline dehydrogenase (oxidase) 1                                                                                                                                                |
| 205618_at             | PRRG1                | 5638           | proline rich Gla (G-carboxyglutamic acid) 1                                                                                                                                      |
| 212187_x_at           | PTGDS                | 5730           | prostaglandin D2 synthase 21kDa (brain)                                                                                                                                          |
| 207650_x_at           | PTGER1               | 5731           | prostaglandin E receptor 1 (subtype EP1), 42kDa                                                                                                                                  |
| 213933_at             | PTGER3               | 5733           | prostaglandin E receptor 3 (subtype EP3)                                                                                                                                         |
| 231323_at             | PSMB2                | 5690           | proteasome (prosome, macropain) subunit, beta type, 2                                                                                                                            |
| 229453_at             | PDIA3                | 2923           | Protein disulfide isomerase family A, member 3                                                                                                                                   |
| 208658_at             | PDIA4                | 9601           | protein disulfide isomerase family A, member 4                                                                                                                                   |
| 226101_at             | PRKCE                | 5581           | protein kinase C, epsilon                                                                                                                                                        |
| 237107_at             | PRKRA ///<br>PRKRAP1 |                | protein kinase, interferon-inducible double stranded RNA dependent activator<br>/// protein kinase, interferon-inducible double stranded RNA dependent<br>activator pseudogene 1 |
| 225203_at             | PPP1R16A             | 84988          | protein phosphatase 1, regulatory (inhibitor) subunit 16A                                                                                                                        |
| 1569323_at            | PTPRG                | 5793           | protein tyrosine phosphatase, receptor type, G                                                                                                                                   |
| 1555579_s_at          | PTPRM                | 5797           | protein tyrosine phosphatase, receptor type, M                                                                                                                                   |
| 219654_at             | PTPLA                | 9200           | protein tyrosine phosphatase-like (proline instead of catalytic arginine),<br>member A                                                                                           |
| 232473_at             | PRPF18               | 8559           | PRP18 pre-mRNA processing factor 18 homolog (S. cerevisiae)                                                                                                                      |
| 240846_at             | PCBD2                | 84105          | pterin-4 alpha-carbinolamine dehydratase/dimerization cofactor of hepatocyte<br>nuclear factor 1 alpha (TCF1) 2                                                                  |
| 220005_at             | P2RY13               | 53829          | purinergic receptor P2Y, G-protein coupled, 13                                                                                                                                   |
| 206277_at             | P2RY2                | 5029           | purinergic receptor P2Y, G-protein coupled, 2                                                                                                                                    |
| 235634_at             | PURG                 | 29942          | purine-rich element binding protein G                                                                                                                                            |
| 1558290_a_at          | PVT1                 | 5820           | Pvt1 oncogene homolog (mouse)                                                                                                                                                    |
| 218018_at             | PD XK                | 8566           | pyridoxal (pyridoxine, vitamin B6) kinase                                                                                                                                        |
| 201251_at             | PKM2                 | 5315           | pyruvate kinase, muscle                                                                                                                                                          |
| 201482_at             | QSOX1                | 5768           | quiescin Q6 sulfhydryl oxidase 1                                                                                                                                                 |
| 202252_at             | RAB13                | 5872           | RAB13, member RAS oncogene family                                                                                                                                                |
| 219412_at             | RAB38                | 23682          | RAB38, member RAS oncogene family                                                                                                                                                |
| 230266_at             | RAB7B                | 338382         | RAB7B, member RAS oncogene family                                                                                                                                                |
| 214487_s_at           | RAP2A ///<br>RAP2B   |                | RAP2A, member of RAS oncogene family /// RAP2B, member of RAS<br>oncogene family                                                                                                 |
| 222810_s_at           | RASAL2               | 9462           | RAS protein activator like 2                                                                                                                                                     |
| 215620_at             | RREB1                | 6239           | ras responsive element binding protein 1                                                                                                                                         |
| 219167_at             | RASL12               | 51285          | RAS-like, family 12                                                                                                                                                              |
| 226597_at             | REEP6                | 92840          | receptor accessory protein 6                                                                                                                                                     |
| 212589_at             | RRAS2                | 22800          | related RAS viral (r-ras) oncogene homolog 2                                                                                                                                     |
| 220570_at             | RETN                 | 56729          | resistin                                                                                                                                                                         |
| 228550_at             | RTN4R                | 65078          | reticulon 4 receptor                                                                                                                                                             |
| 226638_at             | ARHGAP2<br>3         | 57636          | Rho GTPase activating protein 23                                                                                                                                                 |
| 202975_s_at           | RHOBTB3              | 22836          | Rho-related BTB domain containing 3                                                                                                                                              |
| 212912_at             | RPS6KA2              | 6196           | ribosomal protein S6 kinase, 90kDa, polypeptide 2                                                                                                                                |
| 207735_at             | RNF125               | 54941          | ring finger protein 125                                                                                                                                                          |
| 226106_at             | RNF141               | 50862          | ring finger protein 141                                                                                                                                                          |
| 205228_at             | RBMS2                | 5939           | RNA binding motif, single stranded interacting protein 2                                                                                                                         |
| 228802_at             | RBPM S2              | 348093         | RNA binding protein with multiple splicing 2                                                                                                                                     |
| 225743_at             | RPUSD3               | 285367         | RNA pseudouridylate synthase domain containing 3                                                                                                                                 |
| 218394_at             | ROGDI                | 79641          | rogdi homolog (Drosophila)                                                                                                                                                       |
| 213939_s_at           | RUFY3                | 22902          | RUN and FYVE domain containing 3                                                                                                                                                 |
| 202917_s_at           | S100A8               | 6279           | S100 calcium binding protein A8                                                                                                                                                  |

Supplemental Table 1. M3-specific dysregulome (510 genes)

| <b>Figure 2B<br/>Probeset</b> | <b>Gene<br/>Symbol</b> | <b>Entrez<br/>Gene</b> | <b>Gene Title</b>                                                                                   |
|-------------------------------|------------------------|------------------------|-----------------------------------------------------------------------------------------------------|
| 203535_at                     | S100A9                 | 6280                   | S100 calcium binding protein A9                                                                     |
| 209686_at                     | S100B                  | 6285                   | S100 calcium binding protein B                                                                      |
| 201825_s_at                   | SCCPDH                 | 51097                  | saccharopine dehydrogenase (putative)                                                               |
| 206671_at                     | SAG                    | 6295                   | S-antigen; retina and pineal gland (arrestin)                                                       |
| 202375_at                     | SEC24D                 | 9871                   | SEC24 related gene family, member D ( <i>S. cerevisiae</i> )                                        |
| 209875_s_at                   | SPP1                   | 6696                   | secreted phosphoprotein 1 (osteopontin, bone sialoprotein I, early T-lymphocyte activation 1)       |
| 203021_at                     | SLPI                   | 6590                   | secretory leukocyte peptidase inhibitor                                                             |
| 219689_at                     | SEMA3G                 | 56920                  | sema domain, immunoglobulin domain (Ig), short basic domain, secreted, (semaphorin) 3G              |
| 224407_s_at                   | RP6-213H19.1           | 51765                  | serine/threonine protein kinase MST4                                                                |
| 220030_at                     | STYK1                  | 55359                  | serine/threonine/tyrosine kinase 1                                                                  |
| 202628_s_at                   | SERPINE1               | 5054                   | serpin peptidase inhibitor, clade E (nexin, plasminogen activator inhibitor type 1), member 1       |
| 200986_at                     | SERPING1               | 710                    | serpin peptidase inhibitor, clade G (C1 inhibitor), member 1, (angioedema, hereditary)              |
| 207714_s_at                   | SERPINH1               | 871                    | serpin peptidase inhibitor, clade H (heat shock protein 47), member 1, (collagen binding protein 1) |
| 212921_at                     | SMYD2                  | 56950                  | SET and MYND domain containing 2                                                                    |
| 224817_at                     | SH3PXD2A               | 9644                   | SH3 and PX domains 2A                                                                               |
| 220059_at                     | STAP1                  | 26228                  | signal transducing adaptor family member 1                                                          |
| 244889_at                     | LOC388210              | 388210                 | Similar to LD15094p                                                                                 |
| 204900_x_at                   | SAP30                  | 8819                   | Sin3A-associated protein, 30kDa                                                                     |
| 203787_at                     | SSBP2                  | 23635                  | single-stranded DNA binding protein 2                                                               |
| 221562_s_at                   | SIRT3                  | 23410                  | sirtuin (silent mating type information regulation 2 homolog) 3 ( <i>S. cerevisiae</i> )            |
| 206634_at                     | SIX3                   | 6496                   | SIX homeobox 3                                                                                      |
| 232636_at                     | SLITRK4                | 139065                 | SLIT and NTRK-like family, member 4                                                                 |
| 232020_at                     | SMURF2                 | 64750                  | SMAD specific E3 ubiquitin protein ligase 2                                                         |
| 219480_at                     | SNAI1                  | 6615                   | snail homolog 1 ( <i>Drosophila</i> )                                                               |
| 237106_at                     | SLC11A2                | 4891                   | Solute carrier family 11 (proton-coupled divalent metal ion transporters), member 2                 |
| 219593_at                     | SLC15A3                | 51296                  | solute carrier family 15, member 3                                                                  |
| 207057_at                     | SLC16A7                | 9194                   | solute carrier family 16, member 7 (monocarboxylic acid transporter 2)                              |
| 204430_s_at                   | SLC2A5                 | 6518                   | solute carrier family 2 (facilitated glucose/fructose transporter), member 5                        |
| 219090_at                     | SLC24A3                | 57419                  | solute carrier family 24 (sodium/potassium/calcium exchanger), member 3                             |
| 225305_at                     | SLC25A29               | 123096                 | solute carrier family 25, member 29                                                                 |
| 205097_at                     | SLC26A2                | 1836                   | solute carrier family 26 (sulfate transporter), member 2                                            |
| 220475_at                     | SLC28A3                | 64078                  | solute carrier family 28 (sodium-coupled nucleoside transporter), member 3                          |
| 238418_at                     | SLC35B4                | 84912                  | solute carrier family 35, member B4                                                                 |
| 234976_x_at                   | SLC4A5                 | 57835                  | Solute carrier family 4, sodium bicarbonate cotransporter, member 5                                 |
| 201195_s_at                   | SLC7A5                 | 8140                   | solute carrier family 7 (cationic amino acid transporter, y+ system), member 5                      |
| 220129_at                     | SOHLH2                 | 54937                  | spermatogenesis and oogenesis specific basic helix-loop-helix 2                                     |
| 228654_at                     | SPIN4                  | 139886                 | spindlin family, member 4                                                                           |
| 224995_at                     | SPIRE1                 | 56907                  | spire homolog 1 ( <i>Drosophila</i> )                                                               |
| 243361_at                     | SFRS12                 | 140890                 | splicing factor, arginine/serine-rich 12                                                            |

Supplemental Table 1. M3-specific dysregulome (510 genes)

| <b>Figure 2B<br/>Probeset</b> | <b>Gene<br/>Symbol</b> | <b>Entrez<br/>Gene</b> | <b>Gene Title</b>                                                                                      |
|-------------------------------|------------------------|------------------------|--------------------------------------------------------------------------------------------------------|
| 218638_s_at                   | SPON2                  | 10417                  | spondin 2, extracellular matrix protein                                                                |
| 225639_at                     | SKAP2                  | 8935                   | src kinase associated phosphoprotein 2                                                                 |
| 213355_at                     | ST3GAL6                | 10402                  | ST3 beta-galactoside alpha-2,3-sialyltransferase 6                                                     |
| 204150_at                     | STAB1                  | 23166                  | stabilin 1                                                                                             |
| 38487_at                      | STAB1                  | 23166                  | stabilin 1                                                                                             |
| 231891_at                     | STAMBPL1               | 57559                  | STAM binding protein-like 1                                                                            |
| 225662_at                     | ZAK                    | 51776                  | sterile alpha motif and leucine zipper containing kinase AZK                                           |
| 204548_at                     | STAR                   | 6770                   | steroidogenic acute regulatory protein                                                                 |
| 201061_s_at                   | STOM                   | 2040                   | stomatin                                                                                               |
| 212926_at                     | SMC5                   | 23137                  | structural maintenance of chromosomes 5                                                                |
| 202260_s_at                   | STXBP1                 | 6812                   | syntaxin binding protein 1                                                                             |
| 208608_s_at                   | SNTB1                  | 6641                   | syntrophin, beta 1 (dystrophin-associated protein A1, 59kDa, basic component 1)                        |
| 216920_s_at                   | TARP ///<br>TRGC2      |                        | T cell receptor gamma constant 2 /// TCR gamma alternate reading frame protein                         |
| 233719_s_at                   | TASP1                  | 55617                  | taspase, threonine aspartase, 1                                                                        |
| 222116_s_at                   | TBC1D16                | 125058                 | TBC1 domain family, member 16                                                                          |
| 227632_at                     | TBC1D24                | 57465                  | TBC1 domain family, member 24                                                                          |
| 206301_at                     | TEC                    | 7006                   | tec protein tyrosine kinase                                                                            |
| 218872_at                     | TESC                   | 54997                  | tescalcin                                                                                              |
| 223838_at                     | TSGA10                 | 80705                  | testis specific, 10                                                                                    |
| 214606_at                     | TSPAN2                 | 10100                  | tetraspanin 2                                                                                          |
| 219587_at                     | TTC12                  | 54970                  | tetratricopeptide repeat domain 12                                                                     |
| 219838_at                     | TTC23                  | 64927                  | tetratricopeptide repeat domain 23                                                                     |
| 215146_s_at                   | TTC28                  | 23331                  | tetratricopeptide repeat domain 28                                                                     |
| 225308_s_at                   | TANC1                  | 85461                  | tetratricopeptide repeat, ankyrin repeat and coiled-coil containing 1                                  |
| 203313_s_at                   | TGIF1                  | 7050                   | TGFB-induced factor homeobox 1                                                                         |
| 229253_at                     | THEM4                  | 117145                 | thioesterase superfamily member 4                                                                      |
| 220384_at                     | TXNDC3                 | 51314                  | thioredoxin domain containing 3 (spermatzoa)                                                           |
| 219477_s_at                   | THSD1 ///<br>THSD1P    |                        | thrombospondin, type I, domain containing 1 /// thrombospondin, type I, domain containing 1 pseudogene |
| 201666_at                     | TIMP1                  | 7076                   | TIMP metalloproteinase inhibitor 1                                                                     |
| 204043_at                     | TCN2                   | 6948                   | transcobalamin II; macrocytic anemia                                                                   |
| 222317_at                     | ---                    |                        | Transcribed locus                                                                                      |
| 226192_at                     | ---                    |                        | Transcribed locus                                                                                      |
| 230391_at                     | ---                    |                        | Transcribed locus                                                                                      |
| 230408_at                     | ---                    |                        | Transcribed locus                                                                                      |
| 230684_at                     | ---                    |                        | Transcribed locus                                                                                      |
| 231550_at                     | ---                    |                        | Transcribed locus                                                                                      |
| 237945_at                     | ---                    |                        | Transcribed locus                                                                                      |
| 1555348_at                    | TFAP2E                 | 339488                 | transcription factor AP-2 epsilon (activating enhancer binding protein 2 epsilon)                      |
| 238520_at                     | TRERF1                 | 55809                  | transcriptional regulating factor 1                                                                    |
| 203221_at                     | TLE1                   | 7088                   | transducin-like enhancer of split 1 (E(sp1) homolog, Drosophila)                                       |
| 244716_x_at                   | TMIGD2                 | 126259                 | transmembrane and immunoglobulin domain containing 2                                                   |
| 1554077_a_at                  | TMEM53                 | 79639                  | transmembrane protein 53                                                                               |
| 215583_at                     | TMEM63A                | 9725                   | Transmembrane protein 63A                                                                              |
| 223771_at                     | TMEM87A                | 25963                  | Transmembrane protein 87A                                                                              |
| 235245_at                     | TMEM92                 | 162461                 | transmembrane protein 92                                                                               |
| 223814_at                     | TRNT1                  | 51095                  | tRNA nucleotidyl transferase, CCA-adding, 1                                                            |
| 241402_at                     | TSEN54                 | 283989                 | tRNA splicing endonuclease 54 homolog (S. cerevisiae)                                                  |
| 203476_at                     | TPBG                   | 7162                   | trophoblast glycoprotein                                                                               |

Supplemental Table 1. M3-specific dysregulome (510 genes)

| <b>Figure 2B<br/>Probeset</b> | <b>Gene<br/>Symbol</b> | <b>Entrez<br/>Gene</b> | <b>Gene Title</b>                                                                              |
|-------------------------------|------------------------|------------------------|------------------------------------------------------------------------------------------------|
| 209344_at                     | TPM4                   | 7171                   | tropomyosin 4                                                                                  |
| 215111_s_at                   | TSC22D1                | 8848                   | TSC22 domain family, member 1                                                                  |
| 239742_at                     | TULP4                  | 56995                  | Tubby like protein 4                                                                           |
| 209191_at                     | TUBB6                  | 84617                  | tubulin, beta 6                                                                                |
| 228285_at                     | TDRD9                  | 122402                 | tudor domain containing 9                                                                      |
| 207113_s_at                   | TNF                    | 7124                   | tumor necrosis factor (TNF superfamily, member 2)                                              |
| 203508_at                     | TNFRSF1B               | 7133                   | tumor necrosis factor receptor superfamily, member 1B                                          |
| 214228_x_at                   | TNFRSF4                | 7293                   | tumor necrosis factor receptor superfamily, member 4                                           |
| 202286_s_at                   | TACSTD2                | 4070                   | tumor-associated calcium signal transducer 2                                                   |
| 213943_at                     | TWIST1                 | 7291                   | twist homolog 1 (acrocephalosyndactyly 3; Saethre-Chotzen syndrome) (Drosophila)               |
| 206828_at                     | TXK                    | 7294                   | TXK tyrosine kinase                                                                            |
| 238057_at                     | USP45                  | 85015                  | ubiquitin specific peptidase 45                                                                |
| 232621_at                     | USP48                  | 84196                  | ubiquitin specific peptidase 48                                                                |
| 236597_at                     | UGT3A1                 | 133688                 | UDP glycosyltransferase 3 family, polypeptide A1                                               |
| 203188_at                     | B3GNT1                 | 11041                  | UDP-GlcNAc:betaGal beta-1,3-N-acetylglucosaminyltransferase 1                                  |
| 219956_at                     | GALNT6                 | 11226                  | UDP-N-acetyl-alpha-D-galactosamine:polypeptide N-acetylgalactosaminyltransferase 6 (GalNAc-T6) |
| 1562434_at                    | UNK                    | 85451                  | unkempt homolog (Drosophila)                                                                   |
| 205844_at                     | VNN1                   | 8876                   | vanin 1                                                                                        |
| 235818_at                     | VSTM1                  | 284415                 | V-set and transmembrane domain containing 1                                                    |
| 219251_s_at                   | WDR60                  | 55112                  | WD repeat domain 60                                                                            |
| 243526_at                     | WDR86                  | 349136                 | WD repeat domain 86                                                                            |
| 206067_s_at                   | WT1                    | 7490                   | Wilms tumor 1                                                                                  |
| 218775_s_at                   | WWC2                   | 80014                  | WW and C2 domain containing 2                                                                  |
| 213996_at                     | YPEL1                  | 29799                  | yippee-like 1 (Drosophila)                                                                     |
| 223382_s_at                   | ZNRF1                  | 84937                  | zinc and ring finger 1                                                                         |
| 226137_at                     | ZFH3                   | 463                    | zinc finger homeobox 3                                                                         |
| 205739_x_at                   | ZNF107                 | 51427                  | zinc finger protein 107                                                                        |
| 234394_at                     | ZNF124                 | 7678                   | zinc finger protein 124                                                                        |
| 235728_at                     | ZFP3                   | 124961                 | zinc finger protein 3 homolog (mouse)                                                          |
| 222016_s_at                   | ZNF323                 | 64288                  | zinc finger protein 323                                                                        |
| 205514_at                     | ZNF415                 | 55786                  | zinc finger protein 415                                                                        |
| 205964_at                     | ZNF426                 | 79088                  | zinc finger protein 426                                                                        |
| 235176_at                     | ZNF545                 | 284406                 | zinc finger protein 545                                                                        |
| 223680_at                     | ZNF607                 | 84775                  | zinc finger protein 607                                                                        |
| 212620_at                     | ZNF609                 | 23060                  | zinc finger protein 609                                                                        |
| 228864_at                     | ZNF653                 | 115950                 | zinc finger protein 653                                                                        |
| 227080_at                     | ZNF697                 | 90874                  | zinc finger protein 697                                                                        |
| 228988_at                     | ZNF711                 | 7552                   | zinc finger protein 711                                                                        |
| 206059_at                     | ZNF91                  | 7644                   | zinc finger protein 91                                                                         |
| 1562303_at                    | ZKSCAN3                | 80317                  | zinc finger with KRAB and SCAN domains 3                                                       |
| 219247_s_at                   | ZDHHC14                | 79683                  | zinc finger, DHHC-type containing 14                                                           |
| 240859_at                     | ZFYVE16                | 9765                   | zinc finger, FYVE domain containing 16                                                         |
| 219628_at                     | ZMAT3                  | 64393                  | zinc finger, matrin type 3                                                                     |
| 210282_at                     | ZMYM2                  | 7750                   | zinc finger, MYM-type 2                                                                        |
| 207130_at                     | ZMYND8                 | 23613                  | zinc finger, MYND-type containing 8                                                            |

**Supplemental Table 2.** Data from nCounter assays of AML samples and normal CD34+, promyelocytes, and neutrophils (PMNs).

| Accession No.  | Gene Name/Sample ID | M0    | M0    | M0    | M1   | M1   | M1   | M1   | M1   |
|----------------|---------------------|------|------|------|------|------|------|------|------|------|-------|-------|-------|------|------|------|------|------|
|                |                     | 4528 | 4528 | 4528 | 4532 | 4532 | 4532 | 6742 | 6742 | 6742 | 17366 | 17366 | 17366 | 4534 | 4534 | 4534 | 6747 | 6747 |
| NM_002841.2    | PTPRG               | 5    | 2    | 4    | 0    | 1    | 0    | 2    | 2    | 0    | 3     | 0     | 3     | 1    | 0    | 2    | 2    | 0    |
| NM_145256.2    | LRRC25              | 176  | 175  | 165  | 2    | 1    | 3    | 3    | 3    | 2    | 9     | 10    | 8     | 23   | 22   | 21   | 8    | 3    |
| NM_001972.2    | ELA2                | 5    | 2    | 2    | 0    | 4    | 0    | 2    | 2    | 1    | 24    | 23    | 22    | 174  | 188  | 150  | 38   | 33   |
| NM_000597.2    | IGFBP2              | 25   | 12   | 23   | 0    | 1    | 0    | 9    | 5    | 6    | 8     | 1     | 5     | 90   | 79   | 66   | 131  | 98   |
| NM_005413.1    | SIX3                | 5    | 17   | 0    | 7    | 1    | 1    | 2    | 1    | 1    | 8     | 4     | 3     | 3    | 0    | 2    | 2    | 0    |
| NM_006272.1    | S100B               | 7    | 3    | 8    | 1    | 0    | 6    | 6    | 4    | 6    | 14    | 20    | 11    | 3    | 4    | 3    | 2    | 0    |
| NM_003327.2    | TNFRSF4             | 5    | 3    | 0    | 0    | 1    | 1    | 0    | 3    | 1    | 3     | 0     | 4     | 1    | 2    | 3    | 2    | 5    |
| NM_004049.2    | BCL2A1              | 356  | 363  | 334  | 17   | 15   | 10   | 86   | 76   | 75   | 42    | 44    | 35    | 69   | 61   | 57   | 17   | 20   |
| NM_001911.2    | CTSG                | 7    | 5    | 4    | 1    | 0    | 3    | 0    | 1    | 1    | 45    | 30    | 42    | 456  | 481  | 469  | 29   | 45   |
| NM_001557.2    | IL8RB               | 36   | 47   | 36   | 6    | 1    | 1    | 3    | 1    | 4    | 9     | 10    | 11    | 15   | 9    | 14   | 0    | 3    |
| NM_001066.2    | TNFRSF1B            | 845  | 862  | 760  | 9    | 5    | 7    | 19   | 11   | 11   | 35    | 49    | 43    | 115  | 139  | 101  | 38   | 30   |
| NM_002046.3    | GAPDH               | 3533 | 3587 | 3208 | 1929 | 1762 | 1790 | 4100 | 3649 | 3447 | 2494  | 2367  | 2687  | 4885 | 5088 | 4813 | 5798 | 5066 |
| NM_006169.2    | NNMT                | 2    | 2    | 4    | 0    | 2    | 3    | 2    | 2    | 1    | 3     | 6     | 5     | 6    | 3    | 1    | 12   | 10   |
| NM_015381.3    | FAM19A5             | 2    | 0    | 0    | 4    | 0    | 1    | 1    | 1    | 1    | 1     | 0     | 1     | 2    | 0    | 0    | 0    | 0    |
| NM_015136.2    | STAB1               | 194  | 195  | 178  | 7    | 7    | 8    | 156  | 112  | 114  | 14    | 19    | 26    | 151  | 115  | 123  | 21   | 18   |
| NM_002029.3    | FPR1                | 282  | 255  | 283  | 4    | 1    | 3    | 5    | 8    | 5    | 10    | 19    | 15    | 38   | 29   | 19   | 27   | 8    |
| NM_003930.3    | SCAP2               | 52   | 45   | 32   | 21   | 19   | 25   | 12   | 15   | 15   | 14    | 10    | 14    | 19   | 32   | 21   | 33   | 25   |
| NM_006486.2    | FBLN1               | 2    | 2    | 0    | 0    | 0    | 1    | 0    | 0    | 0    | 1     | 1     | 0     | 0    | 0    | 1    | 0    | 0    |
| NM_153206.1    | AMICA1              | 2    | 5    | 2    | 0    | 0    | 0    | 1    | 1    | 0    | 3     | 0     | 1     | 1    | 1    | 0    | 0    | 0    |
| NM_002965.2    | S100A9              | 6135 | 6132 | 5334 | 11   | 6    | 3    | 290  | 231  | 214  | 873   | 809   | 849   | 895  | 792  | 794  | 602  | 684  |
| NM_021209.3    | CARD12/NLRC4        | 56   | 33   | 38   | 2    | 1    | 10   | 2    | 2    | 4    | 13    | 9     | 12    | 13   | 9    | 9    | 4    | 5    |
| NM_000433.2    | NCF2                | 933  | 1005 | 861  | 4    | 2    | 6    | 13   | 9    | 9    | 90    | 104   | 103   | 105  | 128  | 102  | 27   | 20   |
| NM_003489.2    | NRIP1               | 74   | 65   | 56   | 54   | 56   | 51   | 1    | 3    | 2    | 36    | 30    | 26    | 33   | 17   | 19   | 35   | 28   |
| NM_001040084.1 | LOC653107/ANXA8     | 2    | 2    | 4    | 0    | 1    | 0    | 2    | 1    | 1    | 3     | 0     | 1     | 2    | 0    | 0    | 4    | 0    |
| NM_016582.1    | SLC15A3             | 83   | 83   | 114  | 0    | 1    | 6    | 1    | 3    | 1    | 19    | 9     | 14    | 8    | 9    | 8    | 8    | 5    |
| NM_000211.2    | ITGB2               | 1710 | 1648 | 1340 | 109  | 85   | 117  | 147  | 134  | 129  | 196   | 151   | 174   | 418  | 427  | 382  | 346  | 298  |
| NM_000601.4    | HGF                 | 56   | 35   | 53   | 31   | 29   | 32   | 31   | 41   | 30   | 9     | 13    | 15    | 2    | 2    | 4    | 62   | 78   |
| NM_001042729.1 | FGR                 | 1649 | 1506 | 1370 | 9    | 1    | 8    | 90   | 86   | 67   | 101   | 87    | 124   | 339  | 306  | 270  | 44   | 35   |
| NM_001614.2    | ACTG1               | 4209 | 4072 | 3381 | 2051 | 1782 | 1754 | 2154 | 1778 | 1840 | 2854  | 2726  | 2720  | 4114 | 3423 | 3280 | 2949 | 3035 |
| NM_138444.2    | KCTD12              | 264  | 260  | 221  | 1    | 1    | 4    | 2    | 8    | 7    | 17    | 14    | 14    | 36   | 34   | 30   | 8    | 13   |
| NM_002964.3    | S100A8              | 9494 | 9373 | 8823 | 21   | 23   | 19   | 637  | 531  | 509  | 2010  | 2096  | 1911  | 1532 | 1347 | 1274 | 1121 | 1165 |
| NM_001025109.1 | CD34                | 18   | 17   | 11   | 131  | 123  | 128  | 159  | 151  | 116  | 22    | 20    | 20    | 2    | 2    | 1    | 17   | 13   |
| NM_000474.3    | TWIST1              | 2    | 3    | 6    | 1    | 0    | 0    | 2    | 0    | 1    | 0     | 3     | 3     | 3    | 4    | 2    | 2    | 5    |
| NM_015869.3    | PPARG               | 7    | 8    | 9    | 0    | 1    | 0    | 2    | 0    | 1    | 1     | 1     | 3     | 4    | 5    | 2    | 0    | 10   |
| NM_004666.1    | VNN1                | 9    | 12   | 11   | 4    | 2    | 4    | 3    | 1    | 3    | 1     | 3     | 0     | 17   | 12   | 21   | 2    | 8    |
| NM_005874.1    | LILRB2              | 509  | 516  | 490  | 39   | 44   | 39   | 37   | 34   | 27   | 32    | 49    | 37    | 98   | 77   | 86   | 12   | 15   |
| NM_001005463.1 | EBF3                | 2    | 5    | 4    | 6    | 2    | 1    | 5    | 3    | 2    | 0     | 3     | 3     | 3    | 5    | 2    | 8    | 0    |
| NM_152852.1    | MS4A6A              | 79   | 68   | 53   | 1    | 4    | 0    | 2    | 1    | 1    | 15    | 9     | 18    | 8    | 8    | 6    | 0    | 0    |

**Supplemental Table 2.** Data from nCounter assays of AML samples and normal CD34+, promyelocytes, and neutrophils (PMNs).

| Accession No. | Gene Name/Sample ID | M0    | M0    | M0    | M1   | M1   | M1   | M1   | M1   |
|---------------|---------------------|------|------|------|------|------|------|------|------|------|-------|-------|-------|------|------|------|------|------|
|               |                     | 4528 | 4528 | 4528 | 4532 | 4532 | 4532 | 6742 | 6742 | 6742 | 17366 | 17366 | 17366 | 4534 | 4534 | 4534 | 6747 | 6747 |
| NM_000954.5   | PTGDS               | 0    | 0    | 0    | 2    | 0    | 0    | 0    | 0    | 1    | 0     | 3     | 0     | 1    | 0    | 0    | 2    | 8    |
| NM_000222.1   | KIT                 | 5    | 12   | 2    | 66   | 67   | 60   | 24   | 24   | 22   | 4     | 6     | 9     | 38   | 52   | 57   | 60   | 83   |
| NM_004961.3   | GABRE               | 0    | 2    | 2    | 2    | 0    | 3    | 2    | 1    | 0    | 1     | 0     | 1     | 3    | 2    | 1    | 2    | 0    |
| NM_007261.2   | CD300A              | 11   | 17   | 9    | 6    | 10   | 6    | 9    | 3    | 8    | 56    | 53    | 57    | 9    | 8    | 11   | 4    | 8    |
| NM_002115.1   | HK3                 | 99   | 75   | 64   | 1    | 1    | 0    | 2    | 1    | 1    | 8     | 4     | 9     | 10   | 9    | 12   | 2    | 3    |
| NM_023914.2   | P2RY13              | 340  | 316  | 291  | 17   | 11   | 10   | 6    | 16   | 8    | 18    | 11    | 11    | 55   | 52   | 44   | 40   | 35   |
| NM_033642.1   | FGF13               | 0    | 2    | 0    | 1    | 1    | 1    | 1    | 1    | 1    | 1     | 1     | 0     | 1    | 1    | 0    | 2    | 5    |

|            |                 |      |      |      |      |      |      |      |      |      |      |      |      |      |      |      |      |      |
|------------|-----------------|------|------|------|------|------|------|------|------|------|------|------|------|------|------|------|------|------|
| AF324996.2 | Athal_Spike_S23 | 1829 | 1841 | 1822 | 1853 | 1765 | 1800 | 1846 | 1855 | 1837 | 1832 | 1873 | 1858 | 1806 | 1871 | 1823 | 1924 | 1796 |
| AF325027.2 | Athal_Spike_S14 | 692  | 759  | 762  | 726  | 775  | 755  | 730  | 728  | 715  | 746  | 759  | 738  | 731  | 729  | 716  | 667  | 739  |
| AF325042.2 | Athal_Spike_S19 | 527  | 479  | 505  | 518  | 546  | 533  | 532  | 518  | 519  | 497  | 493  | 502  | 548  | 504  | 569  | 506  | 510  |
| AY058560.1 | DrosSpike8      | 194  | 158  | 189  | 179  | 158  | 202  | 171  | 165  | 184  | 195  | 181  | 180  | 181  | 183  | 175  | 175  | 219  |
| AF325027.2 | Athal_Spike_S13 | 95   | 72   | 58   | 79   | 94   | 68   | 69   | 87   | 78   | 82   | 64   | 78   | 66   | 80   | 71   | 92   | 78   |
| AF324998.2 | Athal_Spike_S22 | 81   | 98   | 96   | 77   | 100  | 88   | 84   | 83   | 91   | 88   | 67   | 73   | 87   | 72   | 76   | 79   | 91   |
| AY058658.1 | DrosSpike7      | 32   | 37   | 23   | 33   | 27   | 14   | 31   | 27   | 36   | 21   | 24   | 30   | 42   | 23   | 28   | 29   | 33   |
| AF325032.2 | Athal_Spike_S17 | 34   | 40   | 28   | 25   | 23   | 24   | 26   | 23   | 27   | 24   | 27   | 28   | 26   | 26   | 31   | 21   | 25   |
| DQ412624   | SarsSpike3      | 7    | 15   | 13   | 5    | 7    | 11   | 7    | 6    | 6    | 8    | 3    | 7    | 10   | 8    | 6    | 4    | 5    |
| AY058658.1 | DrosSpike6      | 9    | 0    | 4    | 4    | 4    | 6    | 2    | 6    | 6    | 5    | 7    | 4    | 1    | 3    | 3    | 2    | 3    |
| AY058560.1 | DrosSpike10     | 2    | 2    | 2    | 0    | 2    | 0    | 2    | 0    | 1    | 4    | 0    | 1    | 2    | 0    | 1    | 4    | 3    |
| AY058658.1 | DrosSpike11     | 2    | 0    | 2    | 1    | 5    | 0    | 0    | 2    | 0    | 0    | 0    | 3    | 2    | 3    | 0    | 2    | 0    |
| AF325014.2 | Athal_Spike_S12 | 2    | 3    | 0    | 4    | 6    | 3    | 3    | 2    | 5    | 4    | 1    | 9    | 5    | 3    | 3    | 2    | 0    |
| AF325016.2 | Athal_Spike_S15 | 5    | 2    | 0    | 6    | 1    | 8    | 4    | 2    | 3    | 3    | 3    | 3    | 3    | 2    | 3    | 2    | 5    |
| AF325016.2 | Athal_Spike_S16 | 2    | 5    | 8    | 2    | 1    | 3    | 2    | 2    | 1    | 5    | 1    | 0    | 3    | 4    | 3    | 0    | 0    |
| AF325032.2 | Athal_Spike_S18 | 7    | 5    | 2    | 2    | 1    | 0    | 3    | 2    | 0    | 3    | 1    | 1    | 2    | 2    | 2    | 2    | 0    |
| AF324998.2 | Athal_Spike_S20 | 2    | 2    | 2    | 0    | 4    | 6    | 0    | 2    | 3    | 9    | 1    | 3    | 4    | 2    | 2    | 8    | 5    |
| AF324998.2 | Athal_Spike_S21 | 0    | 5    | 0    | 2    | 2    | 4    | 3    | 3    | 3    | 8    | 6    | 1    | 4    | 2    | 2    | 2    | 3    |
| AF324998.2 | Athal_Spike_S24 | 0    | 10   | 6    | 2    | 2    | 6    | 0    | 1    | 1    | 4    | 4    | 3    | 4    | 2    | 5    | 6    | 3    |
| DQ412624   | SarsSpike4      | 5    | 3    | 0    | 2    | 0    | 1    | 7    | 1    | 4    | 5    | 6    | 1    | 3    | 2    | 6    | 0    | 0    |
| AY058560.1 | DrosSpike9      | 5    | 2    | 0    | 2    | 2    | 1    | 2    | 1    | 1    | 0    | 0    | 0    | 3    | 1    | 0    | 2    | 3    |



**Supplemental Table 2.** Data from nCounter assays of AML samples and normal CD34+, promyelocytes, and neutrophils (PMNs).

| Accession No.  | Gene Name/Sample ID | M1   | M1    | M1    | M1    | M1    | M1    | M1    | M1    | M1    | M1    | M2   | M2   | M2   | M2   | M2   | M2   |
|----------------|---------------------|------|-------|-------|-------|-------|-------|-------|-------|-------|-------|------|------|------|------|------|------|
|                |                     | 6747 | 15599 | 15599 | 15599 | 16066 | 16066 | 16066 | 20900 | 20900 | 20900 | 4530 | 4530 | 4530 | 4983 | 4983 | 4983 |
| NM_002841.2    | PTPRG               | 2    | 1     | 0     | 0     | 0     | 2     | 3     | 0     | 0     | 1     | 1    | 1    | 3    | 2    | 2    | 2    |
| NM_145256.2    | LRRC25              | 0    | 63    | 29    | 38    | 5     | 3     | 4     | 2     | 3     | 2     | 4    | 5    | 7    | 23   | 18   | 19   |
| NM_001972.2    | ELA2                | 40   | 25    | 15    | 7     | 3     | 2     | 2     | 3     | 1     | 3     | 49   | 58   | 64   | 124  | 75   | 96   |
| NM_000597.2    | IGFBP2              | 125  | 39    | 18    | 22    | 11    | 3     | 11    | 11    | 30    | 18    | 2    | 2    | 7    | 4    | 7    | 7    |
| NM_005413.1    | SIX3                | 0    | 0     | 0     | 4     | 1     | 0     | 2     | 0     | 5     | 2     | 2    | 1    | 2    | 2    | 4    | 3    |
| NM_006272.1    | S100B               | 0    | 7     | 3     | 4     | 7     | 2     | 1     | 0     | 2     | 5     | 5    | 6    | 4    | 2    | 2    | 3    |
| NM_003327.2    | TNFRSF4             | 0    | 0     | 2     | 0     | 2     | 0     | 1     | 1     | 2     | 1     | 2    | 0    | 2    | 0    | 3    | 1    |
| NM_004049.2    | BCL2A1              | 35   | 14    | 21    | 18    | 8     | 12    | 5     | 9     | 13    | 8     | 26   | 46   | 19   | 78   | 78   | 83   |
| NM_001911.2    | CTSG                | 38   | 524   | 549   | 469   | 408   | 414   | 363   | 54    | 22    | 37    | 10   | 14   | 16   | 223  | 182  | 248  |
| NM_001557.2    | IL8RB               | 5    | 10    | 11    | 5     | 1     | 2     | 0     | 1     | 0     | 1     | 7    | 6    | 3    | 21   | 15   | 23   |
| NM_001066.2    | TNFRSF1B            | 24   | 310   | 252   | 264   | 111   | 101   | 92    | 29    | 40    | 35    | 28   | 29   | 35   | 90   | 60   | 93   |
| NM_002046.3    | GAPDH               | 6083 | 5419  | 5985  | 4994  | 4404  | 4284  | 4310  | 3726  | 3595  | 3359  | 3401 | 3593 | 3512 | 2823 | 1890 | 2450 |
| NM_006169.2    | NNMT                | 12   | 1     | 2     | 2     | 1     | 2     | 2     | 7     | 3     | 2     | 1    | 1    | 2    | 1    | 1    | 2    |
| NM_015381.3    | FAM19A5             | 0    | 1     | 0     | 2     | 1     | 0     | 0     | 0     | 0     | 1     | 0    | 0    | 0    | 2    | 0    | 1    |
| NM_015136.2    | STAB1               | 24   | 34    | 30    | 25    | 9     | 3     | 4     | 3     | 1     | 1     | 35   | 39   | 22   | 73   | 52   | 65   |
| NM_002029.3    | FPR1                | 12   | 1     | 15    | 9     | 4     | 3     | 3     | 3     | 2     | 3     | 10   | 19   | 16   | 86   | 63   | 69   |
| NM_003930.3    | SCAP2               | 40   | 22    | 33    | 24    | 31    | 26    | 15    | 20    | 23    | 22    | 19   | 11   | 14   | 25   | 7    | 21   |
| NM_006486.2    | FBLN1               | 0    | 1     | 2     | 2     | 0     | 0     | 1     | 0     | 0     | 0     | 2    | 0    | 0    | 0    | 0    | 1    |
| NM_153206.1    | AMICA1              | 0    | 1     | 6     | 2     | 0     | 0     | 0     | 0     | 0     | 0     | 1    | 0    | 0    | 2    | 0    | 5    |
| NM_002965.2    | S100A9              | 654  | 654   | 665   | 529   | 140   | 120   | 108   | 2     | 2     | 3     | 319  | 365  | 375  | 1814 | 1322 | 1642 |
| NM_021209.3    | CARD12/NLRC4        | 2    | 35    | 41    | 36    | 10    | 9     | 11    | 5     | 5     | 2     | 9    | 5    | 7    | 9    | 8    | 12   |
| NM_000433.2    | NCF2                | 19   | 353   | 309   | 306   | 118   | 122   | 115   | 3     | 4     | 5     | 50   | 59   | 51   | 156  | 121  | 156  |
| NM_003489.2    | NRIP1               | 59   | 21    | 20    | 29    | 57    | 56    | 54    | 59    | 52    | 50    | 26   | 41   | 36   | 14   | 10   | 12   |
| NM_001040084.1 | LOC653107/ANXA8     | 5    | 1     | 8     | 2     | 4     | 5     | 6     | 2     | 3     | 2     | 3    | 10   | 6    | 2    | 0    | 2    |
| NM_016582.1    | SLC15A3             | 0    | 18    | 12    | 13    | 2     | 0     | 1     | 3     | 2     | 3     | 4    | 5    | 7    | 11   | 6    | 8    |
| NM_000211.2    | ITGB2               | 391  | 1030  | 1175  | 900   | 666   | 585   | 660   | 132   | 135   | 123   | 90   | 106  | 94   | 414  | 275  | 400  |
| NM_000601.4    | HGF                 | 75   | 186   | 154   | 186   | 9     | 16    | 11    | 56    | 59    | 49    | 203  | 214  | 233  | 5    | 3    | 8    |
| NM_001042729.1 | FGR                 | 38   | 601   | 616   | 561   | 47    | 40    | 63    | 11    | 6     | 5     | 63   | 78   | 83   | 331  | 267  | 310  |
| NM_001614.2    | ACTG1               | 3403 | 5348  | 4840  | 4460  | 5820  | 5376  | 5246  | 3142  | 3097  | 3123  | 2513 | 2689 | 2595 | 2029 | 1559 | 1813 |
| NM_138444.2    | KCTD12              | 9    | 34    | 23    | 9     | 4     | 7     | 2     | 3     | 9     | 7     | 22   | 17   | 22   | 16   | 19   | 25   |
| NM_002964.3    | S100A8              | 1426 | 1091  | 916   | 934   | 246   | 310   | 272   | 4     | 2     | 1     | 645  | 670  | 656  | 3456 | 2593 | 3002 |
| NM_001025109.1 | CD34                | 31   | 7     | 9     | 2     | 21    | 10    | 13    | 3     | 5     | 2     | 125  | 128  | 134  | 2    | 4    | 2    |
| NM_000474.3    | TWIST1              | 0    | 4     | 0     | 2     | 0     | 3     | 4     | 4     | 2     | 4     | 3    | 3    | 5    | 1    | 2    | 1    |
| NM_015869.3    | PPARG               | 0    | 1     | 14    | 13    | 2     | 0     | 1     | 1     | 1     | 1     | 1    | 2    | 0    | 4    | 8    | 5    |
| NM_004666.1    | VNN1                | 2    | 13    | 11    | 9     | 5     | 9     | 10    | 2     | 0     | 1     | 23   | 20   | 22   | 14   | 12   | 13   |
| NM_005874.1    | LILRB2              | 16   | 159   | 142   | 165   | 142   | 125   | 139   | 46    | 55    | 55    | 57   | 56   | 52   | 62   | 48   | 59   |
| NM_001005463.1 | EBF3                | 5    | 9     | 2     | 4     | 3     | 3     | 3     | 3     | 5     | 3     | 5    | 0    | 5    | 5    | 6    | 5    |
| NM_152852.1    | MS4A6A              | 2    | 73    | 78    | 63    | 5     | 9     | 2     | 1     | 6     | 3     | 12   | 17   | 20   | 10   | 5    | 5    |

**Supplemental Table 2.** Data from nCounter assays of AML samples and normal CD34+, promyelocytes, and neutrophils (PMNs).

| Accession No. | Gene Name/Sample ID | M1   | M1    | M1    | M1    | M1    | M1    | M1    | M1    | M1    | M1    | M2   | M2   | M2   | M2   | M2   | M2   |
|---------------|---------------------|------|-------|-------|-------|-------|-------|-------|-------|-------|-------|------|------|------|------|------|------|
|               |                     | 6747 | 15599 | 15599 | 15599 | 16066 | 16066 | 16066 | 20900 | 20900 | 20900 | 4530 | 4530 | 4530 | 4983 | 4983 | 4983 |
| NM_000954.5   | PTGDS               | 2    | 0     | 0     | 0     | 0     | 0     | 0     | 1     | 0     | 1     | 0    | 0    | 0    | 3    | 2    | 4    |
| NM_000222.1   | KIT                 | 99   | 22    | 18    | 11    | 15    | 12    | 5     | 59    | 74    | 71    | 41   | 54   | 40   | 12   | 6    | 9    |
| NM_004961.3   | GABRE               | 7    | 3     | 2     | 0     | 2     | 0     | 1     | 2     | 3     | 3     | 0    | 1    | 0    | 2    | 3    | 5    |
| NM_007261.2   | CD300A              | 7    | 10    | 14    | 11    | 13    | 12    | 8     | 0     | 7     | 9     | 4    | 4    | 1    | 7    | 7    | 5    |
| NM_002115.1   | HK3                 | 5    | 24    | 14    | 36    | 4     | 2     | 5     | 1     | 1     | 1     | 5    | 8    | 2    | 17   | 8    | 6    |
| NM_023914.2   | P2RY13              | 40   | 148   | 121   | 100   | 42    | 47    | 29    | 5     | 3     | 1     | 28   | 28   | 20   | 74   | 49   | 63   |
| NM_033642.1   | FGF13               | 2    | 1     | 0     | 2     | 0     | 0     | 4     | 0     | 1     | 0     | 0    | 0    | 1    | 1    | 1    | 1    |

|            |                 |      |      |      |      |      |      |      |      |      |      |      |      |      |      |      |      |
|------------|-----------------|------|------|------|------|------|------|------|------|------|------|------|------|------|------|------|------|
| AF324996.2 | Athal_Spike_S23 | 1859 | 1856 | 1870 | 1841 | 1840 | 1893 | 1875 | 1850 | 1803 | 1804 | 1824 | 1862 | 1825 | 1897 | 1764 | 1772 |
| AF325027.2 | Athal_Spike_S14 | 772  | 727  | 738  | 746  | 678  | 675  | 727  | 752  | 752  | 775  | 740  | 693  | 746  | 729  | 749  | 785  |
| AF325042.2 | Athal_Spike_S19 | 482  | 500  | 523  | 527  | 566  | 501  | 512  | 496  | 519  | 505  | 528  | 506  | 525  | 493  | 579  | 513  |
| AY058560.1 | DrosSpike8      | 174  | 185  | 155  | 183  | 198  | 188  | 180  | 173  | 204  | 188  | 180  | 185  | 163  | 161  | 172  | 190  |
| AF325027.2 | Athal_Spike_S13 | 85   | 66   | 63   | 67   | 72   | 77   | 67   | 70   | 60   | 71   | 79   | 73   | 73   | 77   | 82   | 80   |
| AF324998.2 | Athal_Spike_S22 | 71   | 97   | 72   | 80   | 88   | 108  | 64   | 91   | 94   | 82   | 83   | 97   | 102  | 71   | 90   | 87   |
| AY058658.1 | DrosSpike7      | 24   | 29   | 36   | 22   | 28   | 23   | 32   | 32   | 21   | 29   | 35   | 38   | 30   | 37   | 27   | 32   |
| AF325032.2 | Athal_Spike_S17 | 21   | 29   | 29   | 25   | 20   | 26   | 31   | 25   | 27   | 28   | 20   | 27   | 27   | 19   | 22   | 25   |
| DQ412624   | SarsSpike3      | 7    | 9    | 9    | 7    | 7    | 5    | 9    | 5    | 13   | 10   | 7    | 14   | 6    | 8    | 12   | 8    |
| AY058658.1 | DrosSpike6      | 5    | 1    | 3    | 2    | 3    | 3    | 2    | 3    | 6    | 5    | 2    | 5    | 4    | 7    | 3    | 8    |
| AY058560.1 | DrosSpike10     | 2    | 1    | 3    | 0    | 1    | 0    | 3    | 2    | 1    | 1    | 2    | 3    | 1    | 1    | 0    | 2    |
| AY058658.1 | DrosSpike11     | 2    | 0    | 0    | 0    | 3    | 2    | 0    | 0    | 3    | 1    | 0    | 1    | 1    | 2    | 2    | 1    |
| AF325014.2 | Athal_Spike_S12 | 0    | 1    | 5    | 2    | 6    | 5    | 4    | 2    | 6    | 6    | 5    | 3    | 1    | 2    | 3    | 3    |
| AF325016.2 | Athal_Spike_S15 | 2    | 7    | 5    | 2    | 3    | 2    | 10   | 5    | 5    | 4    | 4    | 5    | 7    | 3    | 4    | 3    |
| AF325016.2 | Athal_Spike_S16 | 0    | 1    | 2    | 5    | 4    | 2    | 1    | 0    | 1    | 3    | 4    | 2    | 2    | 3    | 0    | 2    |
| AF325032.2 | Athal_Spike_S18 | 0    | 0    | 2    | 0    | 1    | 2    | 4    | 1    | 3    | 2    | 2    | 3    | 3    | 6    | 6    | 1    |
| AF324998.2 | Athal_Spike_S20 | 2    | 3    | 5    | 2    | 2    | 2    | 3    | 3    | 3    | 3    | 2    | 3    | 6    | 4    | 4    | 4    |
| AF324998.2 | Athal_Spike_S21 | 0    | 5    | 5    | 4    | 5    | 2    | 1    | 2    | 2    | 4    | 0    | 2    | 2    | 5    | 5    | 5    |
| AF324998.2 | Athal_Spike_S24 | 2    | 1    | 3    | 0    | 5    | 2    | 4    | 0    | 2    | 5    | 0    | 3    | 2    | 2    | 3    | 3    |
| DQ412624   | SarsSpike4      | 2    | 3    | 0    | 2    | 5    | 2    | 1    | 6    | 4    | 5    | 2    | 6    | 3    | 5    | 6    | 5    |
| AY058560.1 | DrosSpike9      | 0    | 3    | 2    | 7    | 1    | 0    | 1    | 0    | 0    | 0    | 0    | 4    | 1    | 5    | 2    | 1    |

**Supplemental Table 2.** Data from nCounter assays of AML samples and normal CD34+, promyelocytes, and neutrophils (PMNs).

| Accession No.  | Gene Name/Sample ID | M2   | M2   | M2   | M2   | M2   | M2   | M3   |
|----------------|---------------------|------|------|------|------|------|------|------|------|------|------|------|------|------|------|------|------|------|------|
|                |                     | 6744 | 6744 | 6744 | 6746 | 6746 | 6746 | 3038 | 3038 | 3038 | 4537 | 4537 | 4537 | 6947 | 6947 | 6947 | 9062 | 9062 | 9062 |
| NM_002841.2    | PTPRG               | 2    | 0    | 0    | 1    | 0    | 1    | 9    | 15   | 10   | 13   | 13   | 9    | 24   | 19   | 34   | 8    | 10   | 12   |
| NM_145256.2    | LRRC25              | 2    | 5    | 3    | 6    | 7    | 4    | 12   | 8    | 15   | 1    | 3    | 2    | 2    | 0    | 2    | 3    | 4    | 4    |
| NM_001972.2    | ELA2                | 3    | 4    | 2    | 95   | 107  | 87   | 239  | 263  | 283  | 109  | 91   | 101  | 325  | 245  | 353  | 438  | 351  | 372  |
| NM_000597.2    | IGFBP2              | 23   | 24   | 22   | 13   | 16   | 9    | 115  | 95   | 106  | 319  | 350  | 341  | 435  | 336  | 516  | 525  | 491  | 537  |
| NM_005413.1    | SIX3                | 3    | 7    | 7    | 7    | 8    | 4    | 16   | 16   | 12   | 24   | 27   | 27   | 4    | 4    | 9    | 21   | 22   | 18   |
| NM_006272.1    | S100B               | 3    | 19   | 14   | 8    | 19   | 7    | 23   | 32   | 25   | 134  | 126  | 135  | 43   | 26   | 43   | 196  | 165  | 213  |
| NM_003327.2    | TNFRSF4             | 0    | 1    | 3    | 1    | 0    | 1    | 0    | 5    | 0    | 20   | 17   | 18   | 16   | 12   | 16   | 16   | 11   | 8    |
| NM_004049.2    | BCL2A1              | 35   | 50   | 35   | 37   | 35   | 28   | 13   | 16   | 10   | 9    | 8    | 11   | 11   | 11   | 11   | 20   | 12   | 20   |
| NM_001911.2    | CTSG                | 107  | 103  | 108  | 6    | 5    | 7    | 671  | 707  | 634  | 156  | 144  | 163  | 534  | 434  | 617  | 2104 | 2089 | 2080 |
| NM_001557.2    | IL8RB               | 6    | 7    | 3    | 4    | 6    | 4    | 1    | 5    | 5    | 5    | 5    | 2    | 2    | 0    | 2    | 1    | 4    | 8    |
| NM_001066.2    | TNFRSF1B            | 11   | 18   | 11   | 20   | 12   | 13   | 14   | 11   | 7    | 5    | 4    | 6    | 6    | 8    | 4    | 5    | 6    | 6    |
| NM_002046.3    | GAPDH               | 2778 | 3455 | 3297 | 2787 | 2900 | 1919 | 4007 | 4085 | 3661 | 3195 | 2812 | 2996 | 4026 | 3047 | 4763 | 5197 | 5040 | 5239 |
| NM_006169.2    | NNMT                | 2    | 1    | 1    | 0    | 1    | 1    | 10   | 5    | 4    | 13   | 19   | 15   | 5    | 5    | 5    | 13   | 15   | 9    |
| NM_015381.3    | FAM19A5             | 0    | 1    | 0    | 1    | 0    | 1    | 2    | 3    | 2    | 12   | 7    | 11   | 2    | 5    | 5    | 17   | 17   | 17   |
| NM_015136.2    | STAB1               | 47   | 83   | 70   | 11   | 12   | 7    | 529  | 611  | 518  | 245  | 195  | 255  | 546  | 510  | 721  | 667  | 681  | 697  |
| NM_002029.3    | FPR1                | 2    | 3    | 4    | 11   | 4    | 5    | 3    | 9    | 4    | 2    | 4    | 2    | 6    | 4    | 7    | 14   | 8    | 3    |
| NM_003930.3    | SCAP2               | 16   | 25   | 24   | 12   | 16   | 7    | 1    | 3    | 1    | 3    | 3    | 7    | 1    | 0    | 2    | 3    | 3    | 5    |
| NM_006486.2    | FBLN1               | 1    | 3    | 0    | 0    | 0    | 0    | 0    | 0    | 2    | 10   | 6    | 6    | 0    | 2    | 1    | 4    | 6    | 10   |
| NM_153206.1    | AMICA1              | 0    | 0    | 1    | 0    | 0    | 1    | 0    | 0    | 0    | 2    | 0    | 0    | 2    | 0    | 0    | 1    | 1    | 0    |
| NM_002965.2    | S100A9              | 57   | 53   | 39   | 243  | 238  | 165  | 44   | 63   | 54   | 30   | 20   | 23   | 28   | 28   | 48   | 96   | 84   | 107  |
| NM_021209.3    | CARD12/NLRC4        | 2    | 3    | 3    | 4    | 3    | 4    | 1    | 3    | 2    | 5    | 3    | 2    | 0    | 1    | 2    | 2    | 1    | 3    |
| NM_000433.2    | NCF2                | 19   | 22   | 32   | 31   | 32   | 21   | 29   | 27   | 29   | 21   | 26   | 19   | 28   | 20   | 43   | 38   | 27   | 37   |
| NM_003489.2    | NRIP1               | 73   | 79   | 63   | 19   | 26   | 15   | 4    | 3    | 4    | 3    | 1    | 2    | 2    | 3    | 1    | 4    | 6    | 4    |
| NM_001040084.1 | LOC653107/ANXA8     | 1    | 3    | 0    | 1    | 4    | 0    | 60   | 55   | 72   | 33   | 39   | 62   | 243  | 201  | 301  | 45   | 37   | 41   |
| NM_016582.1    | SLC15A3             | 2    | 2    | 1    | 1    | 2    | 2    | 1    | 5    | 2    | 1    | 3    | 3    | 1    | 1    | 2    | 8    | 2    | 1    |
| NM_000211.2    | ITGB2               | 106  | 141  | 126  | 51   | 55   | 37   | 215  | 223  | 175  | 32   | 28   | 28   | 21   | 13   | 21   | 33   | 33   | 41   |
| NM_000601.4    | HGF                 | 27   | 24   | 19   | 37   | 40   | 21   | 621  | 778  | 666  | 612  | 606  | 574  | 962  | 719  | 1118 | 940  | 931  | 887  |
| NM_001042729.1 | FGR                 | 39   | 35   | 35   | 17   | 12   | 14   | 67   | 54   | 48   | 12   | 7    | 5    | 7    | 4    | 5    | 5    | 9    | 6    |
| NM_001614.2    | ACTG1               | 1849 | 2445 | 2162 | 2086 | 2190 | 1507 | 3295 | 3953 | 3430 | 1900 | 1984 | 1935 | 2937 | 2469 | 3799 | 4984 | 4897 | 4826 |
| NM_138444.2    | KCTD12              | 3    | 10   | 4    | 2    | 1    | 4    | 5    | 3    | 4    | 2    | 1    | 2    | 5    | 0    | 1    | 5    | 5    | 4    |
| NM_002964.3    | S100A8              | 100  | 111  | 99   | 662  | 662  | 416  | 119  | 203  | 128  | 31   | 47   | 44   | 89   | 84   | 101  | 149  | 138  | 147  |
| NM_001025109.1 | CD34                | 157  | 167  | 205  | 288  | 274  | 202  | 3    | 5    | 4    | 2    | 0    | 2    | 0    | 3    | 3    | 12   | 10   | 10   |
| NM_000474.3    | TWIST1              | 0    | 1    | 1    | 9    | 6    | 4    | 11   | 7    | 13   | 7    | 10   | 11   | 17   | 15   | 24   | 44   | 45   | 41   |
| NM_015869.3    | PPARG               | 2    | 0    | 2    | 1    | 2    | 2    | 17   | 16   | 12   | 24   | 30   | 30   | 33   | 20   | 32   | 28   | 27   | 23   |
| NM_004666.1    | VNN1                | 15   | 29   | 19   | 1    | 2    | 4    | 1    | 3    | 0    | 1    | 1    | 1    | 3    | 0    | 0    | 3    | 1    | 1    |
| NM_005874.1    | LILRB2              | 17   | 29   | 24   | 19   | 22   | 12   | 21   | 26   | 17   | 10   | 11   | 10   | 13   | 6    | 9    | 18   | 23   | 15   |
| NM_001005463.1 | EBF3                | 3    | 2    | 2    | 5    | 0    | 2    | 15   | 14   | 13   | 8    | 6    | 7    | 11   | 12   | 6    | 8    | 23   | 14   |
| NM_152852.1    | MS4A6A              | 6    | 3    | 3    | 2    | 3    | 2    | 1    | 1    | 2    | 0    | 5    | 3    | 4    | 2    | 1    | 2    | 2    | 0    |

**Supplemental Table 2.** Data from nCounter assays of AML samples and normal CD34+, promyelocytes, and neutrophils (PMNs).

| Accession No. | Gene Name/Sample ID | M2   | M2   | M2   | M2   | M2   | M2   | M3   |
|---------------|---------------------|------|------|------|------|------|------|------|------|------|------|------|------|------|------|------|------|------|------|
|               |                     | 6744 | 6744 | 6744 | 6746 | 6746 | 6746 | 3038 | 3038 | 3038 | 4537 | 4537 | 4537 | 6947 | 6947 | 6947 | 9062 | 9062 | 9062 |
| NM_000954.5   | PTGDS               | 0    | 0    | 0    | 1    | 0    | 0    | 114  | 119  | 116  | 12   | 11   | 13   | 70   | 42   | 78   | 66   | 39   | 45   |
| NM_000222.1   | KIT                 | 43   | 59   | 60   | 70   | 76   | 49   | 28   | 38   | 39   | 28   | 24   | 29   | 49   | 30   | 45   | 43   | 39   | 43   |
| NM_004961.3   | GABRE               | 1    | 1    | 1    | 0    | 3    | 1    | 21   | 31   | 17   | 2    | 7    | 3    | 24   | 28   | 26   | 11   | 8    | 8    |
| NM_007261.2   | CD300A              | 5    | 5    | 6    | 4    | 2    | 0    | 4    | 3    | 5    | 3    | 4    | 2    | 3    | 4    | 3    | 9    | 10   | 19   |
| NM_002115.1   | HK3                 | 0    | 3    | 1    | 4    | 5    | 1    | 4    | 8    | 6    | 2    | 2    | 5    | 1    | 7    | 4    | 5    | 5    | 8    |
| NM_023914.2   | P2RY13              | 5    | 3    | 6    | 31   | 25   | 21   | 4    | 4    | 6    | 2    | 6    | 3    | 5    | 6    | 3    | 7    | 7    | 8    |
| NM_033642.1   | FGF13               | 0    | 2    | 2    | 1    | 3    | 5    | 22   | 15   | 11   | 9    | 16   | 9    | 29   | 20   | 25   | 25   | 24   | 20   |

|            |                 |      |      |      |      |      |      |      |      |      |      |      |      |      |      |      |      |      |      |
|------------|-----------------|------|------|------|------|------|------|------|------|------|------|------|------|------|------|------|------|------|------|
| AF324996.2 | Athal_Spike_S23 | 1800 | 1810 | 1818 | 1792 | 1814 | 1808 | 1784 | 1759 | 1759 | 1820 | 1806 | 1800 | 1861 | 1772 | 1760 | 1810 | 1851 | 1792 |
| AF325027.2 | Athal_Spike_S14 | 760  | 783  | 776  | 794  | 754  | 757  | 782  | 812  | 803  | 729  | 753  | 782  | 741  | 803  | 801  | 757  | 744  | 748  |
| AF325042.2 | Athal_Spike_S19 | 530  | 516  | 504  | 512  | 507  | 524  | 512  | 484  | 490  | 533  | 517  | 512  | 502  | 547  | 507  | 525  | 481  | 486  |
| AY058560.1 | DrosSpike8      | 201  | 175  | 194  | 171  | 189  | 179  | 166  | 195  | 211  | 181  | 165  | 174  | 167  | 177  | 208  | 174  | 179  | 194  |
| AF325027.2 | Athal_Spike_S13 | 70   | 66   | 63   | 79   | 77   | 65   | 64   | 80   | 65   | 87   | 85   | 75   | 85   | 69   | 76   | 66   | 87   | 86   |
| AF324998.2 | Athal_Spike_S22 | 70   | 90   | 86   | 98   | 84   | 87   | 112  | 112  | 96   | 92   | 93   | 80   | 90   | 79   | 83   | 90   | 96   | 110  |
| AY058658.1 | DrosSpike7      | 28   | 26   | 23   | 22   | 31   | 39   | 34   | 30   | 32   | 25   | 32   | 27   | 21   | 24   | 29   | 37   | 26   | 36   |
| AF325032.2 | Athal_Spike_S17 | 29   | 26   | 23   | 21   | 32   | 32   | 38   | 24   | 29   | 22   | 35   | 33   | 23   | 16   | 27   | 29   | 28   | 33   |
| DQ412624   | SarsSpike3      | 7    | 4    | 7    | 9    | 9    | 4    | 3    | 1    | 10   | 6    | 9    | 11   | 5    | 9    | 7    | 8    | 3    | 10   |
| AY058658.1 | DrosSpike6      | 4    | 3    | 3    | 2    | 4    | 3    | 2    | 3    | 3    | 4    | 4    | 6    | 4    | 4    | 1    | 2    | 6    | 4    |
| AY058560.1 | DrosSpike10     | 1    | 0    | 2    | 1    | 1    | 1    | 0    | 1    | 6    | 1    | 0    | 2    | 2    | 2    | 1    | 1    | 1    | 1    |
| AY058658.1 | DrosSpike11     | 1    | 0    | 2    | 1    | 1    | 3    | 3    | 1    | 2    | 2    | 2    | 4    | 4    | 4    | 0    | 0    | 3    | 1    |
| AF325014.2 | Athal_Spike_S12 | 3    | 3    | 3    | 6    | 4    | 3    | 2    | 1    | 6    | 1    | 7    | 2    | 4    | 4    | 5    | 5    | 4    | 4    |
| AF325016.2 | Athal_Spike_S15 | 4    | 3    | 8    | 2    | 5    | 4    | 8    | 5    | 9    | 2    | 4    | 5    | 9    | 2    | 5    | 8    | 4    | 0    |
| AF325016.2 | Athal_Spike_S16 | 3    | 3    | 2    | 2    | 2    | 4    | 4    | 4    | 2    | 7    | 4    | 3    | 4    | 2    | 3    | 7    | 3    | 3    |
| AF325032.2 | Athal_Spike_S18 | 5    | 0    | 1    | 3    | 1    | 4    | 0    | 3    | 3    | 3    | 2    | 2    | 2    | 2    | 2    | 6    | 2    | 8    |
| AF324998.2 | Athal_Spike_S20 | 4    | 4    | 6    | 4    | 5    | 3    | 7    | 4    | 2    | 3    | 4    | 2    | 0    | 4    | 2    | 2    | 5    | 6    |
| AF324998.2 | Athal_Spike_S21 | 4    | 1    | 0    | 5    | 4    | 2    | 2    | 3    | 8    | 2    | 6    | 5    | 3    | 3    | 6    | 6    | 7    | 4    |
| AF324998.2 | Athal_Spike_S24 | 3    | 1    | 2    | 3    | 4    | 1    | 5    | 3    | 7    | 6    | 2    | 2    | 7    | 3    | 3    | 3    | 3    | 4    |
| DQ412624   | SarsSpike4      | 2    | 3    | 2    | 5    | 4    | 6    | 5    | 4    | 6    | 2    | 4    | 7    | 13   | 5    | 7    | 4    | 0    | 5    |
| AY058560.1 | DrosSpike9      | 2    | 2    | 1    | 1    | 1    | 1    | 1    | 0    | 3    | 2    | 0    | 0    | 2    | 2    | 0    | 2    | 2    | 1    |

**Supplemental Table 2.** Data from nCounter assays of AML samples and normal CD34+, promyelocytes, and neutrophils (PMNs).

| Accession No.  | Gene Name/Sample ID | M3    |
|----------------|---------------------|-------|-------|-------|-------|-------|-------|-------|-------|-------|-------|-------|-------|-------|-------|-------|
|                |                     | 15590 | 15590 | 15590 | 15591 | 15591 | 15591 | 15605 | 15605 | 15605 | 16060 | 16060 | 16060 | 17932 | 17932 | 17932 |
| NM_002841.2    | PTPRG               | 5     | 5     | 3     | 9     | 15    | 10    | 29    | 16    | 28    | 12    | 12    | 12    | 15    | 16    | 13    |
| NM_145256.2    | LRRC25              | 1     | 2     | 1     | 1     | 2     | 0     | 3     | 1     | 1     | 1     | 0     | 2     | 4     | 3     | 3     |
| NM_001972.2    | ELA2                | 388   | 408   | 352   | 183   | 192   | 186   | 213   | 215   | 319   | 219   | 164   | 124   | 175   | 131   | 174   |
| NM_000597.2    | IGFBP2              | 269   | 302   | 261   | 268   | 264   | 255   | 369   | 376   | 550   | 327   | 329   | 294   | 327   | 342   | 285   |
| NM_005413.1    | SIX3                | 34    | 22    | 18    | 15    | 14    | 13    | 78    | 71    | 133   | 46    | 37    | 32    | 30    | 29    | 18    |
| NM_006272.1    | S100B               | 108   | 113   | 122   | 44    | 36    | 39    | 86    | 86    | 116   | 92    | 101   | 93    | 66    | 87    | 78    |
| NM_003327.2    | TNFRSF4             | 16    | 18    | 23    | 11    | 6     | 3     | 73    | 50    | 87    | 29    | 32    | 49    | 7     | 4     | 6     |
| NM_004049.2    | BCL2A1              | 13    | 23    | 10    | 7     | 7     | 16    | 22    | 16    | 23    | 28    | 18    | 18    | 11    | 21    | 21    |
| NM_001911.2    | CTSG                | 829   | 976   | 939   | 610   | 646   | 613   | 1207  | 1252  | 1899  | 1650  | 1378  | 1236  | 448   | 447   | 370   |
| NM_001557.2    | IL8RB               | 5     | 3     | 4     | 2     | 1     | 2     | 6     | 4     | 7     | 2     | 4     | 6     | 1     | 1     | 3     |
| NM_001066.2    | TNFRSF1B            | 3     | 6     | 0     | 5     | 3     | 2     | 11    | 3     | 9     | 3     | 2     | 0     | 27    | 24    | 19    |
| NM_002046.3    | GAPDH               | 5816  | 6194  | 5803  | 2568  | 2787  | 2293  | 5517  | 5467  | 8500  | 6921  | 6006  | 5285  | 7955  | 8067  | 6548  |
| NM_006169.2    | NNMT                | 12    | 23    | 24    | 5     | 4     | 2     | 9     | 19    | 15    | 51    | 51    | 49    | 11    | 18    | 15    |
| NM_015381.3    | FAM19A5             | 17    | 23    | 21    | 21    | 20    | 15    | 29    | 42    | 65    | 7     | 8     | 10    | 48    | 54    | 43    |
| NM_015136.2    | STAB1               | 550   | 530   | 569   | 796   | 891   | 693   | 998   | 842   | 1295  | 886   | 879   | 832   | 977   | 933   | 766   |
| NM_002029.3    | FPR1                | 5     | 6     | 4     | 4     | 4     | 3     | 9     | 8     | 6     | 19    | 15    | 10    | 11    | 10    | 7     |
| NM_003930.3    | SCAP2               | 0     | 4     | 2     | 2     | 4     | 1     | 9     | 9     | 20    | 0     | 0     | 0     | 0     | 9     | 1     |
| NM_006486.2    | FBLN1               | 1     | 4     | 1     | 2     | 1     | 3     | 3     | 6     | 4     | 8     | 1     | 4     | 0     | 1     | 0     |
| NM_153206.1    | AMICA1              | 0     | 2     | 0     | 0     | 0     | 0     | 0     | 1     | 1     | 3     | 2     | 0     | 0     | 1     | 0     |
| NM_002965.2    | S100A9              | 16    | 25    | 20    | 9     | 4     | 10    | 5     | 5     | 4     | 46    | 55    | 35    | 194   | 219   | 179   |
| NM_021209.3    | CARD12/NLRC4        | 3     | 4     | 4     | 2     | 0     | 2     | 0     | 3     | 5     | 3     | 1     | 0     | 6     | 7     | 9     |
| NM_000433.2    | NCF2                | 26    | 22    | 23    | 18    | 26    | 14    | 31    | 17    | 20    | 31    | 18    | 12    | 82    | 84    | 65    |
| NM_003489.2    | NRIP1               | 16    | 6     | 8     | 3     | 3     | 2     | 6     | 7     | 14    | 8     | 9     | 2     | 10    | 3     | 9     |
| NM_001040084.1 | LOC653107/ANXA8     | 81    | 103   | 80    | 98    | 99    | 73    | 56    | 83    | 114   | 195   | 189   | 209   | 18    | 24    | 21    |
| NM_016582.1    | SLC15A3             | 1     | 5     | 4     | 2     | 2     | 1     | 1     | 2     | 6     | 2     | 1     | 6     | 7     | 6     | 9     |
| NM_000211.2    | ITGB2               | 16    | 21    | 23    | 11    | 7     | 22    | 29    | 27    | 54    | 13    | 15    | 6     | 84    | 90    | 72    |
| NM_000601.4    | HGF                 | 828   | 884   | 785   | 527   | 522   | 470   | 1096  | 1000  | 1504  | 2554  | 2173  | 2297  | 896   | 873   | 723   |
| NM_001042729.1 | FGR                 | 6     | 3     | 5     | 6     | 3     | 8     | 4     | 7     | 13    | 6     | 7     | 0     | 55    | 41    | 58    |
| NM_001614.2    | ACTG1               | 4636  | 4778  | 4599  | 2180  | 2432  | 2034  | 5431  | 4789  | 6845  | 3736  | 3420  | 3430  | 6033  | 5898  | 4910  |
| NM_138444.2    | KCTD12              | 5     | 2     | 6     | 2     | 0     | 1     | 5     | 3     | 4     | 1     | 5     | 8     | 11    | 4     | 15    |
| NM_002964.3    | S100A8              | 32    | 34    | 34    | 14    | 15    | 13    | 18    | 7     | 19    | 74    | 65    | 83    | 483   | 435   | 419   |
| NM_001025109.1 | CD34                | 3     | 5     | 4     | 2     | 2     | 2     | 5     | 7     | 9     | 0     | 2     | 4     | 4     | 1     | 3     |
| NM_000474.3    | TWIST1              | 48    | 47    | 37    | 15    | 13    | 14    | 11    | 24    | 27    | 18    | 18    | 20    | 46    | 31    | 38    |
| NM_015869.3    | PPARG               | 53    | 48    | 41    | 19    | 15    | 13    | 26    | 23    | 24    | 33    | 21    | 41    | 58    | 38    | 30    |
| NM_004666.1    | VNN1                | 3     | 2     | 4     | 2     | 1     | 1     | 4     | 3     | 6     | 3     | 4     | 2     | 1     | 6     | 3     |
| NM_005874.1    | LILRB2              | 5     | 12    | 14    | 5     | 6     | 2     | 5     | 9     | 16    | 10    | 16    | 10    | 39    | 25    | 25    |
| NM_001005463.1 | EBF3                | 61    | 65    | 55    | 20    | 29    | 16    | 11    | 21    | 29    | 70    | 69    | 49    | 92    | 103   | 69    |
| NM_152852.1    | MS4A6A              | 3     | 6     | 4     | 0     | 3     | 1     | 1     | 1     | 3     | 3     | 3     | 2     | 3     | 1     | 1     |

**Supplemental Table 2.** Data from nCounter assays of AML samples and normal CD34+, promyelocytes, and neutrophils (PMNs).

| Accession No. | Gene Name/Sample ID | M3    |
|---------------|---------------------|-------|-------|-------|-------|-------|-------|-------|-------|-------|-------|-------|-------|-------|-------|-------|
|               |                     | 15590 | 15590 | 15590 | 15591 | 15591 | 15591 | 15605 | 15605 | 15605 | 16060 | 16060 | 16060 | 16060 | 17932 | 17932 |
| NM_000954.5   | PTGDS               | 32    | 29    | 21    | 49    | 50    | 59    | 36    | 36    | 66    | 17    | 16    | 10    | 7     | 13    | 7     |
| NM_000222.1   | KIT                 | 68    | 81    | 72    | 37    | 46    | 35    | 57    | 66    | 69    | 46    | 21    | 32    | 86    | 84    | 59    |
| NM_004961.3   | GABRE               | 5     | 6     | 15    | 5     | 13    | 7     | 29    | 22    | 23    | 27    | 25    | 20    | 24    | 25    | 19    |
| NM_007261.2   | CD300A              | 1     | 6     | 8     | 4     | 6     | 5     | 9     | 4     | 9     | 3     | 7     | 10    | 15    | 10    | 3     |
| NM_002115.1   | HK3                 | 3     | 10    | 9     | 2     | 3     | 3     | 4     | 6     | 4     | 6     | 4     | 4     | 4     | 0     | 7     |
| NM_023914.2   | P2RY13              | 12    | 9     | 10    | 2     | 5     | 0     | 6     | 6     | 9     | 6     | 4     | 6     | 13    | 10    | 12    |
| NM_033642.1   | FGF13               | 26    | 32    | 28    | 12    | 13    | 18    | 24    | 12    | 23    | 25    | 20    | 16    | 34    | 22    | 19    |

|            |                 |      |      |      |      |      |      |      |      |      |      |      |      |      |      |      |
|------------|-----------------|------|------|------|------|------|------|------|------|------|------|------|------|------|------|------|
| AF324996.2 | Athal_Spike_S23 | 1816 | 1849 | 1821 | 1795 | 1877 | 1782 | 1808 | 1839 | 1795 | 1865 | 1797 | 1835 | 1801 | 1849 | 1889 |
| AF325027.2 | Athal_Spike_S14 | 754  | 755  | 802  | 799  | 758  | 757  | 796  | 789  | 787  | 754  | 760  | 806  | 750  | 709  | 741  |
| AF325042.2 | Athal_Spike_S19 | 542  | 501  | 491  | 519  | 475  | 542  | 505  | 464  | 518  | 478  | 532  | 447  | 504  | 499  | 491  |
| AY058560.1 | DrosSpike8      | 162  | 170  | 154  | 154  | 185  | 186  | 152  | 164  | 184  | 161  | 191  | 203  | 197  | 194  | 167  |
| AF325027.2 | Athal_Spike_S13 | 69   | 62   | 72   | 78   | 76   | 75   | 70   | 88   | 82   | 97   | 68   | 55   | 66   | 79   | 65   |
| AF324998.2 | Athal_Spike_S22 | 94   | 90   | 99   | 90   | 69   | 83   | 89   | 90   | 61   | 85   | 85   | 87   | 103  | 97   | 100  |
| AY058658.1 | DrosSpike7      | 27   | 30   | 23   | 28   | 28   | 37   | 28   | 30   | 27   | 28   | 24   | 37   | 34   | 25   | 16   |
| AF325032.2 | Athal_Spike_S17 | 27   | 31   | 25   | 25   | 25   | 25   | 29   | 26   | 27   | 21   | 30   | 12   | 34   | 31   | 24   |
| DQ412624   | SarsSpike3      | 4    | 6    | 11   | 9    | 4    | 8    | 15   | 3    | 10   | 9    | 12   | 12   | 4    | 12   | 4    |
| AY058658.1 | DrosSpike6      | 4    | 4    | 3    | 2    | 2    | 3    | 6    | 5    | 7    | 1    | 0    | 6    | 6    | 3    | 1    |
| AY058560.1 | DrosSpike10     | 1    | 4    | 0    | 2    | 0    | 3    | 4    | 0    | 2    | 2    | 3    | 2    | 0    | 1    | 1    |
| AY058658.1 | DrosSpike11     | 3    | 0    | 1    | 1    | 0    | 2    | 1    | 1    | 3    | 2    | 2    | 2    | 0    | 1    | 4    |
| AF325014.2 | Athal_Spike_S12 | 5    | 2    | 8    | 4    | 1    | 0    | 4    | 3    | 7    | 4    | 4    | 6    | 1    | 3    | 4    |
| AF325016.2 | Athal_Spike_S15 | 8    | 9    | 7    | 4    | 6    | 5    | 13   | 4    | 3    | 2    | 5    | 8    | 4    | 6    | 3    |
| AF325016.2 | Athal_Spike_S16 | 3    | 0    | 1    | 0    | 3    | 0    | 4    | 2    | 4    | 0    | 10   | 2    | 6    | 1    | 4    |
| AF325032.2 | Athal_Spike_S18 | 3    | 4    | 5    | 2    | 3    | 1    | 0    | 3    | 4    | 3    | 2    | 10   | 4    | 4    | 6    |
| AF324998.2 | Athal_Spike_S20 | 12   | 5    | 7    | 2    | 3    | 7    | 4    | 1    | 2    | 0    | 2    | 2    | 6    | 0    | 1    |
| AF324998.2 | Athal_Spike_S21 | 10   | 3    | 5    | 4    | 6    | 1    | 3    | 5    | 4    | 4    | 5    | 2    | 0    | 6    | 3    |
| AF324998.2 | Athal_Spike_S24 | 0    | 3    | 4    | 4    | 4    | 2    | 4    | 2    | 4    | 3    | 5    | 0    | 3    | 1    | 1    |
| DQ412624   | SarsSpike4      | 1    | 2    | 7    | 5    | 4    | 8    | 14   | 5    | 5    | 3    | 5    | 4    | 3    | 6    | 6    |
| AY058560.1 | DrosSpike9      | 1    | 0    | 1    | 0    | 1    | 1    | 0    | 1    | 2    | 1    | 1    | 0    | 0    | 1    | 0    |

**Supplemental Table 2.** Data from nCounter assays of AML samples and normal CD34+, promyelocytes, and neutrophils (PMNs).

| Accession No.  | Gene Name/Sample ID | M3    | M3    | M3    | M3    | M3    | M3    | M4   | M4   | M4   | M4    | M4    | M4    | M4    | M4    | M4    |
|----------------|---------------------|-------|-------|-------|-------|-------|-------|------|------|------|-------|-------|-------|-------|-------|-------|
|                |                     | 20898 | 20898 | 20898 | 20899 | 20899 | 20899 | 6039 | 6039 | 6039 | 15601 | 15601 | 15601 | 15602 | 15602 | 15602 |
| NM_002841.2    | PTPRG               | 12    | 12    | 7     | 27    | 19    | 19    | 1    | 2    | 2    | 0     | 1     | 4     | 2     | 2     | 2     |
| NM_145256.2    | LRRC25              | 4     | 1     | 2     | 2     | 2     | 5     | 34   | 19   | 22   | 28    | 24    | 20    | 94    | 118   | 104   |
| NM_001972.2    | ELA2                | 816   | 760   | 761   | 380   | 423   | 365   | 39   | 32   | 33   | 78    | 78    | 68    | 7     | 9     | 15    |
| NM_000597.2    | IGFBP2              | 280   | 236   | 223   | 1167  | 1011  | 1171  | 12   | 13   | 9    | 57    | 55    | 48    | 33    | 28    | 30    |
| NM_005413.1    | SIX3                | 76    | 70    | 73    | 70    | 67    | 65    | 0    | 4    | 9    | 6     | 5     | 1     | 3     | 5     | 3     |
| NM_006272.1    | S100B               | 179   | 189   | 149   | 362   | 356   | 406   | 2    | 0    | 1    | 8     | 16    | 11    | 6     | 9     | 8     |
| NM_003327.2    | TNFRSF4             | 39    | 26    | 28    | 79    | 79    | 87    | 0    | 4    | 0    | 4     | 0     | 1     | 7     | 2     | 4     |
| NM_004049.2    | BCL2A1              | 17    | 19    | 20    | 23    | 8     | 23    | 28   | 25   | 19   | 47    | 46    | 35    | 180   | 199   | 180   |
| NM_001911.2    | CTSG                | 3320  | 3186  | 2917  | 714   | 790   | 754   | 6    | 10   | 8    | 9     | 14    | 12    | 155   | 183   | 164   |
| NM_001557.2    | IL8RB               | 8     | 3     | 3     | 2     | 2     | 4     | 2    | 4    | 4    | 6     | 5     | 4     | 8     | 12    | 17    |
| NM_001066.2    | TNFRSF1B            | 7     | 16    | 5     | 14    | 14    | 23    | 153  | 142  | 143  | 126   | 106   | 92    | 440   | 460   | 432   |
| NM_002046.3    | GAPDH               | 7659  | 6995  | 6260  | 7903  | 7728  | 8005  | 3409 | 3494 | 3539 | 4175  | 4256  | 3942  | 4328  | 4325  | 4464  |
| NM_006169.2    | NNMT                | 138   | 95    | 102   | 42    | 59    | 53    | 4    | 4    | 3    | 10    | 8     | 8     | 1     | 3     | 2     |
| NM_015381.3    | FAM19A5             | 9     | 6     | 6     | 14    | 14    | 15    | 1    | 3    | 1    | 0     | 3     | 4     | 1     | 4     | 2     |
| NM_015136.2    | STAB1               | 571   | 531   | 453   | 710   | 591   | 690   | 57   | 58   | 53   | 23    | 34    | 24    | 214   | 223   | 218   |
| NM_002029.3    | FPR1                | 6     | 6     | 2     | 10    | 5     | 7     | 28   | 40   | 32   | 27    | 35    | 20    | 64    | 81    | 57    |
| NM_003930.3    | SCAP2               | 2     | 2     | 1     | 0     | 3     | 5     | 19   | 25   | 13   | 24    | 21    | 12    | 30    | 34    | 42    |
| NM_006486.2    | FBLN1               | 19    | 13    | 7     | 2     | 2     | 4     | 0    | 4    | 1    | 0     | 0     | 0     | 2     | 1     | 1     |
| NM_153206.1    | AMICA1              | 0     | 0     | 0     | 1     | 0     | 1     | 1    | 1    | 3    | 1     | 1     | 0     | 2     | 0     | 3     |
| NM_002965.2    | S100A9              | 21    | 23    | 16    | 53    | 46    | 44    | 1589 | 1610 | 1490 | 2243  | 2078  | 1948  | 1550  | 1667  | 1472  |
| NM_021209.3    | CARD12/NLRC4        | 5     | 0     | 5     | 8     | 2     | 8     | 24   | 19   | 28   | 14    | 13    | 23    | 39    | 46    | 33    |
| NM_000433.2    | NCF2                | 37    | 37    | 40    | 88    | 79    | 101   | 179  | 185  | 173  | 114   | 115   | 110   | 317   | 324   | 344   |
| NM_003489.2    | NRIP1               | 1     | 0     | 5     | 2     | 3     | 1     | 18   | 31   | 23   | 34    | 21    | 18    | 34    | 41    | 38    |
| NM_001040084.1 | LOC653107/ANXA8     | 19    | 19    | 10    | 203   | 212   | 218   | 7    | 4    | 6    | 6     | 5     | 3     | 3     | 1     | 2     |
| NM_016582.1    | SLC15A3             | 1     | 6     | 2     | 6     | 5     | 4     | 11   | 24   | 25   | 13    | 17    | 14    | 31    | 36    | 36    |
| NM_000211.2    | ITGB2               | 28    | 13    | 19    | 45    | 63    | 35    | 362  | 360  | 329  | 259   | 233   | 269   | 754   | 706   | 775   |
| NM_000601.4    | HGF                 | 2321  | 2146  | 1725  | 3477  | 3564  | 3492  | 68   | 62   | 71   | 139   | 104   | 108   | 28    | 30    | 28    |
| NM_001042729.1 | FGR                 | 15    | 8     | 3     | 21    | 29    | 35    | 275  | 267  | 252  | 176   | 164   | 200   | 591   | 602   | 611   |
| NM_001614.2    | ACTG1               | 5367  | 4817  | 4064  | 7911  | 7974  | 7995  | 2761 | 2655 | 2513 | 3267  | 2964  | 2951  | 3764  | 3904  | 3747  |
| NM_138444.2    | KCTD12              | 4     | 5     | 7     | 4     | 6     | 12    | 58   | 64   | 67   | 84    | 72    | 60    | 74    | 73    | 70    |
| NM_002964.3    | S100A8              | 50    | 38    | 30    | 107   | 87    | 87    | 2883 | 2798 | 2649 | 4377  | 3984  | 3749  | 3220  | 3314  | 3276  |
| NM_001025109.1 | CD34                | 5     | 8     | 7     | 14    | 14    | 11    | 6    | 12   | 18   | 55    | 68    | 76    | 8     | 8     | 5     |
| NM_000474.3    | TWIST1              | 31    | 19    | 24    | 18    | 11    | 18    | 4    | 3    | 2    | 3     | 2     | 2     | 8     | 2     | 4     |
| NM_015869.3    | PPARG               | 14    | 15    | 8     | 17    | 5     | 15    | 2    | 2    | 3    | 6     | 5     | 6     | 4     | 6     | 7     |
| NM_004666.1    | VNN1                | 4     | 2     | 1     | 1     | 3     | 3     | 23   | 19   | 23   | 3     | 3     | 3     | 54    | 56    | 47    |
| NM_005874.1    | LILRB2              | 9     | 5     | 3     | 16    | 25    | 27    | 100  | 112  | 118  | 75    | 69    | 74    | 487   | 473   | 440   |
| NM_001005463.1 | EBF3                | 11    | 18    | 12    | 45    | 59    | 49    | 1    | 2    | 2    | 10    | 5     | 4     | 3     | 3     | 2     |
| NM_152852.1    | MS4A6A              | 2     | 7     | 2     | 5     | 0     | 5     | 33   | 33   | 23   | 26    | 23    | 21    | 28    | 28    | 41    |

**Supplemental Table 2.** Data from nCounter assays of AML samples and normal CD34+, promyelocytes, and neutrophils (PMNs).

| Accession No. | Gene Name/Sample ID | M3    | M3    | M3    | M3    | M3    | M3    | M4   | M4   | M4   | M4    | M4    | M4    | M4    | M4    |       |
|---------------|---------------------|-------|-------|-------|-------|-------|-------|------|------|------|-------|-------|-------|-------|-------|-------|
|               |                     | 20898 | 20898 | 20898 | 20899 | 20899 | 20899 | 6039 | 6039 | 6039 | 15601 | 15601 | 15601 | 15602 | 15602 | 15602 |
| NM_000954.5   | PTGDS               | 4     | 6     | 12    | 21    | 25    | 31    | 1    | 2    | 3    | 1     | 2     | 0     | 0     | 0     | 0     |
| NM_000222.1   | KIT                 | 88    | 84    | 86    | 17    | 17    | 19    | 12   | 10   | 17   | 59    | 65    | 56    | 23    | 30    | 24    |
| NM_004961.3   | GABRE               | 0     | 1     | 2     | 12    | 10    | 11    | 2    | 2    | 4    | 2     | 7     | 3     | 4     | 4     | 2     |
| NM_007261.2   | CD300A              | 13    | 7     | 5     | 7     | 11    | 3     | 0    | 4    | 2    | 12    | 4     | 8     | 17    | 14    | 9     |
| NM_002115.1   | HK3                 | 7     | 2     | 6     | 1     | 6     | 4     | 24   | 12   | 14   | 6     | 12    | 12    | 25    | 29    | 36    |
| NM_023914.2   | P2RY13              | 11    | 4     | 7     | 7     | 2     | 4     | 39   | 51   | 46   | 52    | 56    | 60    | 94    | 105   | 91    |
| NM_033642.1   | FGF13               | 37    | 40    | 27    | 28    | 32    | 18    | 2    | 2    | 1    | 2     | 0     | 3     | 2     | 1     | 1     |

|            |                 |      |      |      |      |      |      |      |      |      |      |      |      |      |      |      |
|------------|-----------------|------|------|------|------|------|------|------|------|------|------|------|------|------|------|------|
| AF324996.2 | Athal_Spike_S23 | 1863 | 1832 | 1850 | 1875 | 1833 | 1819 | 1801 | 1816 | 1872 | 1825 | 1866 | 1883 | 1858 | 1859 | 1909 |
| AF325027.2 | Athal_Spike_S14 | 754  | 699  | 745  | 737  | 768  | 768  | 811  | 734  | 689  | 761  | 766  | 676  | 730  | 744  | 713  |
| AF325042.2 | Athal_Spike_S19 | 489  | 514  | 515  | 472  | 464  | 516  | 483  | 540  | 527  | 521  | 506  | 516  | 501  | 501  | 497  |
| AY058560.1 | DrosSpike8      | 155  | 201  | 168  | 174  | 208  | 195  | 190  | 183  | 183  | 166  | 165  | 196  | 190  | 187  | 173  |
| AF325027.2 | Athal_Spike_S13 | 67   | 92   | 71   | 60   | 62   | 60   | 66   | 69   | 66   | 76   | 69   | 77   | 84   | 74   | 61   |
| AF324998.2 | Athal_Spike_S22 | 79   | 91   | 89   | 97   | 79   | 76   | 84   | 88   | 93   | 90   | 65   | 81   | 84   | 81   | 89   |
| AY058658.1 | DrosSpike7      | 32   | 29   | 31   | 25   | 25   | 29   | 32   | 22   | 26   | 23   | 28   | 31   | 21   | 23   | 21   |
| AF325032.2 | Athal_Spike_S17 | 38   | 24   | 17   | 37   | 51   | 30   | 26   | 36   | 36   | 23   | 29   | 29   | 23   | 25   | 27   |
| DQ412624   | SarsSpike3      | 18   | 11   | 9    | 18   | 5    | 4    | 6    | 6    | 5    | 10   | 4    | 6    | 5    | 4    | 5    |
| AY058658.1 | DrosSpike6      | 5    | 6    | 5    | 4    | 5    | 3    | 2    | 5    | 2    | 5    | 3    | 4    | 4    | 0    | 4    |
| AY058560.1 | DrosSpike10     | 2    | 3    | 1    | 2    | 2    | 0    | 5    | 1    | 3    | 3    | 1    | 2    | 2    | 1    | 0    |
| AY058658.1 | DrosSpike11     | 2    | 0    | 6    | 2    | 0    | 1    | 1    | 3    | 0    | 2    | 0    | 3    | 2    | 0    | 2    |
| AF325014.2 | Athal_Spike_S12 | 5    | 6    | 6    | 5    | 8    | 7    | 2    | 6    | 5    | 2    | 5    | 3    | 5    | 3    | 3    |
| AF325016.2 | Athal_Spike_S15 | 5    | 6    | 5    | 4    | 2    | 5    | 1    | 1    | 1    | 6    | 5    | 10   | 2    | 0    | 5    |
| AF325016.2 | Athal_Spike_S16 | 2    | 3    | 8    | 4    | 0    | 5    | 2    | 3    | 4    | 1    | 5    | 3    | 3    | 2    | 5    |
| AF325032.2 | Athal_Spike_S18 | 5    | 3    | 3    | 5    | 10   | 3    | 7    | 3    | 2    | 2    | 5    | 8    | 2    | 5    | 4    |
| AF324998.2 | Athal_Spike_S20 | 6    | 4    | 3    | 4    | 3    | 5    | 2    | 1    | 4    | 4    | 3    | 6    | 1    | 5    | 5    |
| AF324998.2 | Athal_Spike_S21 | 1    | 3    | 7    | 0    | 5    | 5    | 2    | 4    | 3    | 5    | 4    | 3    | 3    | 5    | 4    |
| AF324998.2 | Athal_Spike_S24 | 6    | 2    | 1    | 2    | 5    | 1    | 5    | 3    | 3    | 3    | 2    | 4    | 3    | 6    | 2    |
| DQ412624   | SarsSpike4      | 1    | 7    | 0    | 7    | 2    | 10   | 4    | 7    | 3    | 3    | 4    | 6    | 6    | 7    | 3    |
| AY058560.1 | DrosSpike9      | 0    | 1    | 0    | 4    | 2    | 3    | 0    | 2    | 0    | 4    | 1    | 1    | 0    | 1    | 2    |



**Supplemental Table 2.** Data from nCounter assays of AML samples and normal CD34+, promyelocytes, and neutrophils (PMNs).

| Accession No.  | Gene Name/Sample ID | M4    | M4    | M4    | CD34 | CD34 | CD34 | CD34 | CD34 | CD34 | Pros   | Pros   | Pros   | Pros   | Pros   |
|----------------|---------------------|-------|-------|-------|------|------|------|------|------|------|--------|--------|--------|--------|--------|
|                |                     | 20896 | 20896 | 20896 | 6    | 6    | 6    | 7    | 7    | 7    | 109055 | 109055 | 109055 | 109058 | 109058 |
| NM_002841.2    | PTPRG               | 1     | 1     | 0     | 1    | 1    | 1    | 0    | 0    | 7    | 8      | 13     | 9      | 10     | 9      |
| NM_145256.2    | LRRC25              | 14    | 8     | 18    | 1    | 1    | 2    | 3    | 3    | 0    | 17     | 15     | 10     | 28     | 25     |
| NM_001972.2    | ELA2                | 28    | 15    | 12    | 12   | 39   | 28   | 13   | 18   | 18   | 1199   | 1075   | 1244   | 868    | 789    |
| NM_000597.2    | IGFBP2              | 7     | 13    | 12    | 14   | 21   | 12   | 15   | 18   | 22   | 26     | 21     | 18     | 74     | 73     |
| NM_005413.1    | SIX3                | 1     | 0     | 2     | 1    | 0    | 3    | 4    | 1    | 0    | 57     | 44     | 55     | 55     | 63     |
| NM_006272.1    | S100B               | 25    | 19    | 15    | 3    | 5    | 3    | 0    | 0    | 4    | 10     | 10     | 11     | 4      | 0      |
| NM_003327.2    | TNFRSF4             | 1     | 0     | 1     | 2    | 0    | 0    | 0    | 1    | 0    | 3      | 5      | 2      | 2      | 2      |
| NM_004049.2    | BCL2A1              | 39    | 34    | 24    | 23   | 34   | 41   | 35   | 49   | 49   | 88     | 74     | 78     | 124    | 147    |
| NM_001911.2    | CTSG                | 222   | 220   | 205   | 100  | 90   | 97   | 48   | 43   | 60   | 2067   | 1769   | 1995   | 1946   | 1977   |
| NM_001557.2    | IL8RB               | 6     | 13    | 11    | 2    | 2    | 6    | 6    | 5    | 0    | 16     | 18     | 10     | 21     | 27     |
| NM_001066.2    | TNFRSF1B            | 90    | 58    | 78    | 17   | 16   | 12   | 9    | 11   | 9    | 44     | 44     | 37     | 63     | 86     |
| NM_002046.3    | GAPDH               | 5168  | 5296  | 5129  | 3824 | 4716 | 4995 | 3221 | 3288 | 3670 | 7616   | 6498   | 7234   | 6988   | 7429   |
| NM_006169.2    | NNMT                | 3     | 2     | 4     | 3    | 0    | 1    | 4    | 5    | 7    | 13     | 12     | 12     | 6      | 11     |
| NM_015381.3    | FAM19A5             | 1     | 1     | 0     | 15   | 12   | 19   | 3    | 4    | 0    | 9      | 7      | 6      | 7      | 14     |
| NM_015136.2    | STAB1               | 54    | 72    | 58    | 4    | 5    | 3    | 5    | 4    | 7    | 9      | 7      | 10     | 14     | 11     |
| NM_002029.3    | FPR1                | 21    | 28    | 21    | 8    | 9    | 7    | 6    | 4    | 4    | 22     | 27     | 9      | 27     | 25     |
| NM_003930.3    | SCAP2               | 20    | 26    | 18    | 17   | 12   | 13   | 14   | 5    | 4    | 32     | 18     | 15     | 41     | 16     |
| NM_006486.2    | FBLN1               | 0     | 1     | 0     | 2    | 0    | 1    | 1    | 0    | 0    | 1      | 2      | 2      | 2      | 2      |
| NM_153206.1    | AMICA1              | 0     | 0     | 3     | 1    | 1    | 1    | 1    | 0    | 0    | 12     | 1      | 5      | 10     | 2      |
| NM_002965.2    | S100A9              | 619   | 642   | 542   | 60   | 90   | 98   | 107  | 123  | 116  | 12420  | 11305  | 11278  | 13705  | 14343  |
| NM_021209.3    | CARD12/NLRC4        | 6     | 3     | 8     | 4    | 2    | 4    | 3    | 0    | 2    | 67     | 74     | 72     | 70     | 102    |
| NM_000433.2    | NCF2                | 120   | 151   | 154   | 14   | 12   | 33   | 18   | 34   | 24   | 271    | 260    | 227    | 334    | 358    |
| NM_003489.2    | NRIP1               | 22    | 28    | 19    | 130  | 146  | 149  | 70   | 86   | 109  | 40     | 27     | 32     | 35     | 48     |
| NM_001040084.1 | LOC653107/ANXA8     | 4     | 4     | 1     | 0    | 4    | 1    | 1    | 4    | 0    | 14     | 4      | 9      | 22     | 41     |
| NM_016582.1    | SLC15A3             | 7     | 8     | 4     | 4    | 6    | 0    | 5    | 4    | 2    | 28     | 18     | 21     | 33     | 23     |
| NM_000211.2    | ITGB2               | 283   | 247   | 216   | 67   | 72   | 83   | 39   | 32   | 44   | 554    | 450    | 499    | 658    | 655    |
| NM_000601.4    | HGF                 | 78    | 68    | 87    | 23   | 44   | 39   | 18   | 23   | 18   | 21     | 10     | 15     | 31     | 20     |
| NM_001042729.1 | FGR                 | 259   | 233   | 216   | 11   | 13   | 15   | 8    | 12   | 9    | 948    | 829    | 888    | 1172   | 1043   |
| NM_001614.2    | ACTG1               | 3575  | 3698  | 3542  | 3295 | 3986 | 4302 | 2823 | 3171 | 3121 | 4404   | 3904   | 3926   | 5081   | 5345   |
| NM_138444.2    | KCTD12              | 24    | 9     | 12    | 9    | 16   | 10   | 9    | 9    | 18   | 30     | 21     | 23     | 37     | 23     |
| NM_002964.3    | S100A8              | 1046  | 1055  | 967   | 169  | 195  | 228  | 301  | 339  | 371  | 39038  | 34512  | 34841  | 42709  | 46190  |
| NM_001025109.1 | CD34                | 39    | 23    | 29    | 112  | 118  | 149  | 54   | 61   | 62   | 4      | 4      | 7      | 1      | 2      |
| NM_000474.3    | TWIST1              | 4     | 1     | 3     | 4    | 5    | 10   | 1    | 4    | 4    | 22     | 14     | 16     | 22     | 9      |
| NM_015869.3    | PPARG               | 0     | 1     | 3     | 2    | 5    | 3    | 3    | 4    | 11   | 41     | 30     | 28     | 51     | 50     |
| NM_004666.1    | VNN1                | 17    | 18    | 15    | 3    | 2    | 3    | 3    | 5    | 0    | 14     | 17     | 16     | 12     | 9      |
| NM_005874.1    | LILRB2              | 39    | 54    | 48    | 35   | 34   | 33   | 42   | 31   | 42   | 177    | 162    | 155    | 189    | 177    |
| NM_001005463.1 | EBF3                | 6     | 4     | 4     | 2    | 8    | 3    | 3    | 3    | 7    | 12     | 7      | 10     | 11     | 11     |
| NM_152852.1    | MS4A6A              | 36    | 40    | 35    | 5    | 11   | 5    | 8    | 5    | 9    | 6      | 5      | 4      | 7      | 11     |

**Supplemental Table 2.** Data from nCounter assays of AML samples and normal CD34+, promyelocytes, and neutrophils (PMNs).

| Accession No. | Gene Name/Sample ID | M4    | M4    | M4    | CD34 | CD34 | CD34 | CD34 | CD34 | CD34 | Pros   | Pros   | Pros   | Pros   | Pros   |
|---------------|---------------------|-------|-------|-------|------|------|------|------|------|------|--------|--------|--------|--------|--------|
|               |                     | 20896 | 20896 | 20896 | 6    | 6    | 6    | 7    | 7    | 7    | 109055 | 109055 | 109055 | 109058 | 109058 |
| NM_000954.5   | PTGDS               | 0     | 0     | 1     | 0    | 0    | 1    | 0    | 3    | 0    | 2      | 1      | 0      | 2      | 0      |
| NM_000222.1   | KIT                 | 15    | 18    | 12    | 37   | 51   | 52   | 33   | 23   | 22   | 7      | 4      | 5      | 4      | 14     |
| NM_004961.3   | GABRE               | 0     | 2     | 4     | 1    | 4    | 3    | 0    | 0    | 2    | 12     | 23     | 17     | 25     | 18     |
| NM_007261.2   | CD300A              | 3     | 3     | 2     | 7    | 12   | 14   | 4    | 5    | 2    | 12     | 4      | 7      | 6      | 5      |
| NM_002115.1   | HK3                 | 8     | 3     | 2     | 0    | 0    | 1    | 1    | 4    | 2    | 40     | 42     | 37     | 51     | 70     |
| NM_023914.2   | P2RY13              | 37    | 37    | 35    | 9    | 21   | 12   | 10   | 8    | 13   | 157    | 125    | 161    | 190    | 224    |
| NM_033642.1   | FGF13               | 1     | 1     | 0     | 4    | 0    | 3    | 3    | 0    | 2    | 15     | 25     | 27     | 4      | 7      |

|            |                 |      |      |      |      |      |      |      |      |      |      |      |      |      |      |
|------------|-----------------|------|------|------|------|------|------|------|------|------|------|------|------|------|------|
| AF324996.2 | Athal_Spike_S23 | 1778 | 1871 | 1905 | 1838 | 1881 | 1839 | 1782 | 1827 | 1731 | 1797 | 1875 | 1830 | 1825 | 1907 |
| AF325027.2 | Athal_Spike_S14 | 757  | 722  | 717  | 741  | 704  | 736  | 732  | 759  | 755  | 669  | 659  | 703  | 753  | 621  |
| AF325042.2 | Athal_Spike_S19 | 595  | 503  | 496  | 491  | 550  | 521  | 517  | 483  | 544  | 580  | 538  | 525  | 530  | 510  |
| AY058560.1 | DrosSpike8      | 155  | 170  | 165  | 190  | 145  | 178  | 187  | 167  | 202  | 195  | 166  | 197  | 150  | 163  |
| AF325027.2 | Athal_Spike_S13 | 69   | 69   | 79   | 72   | 64   | 85   | 89   | 77   | 73   | 75   | 83   | 71   | 75   | 86   |
| AF324998.2 | Athal_Spike_S22 | 85   | 100  | 87   | 82   | 90   | 81   | 117  | 101  | 98   | 98   | 88   | 94   | 89   | 98   |
| AY058658.1 | DrosSpike7      | 20   | 26   | 25   | 46   | 29   | 20   | 33   | 36   | 42   | 41   | 35   | 38   | 32   | 34   |
| AF325032.2 | Athal_Spike_S17 | 30   | 22   | 13   | 25   | 26   | 25   | 36   | 34   | 47   | 26   | 38   | 28   | 25   | 68   |
| DQ412624   | SarsSpike3      | 9    | 11   | 9    | 8    | 7    | 10   | 5    | 9    | 4    | 12   | 8    | 6    | 12   | 7    |
| AY058658.1 | DrosSpike6      | 1    | 4    | 3    | 6    | 4    | 3    | 0    | 4    | 2    | 6    | 8    | 7    | 7    | 5    |
| AY058560.1 | DrosSpike10     | 4    | 1    | 1    | 0    | 0    | 0    | 3    | 1    | 2    | 3    | 4    | 4    | 4    | 2    |
| AY058658.1 | DrosSpike11     | 8    | 1    | 4    | 1    | 1    | 0    | 0    | 0    | 0    | 8    | 4    | 4    | 1    | 7    |
| AF325014.2 | Athal_Spike_S12 | 2    | 2    | 4    | 5    | 2    | 5    | 0    | 5    | 0    | 4    | 7    | 7    | 10   | 5    |
| AF325016.2 | Athal_Spike_S15 | 2    | 6    | 1    | 3    | 6    | 3    | 0    | 4    | 0    | 6    | 10   | 9    | 9    | 14   |
| AF325016.2 | Athal_Spike_S16 | 4    | 3    | 2    | 1    | 2    | 3    | 1    | 3    | 0    | 3    | 4    | 1    | 7    | 14   |
| AF325032.2 | Athal_Spike_S18 | 0    | 2    | 3    | 2    | 4    | 4    | 3    | 0    | 0    | 34   | 30   | 29   | 27   | 32   |
| AF324998.2 | Athal_Spike_S20 | 4    | 3    | 0    | 1    | 1    | 4    | 1    | 1    | 0    | 2    | 4    | 6    | 4    | 5    |
| AF324998.2 | Athal_Spike_S21 | 4    | 1    | 2    | 1    | 2    | 5    | 3    | 4    | 4    | 7    | 8    | 4    | 0    | 5    |
| AF324998.2 | Athal_Spike_S24 | 6    | 2    | 5    | 3    | 2    | 5    | 0    | 3    | 0    | 15   | 14   | 17   | 11   | 20   |
| DQ412624   | SarsSpike4      | 4    | 2    | 3    | 5    | 2    | 4    | 3    | 4    | 4    | 6    | 7    | 7    | 7    | 5    |
| AY058560.1 | DrosSpike9      | 1    | 1    | 1    | 2    | 0    | 0    | 0    | 0    | 2    | 5    | 1    | 4    | 5    | 0    |

**Supplemental Table 2.** Data from nCounter assays of AML samples and normal CD34+, promyelocytes, and neutrophils (PMNs).

| Accession No.  | Gene Name/Sample ID | Pros   | PMNs   | PMNs   |
|----------------|---------------------|--------|--------|--------|--------|--------|--------|--------|--------|--------|--------|--------|--------|
|                |                     | 109058 | 114099 | 114099 | 114099 | 114100 | 114100 | 114100 | 114101 | 114101 | 114101 | 114101 | 109057 |
| NM_002841.2    | PTPRG               | 17     | 8      | 5      | 8      | 8      | 2      | 10     | 9      | 13     | 9      | 12     | 12     |
| NM_145256.2    | LRRC25              | 28     | 6      | 11     | 5      | 9      | 2      | 7      | 13     | 15     | 13     | 249    | 266    |
| NM_001972.2    | ELA2                | 867    | 216    | 247    | 272    | 354    | 259    | 317    | 310    | 324    | 323    | 47     | 35     |
| NM_000597.2    | IGFBP2              | 55     | 7      | 11     | 9      | 27     | 4      | 21     | 13     | 15     | 15     | 12     | 16     |
| NM_005413.1    | SIX3                | 64     | 48     | 52     | 60     | 77     | 4      | 67     | 104    | 86     | 80     | 61     | 43     |
| NM_006272.1    | S100B               | 6      | 1      | 2      | 5      | 4      | 0      | 2      | 6      | 6      | 2      | 5      | 8      |
| NM_003327.2    | TNFRSF4             | 5      | 3      | 2      | 4      | 4      | 0      | 2      | 5      | 5      | 4      | 5      | 9      |
| NM_004049.2    | BCL2A1              | 125    | 44     | 56     | 65     | 74     | 50     | 74     | 135    | 122    | 121    | 3264   | 2915   |
| NM_001911.2    | CTSG                | 1973   | 431    | 433    | 445    | 556    | 167    | 553    | 729    | 703    | 668    | 73     | 65     |
| NM_001557.2    | IL8RB               | 32     | 21     | 20     | 23     | 22     | 0      | 15     | 31     | 36     | 28     | 2153   | 1982   |
| NM_001066.2    | TNFRSF1B            | 65     | 75     | 69     | 69     | 75     | 59     | 59     | 115    | 111    | 104    | 1273   | 1202   |
| NM_002046.3    | GAPDH               | 7887   | 2952   | 3264   | 3296   | 3723   | 1530   | 3410   | 5675   | 5553   | 5591   | 3016   | 2697   |
| NM_006169.2    | NNMT                | 11     | 15     | 14     | 11     | 14     | 2      | 10     | 15     | 17     | 17     | 16     | 7      |
| NM_015381.3    | FAM19A5             | 10     | 4      | 6      | 7      | 5      | 1      | 4      | 14     | 11     | 10     | 12     | 3      |
| NM_015136.2    | STAB1               | 14     | 4      | 8      | 8      | 6      | 1      | 7      | 12     | 10     | 10     | 16     | 7      |
| NM_002029.3    | FPR1                | 45     | 19     | 22     | 19     | 29     | 16     | 30     | 96     | 96     | 85     | 2864   | 2610   |
| NM_003930.3    | SCAP2               | 30     | 11     | 11     | 12     | 18     | 8      | 9      | 22     | 22     | 25     | 56     | 60     |
| NM_006486.2    | FBLN1               | 3      | 2      | 3      | 1      | 1      | 0      | 0      | 1      | 1      | 1      | 2      | 0      |
| NM_153206.1    | AMICA1              | 4      | 11     | 14     | 12     | 11     | 6      | 15     | 20     | 20     | 20     | 17     | 14     |
| NM_002965.2    | S100A9              | 14743  | 3636   | 4143   | 4066   | 4738   | 520    | 4224   | 6612   | 6592   | 6666   | 18402  | 16585  |
| NM_021209.3    | CARD12/NLRC4        | 75     | 82     | 91     | 85     | 79     | 31     | 74     | 113    | 118    | 100    | 21     | 43     |
| NM_000433.2    | NCF2                | 374    | 167    | 153    | 171    | 198    | 93     | 199    | 288    | 319    | 267    | 2950   | 2698   |
| NM_003489.2    | NRIP1               | 42     | 13     | 19     | 24     | 25     | 2      | 31     | 37     | 33     | 33     | 19     | 27     |
| NM_001040084.1 | LOC653107/ANXA8     | 31     | 9      | 7      | 7      | 18     | 4      | 19     | 14     | 18     | 15     | 12     | 15     |
| NM_016582.1    | SLC15A3             | 34     | 18     | 12     | 18     | 19     | 3      | 18     | 32     | 24     | 17     | 185    | 190    |
| NM_000211.2    | ITGB2               | 763    | 294    | 322    | 344    | 386    | 143    | 339    | 513    | 504    | 500    | 1534   | 1479   |
| NM_000601.4    | HGF                 | 30     | 10     | 11     | 8      | 13     | 4      | 11     | 20     | 11     | 15     | 16     | 18     |
| NM_001042729.1 | FGR                 | 1256   | 968    | 990    | 1036   | 1004   | 1322   | 1018   | 1616   | 1601   | 1554   | 2959   | 2560   |
| NM_001614.2    | ACTG1               | 5497   | 1856   | 2023   | 2143   | 2709   | 1644   | 2497   | 3200   | 3382   | 3364   | 4005   | 3317   |
| NM_138444.2    | KCTD12              | 42     | 13     | 13     | 12     | 13     | 2      | 21     | 26     | 20     | 17     | 42     | 81     |
| NM_002964.3    | S100A8              | 47216  | 16732  | 18504  | 18732  | 20596  | 5219   | 18606  | 28528  | 28884  | 28963  | 38217  | 33320  |
| NM_001025109.1 | CD34                | 5      | 10     | 11     | 13     | 16     | 14     | 10     | 13     | 13     | 10     | 7      | 7      |
| NM_000474.3    | TWIST1              | 17     | 12     | 24     | 17     | 15     | 5      | 20     | 27     | 29     | 26     | 17     | 18     |
| NM_015869.3    | PPARG               | 49     | 27     | 34     | 33     | 41     | 2      | 26     | 40     | 43     | 51     | 33     | 31     |
| NM_004666.1    | VNN1                | 13     | 11     | 9      | 8      | 11     | 1      | 9      | 31     | 35     | 30     | 44     | 39     |
| NM_005874.1    | LILRB2              | 183    | 45     | 62     | 63     | 105    | 19     | 78     | 135    | 136    | 132    | 720    | 717    |
| NM_001005463.1 | EBF3                | 9      | 12     | 19     | 16     | 16     | 12     | 15     | 31     | 22     | 23     | 2      | 9      |
| NM_152852.1    | MS4A6A              | 11     | 4      | 2      | 1      | 3      | 1      | 2      | 5      | 6      | 4      | 0      | 4      |

**Supplemental Table 2.** Data from nCounter assays of AML samples and normal CD34+, promyelocytes, and neutrophils (PMNs).

| Accession No. | Gene Name/Sample ID | Pros   | PMNs   | PMNs   |
|---------------|---------------------|--------|--------|--------|--------|--------|--------|--------|--------|--------|--------|--------|--------|
|               |                     | 109058 | 114099 | 114099 | 114099 | 114100 | 114100 | 114100 | 114101 | 114101 | 114101 | 114101 | 109057 |
| NM_000954.5   | PTGDS               | 3      | 2      | 1      | 1      | 1      | 1      | 0      | 2      | 2      | 1      | 2      | 1      |
| NM_000222.1   | KIT                 | 6      | 5      | 1      | 5      | 4      | 1      | 2      | 6      | 9      | 3      | 5      | 4      |
| NM_004961.3   | GABRE               | 18     | 17     | 17     | 22     | 16     | 2      | 17     | 22     | 26     | 24     | 23     | 16     |
| NM_007261.2   | CD300A              | 10     | 3      | 5      | 5      | 5      | 2      | 5      | 10     | 10     | 9      | 21     | 19     |
| NM_002115.1   | HK3                 | 57     | 22     | 28     | 27     | 23     | 3      | 22     | 34     | 40     | 36     | 44     | 43     |
| NM_023914.2   | P2RY13              | 189    | 159    | 167    | 176    | 156    | 60     | 147    | 262    | 233    | 241    | 887    | 726    |
| NM_033642.1   | FGF13               | 9      | 5      | 4      | 5      | 9      | 1      | 7      | 13     | 11     | 11     | 2      | 7      |

|            |                 |      |      |      |      |      |      |      |      |      |      |      |      |
|------------|-----------------|------|------|------|------|------|------|------|------|------|------|------|------|
| AF324996.2 | Athal_Spike_S23 | 1837 | 1794 | 1783 | 1850 | 1774 | 1961 | 1746 | 1837 | 1833 | 1798 | 1881 | 1817 |
| AF325027.2 | Athal_Spike_S14 | 674  | 377  | 411  | 407  | 424  | 327  | 388  | 381  | 400  | 396  | 657  | 688  |
| AF325042.2 | Athal_Spike_S19 | 555  | 620  | 658  | 644  | 637  | 547  | 671  | 634  | 648  | 639  | 528  | 535  |
| AY058560.1 | DrosSpike8      | 173  | 184  | 187  | 174  | 164  | 162  | 180  | 173  | 169  | 181  | 160  | 214  |
| AF325027.2 | Athal_Spike_S13 | 71   | 208  | 161  | 162  | 182  | 178  | 187  | 152  | 157  | 153  | 61   | 80   |
| AF324998.2 | Athal_Spike_S22 | 101  | 155  | 183  | 154  | 161  | 202  | 153  | 136  | 160  | 202  | 119  | 69   |
| AY058658.1 | DrosSpike7      | 35   | 22   | 34   | 23   | 33   | 21   | 27   | 35   | 35   | 33   | 31   | 35   |
| AF325032.2 | Athal_Spike_S17 | 35   | 116  | 55   | 55   | 91   | 82   | 119  | 98   | 62   | 61   | 47   | 46   |
| DQ412624   | SarsSpike3      | 11   | 11   | 13   | 15   | 20   | 12   | 14   | 20   | 16   | 15   | 9    | 14   |
| AY058658.1 | DrosSpike6      | 8    | 13   | 15   | 15   | 14   | 7    | 13   | 32   | 18   | 20   | 5    | 1    |
| AY058560.1 | DrosSpike10     | 5    | 8    | 8    | 9    | 12   | 2    | 9    | 8    | 10   | 14   | 2    | 4    |
| AY058658.1 | DrosSpike11     | 14   | 9    | 13   | 8    | 8    | 4    | 11   | 14   | 13   | 18   | 2    | 5    |
| AF325014.2 | Athal_Spike_S12 | 11   | 3    | 9    | 3    | 11   | 2    | 7    | 5    | 9    | 12   | 12   | 8    |
| AF325016.2 | Athal_Spike_S15 | 6    | 3    | 5    | 6    | 6    | 2    | 7    | 7    | 7    | 8    | 9    | 5    |
| AF325016.2 | Athal_Spike_S16 | 2    | 8    | 7    | 4    | 14   | 5    | 8    | 16   | 11   | 13   | 9    | 14   |
| AF325032.2 | Athal_Spike_S18 | 36   | 26   | 30   | 26   | 35   | 6    | 25   | 47   | 36   | 37   | 23   | 33   |
| AF324998.2 | Athal_Spike_S20 | 3    | 0    | 0    | 0    | 0    | 0    | 0    | 0    | 0    | 0    | 5    | 7    |
| AF324998.2 | Athal_Spike_S21 | 6    | 9    | 7    | 10   | 8    | 2    | 5    | 10   | 10   | 9    | 9    | 5    |
| AF324998.2 | Athal_Spike_S24 | 18   | 16   | 17   | 17   | 27   | 3    | 23   | 35   | 31   | 36   | 7    | 23   |
| DQ412624   | SarsSpike4      | 8    | 10   | 22   | 14   | 15   | 5    | 19   | 17   | 13   | 20   | 5    | 5    |
| AY058560.1 | DrosSpike9      | 8    | 5    | 11   | 9    | 10   | 1    | 6    | 15   | 6    | 12   | 2    | 3    |

**Supplemental Table 2.** Data from nCounter assays of AML samples and normal CD34+, promyelocytes, and neutrophils (PMNs).

| Accession No.  | Gene Name/Sample ID | PMNs   | PMNs   | PMNs   | PMNs   | Spike Only | Spike Only | Spike Only |
|----------------|---------------------|--------|--------|--------|--------|------------|------------|------------|
|                |                     | 109057 | 109583 | 109583 | 109583 |            |            |            |
| NM_002841.2    | PTPRG               | 9      | 4      | 6      | 2      | 0          | 0          | 0          |
| NM_145256.2    | LRRC25              | 208    | 198    | 159    | 180    | 1          | 0          | 0          |
| NM_001972.2    | ELA2                | 38     | 19     | 21     | 7      | 3          | 1          | 2          |
| NM_000597.2    | IGFBP2              | 12     | 3      | 4      | 10     | 1          | 4          | 0          |
| NM_005413.1    | SIX3                | 40     | 26     | 35     | 22     | 0          | 0          | 1          |
| NM_006272.1    | S100B               | 6      | 1      | 6      | 0      | 1          | 2          | 1          |
| NM_003327.2    | TNFRSF4             | 5      | 3      | 2      | 8      | 1          | 0          | 1          |
| NM_004049.2    | BCL2A1              | 2420   | 1615   | 1554   | 1612   | 2          | 1          | 1          |
| NM_001911.2    | CTSG                | 49     | 46     | 38     | 35     | 0          | 0          | 0          |
| NM_001557.2    | IL8RB               | 1803   | 1273   | 1220   | 1311   | 1          | 1          | 1          |
| NM_001066.2    | TNFRSF1B            | 1257   | 768    | 788    | 720    | 3          | 5          | 1          |
| NM_002046.3    | GAPDH               | 2588   | 1269   | 1124   | 1213   | 1          | 1          | 0          |
| NM_006169.2    | NNMT                | 11     | 10     | 8      | 7      | 0          | 1          | 1          |
| NM_015381.3    | FAM19A5             | 4      | 6      | 4      | 3      | 0          | 1          | 0          |
| NM_015136.2    | STAB1               | 4      | 6      | 6      | 3      | 1          | 1          | 0          |
| NM_002029.3    | FPR1                | 2391   | 1342   | 1274   | 1345   | 0          | 2          | 1          |
| NM_003930.3    | SCAP2               | 43     | 82     | 43     | 66     | 0          | 0          | 0          |
| NM_006486.2    | FBLN1               | 2      | 4      | 2      | 0      | 0          | 0          | 0          |
| NM_153206.1    | AMICA1              | 20     | 7      | 5      | 20     | 1          | 1          | 1          |
| NM_002965.2    | S100A9              | 14408  | 10883  | 9845   | 10712  | 0          | 0          | 1          |
| NM_021209.3    | CARD12/NLRC4        | 37     | 22     | 19     | 22     | 1          | 0          | 1          |
| NM_000433.2    | NCF2                | 2364   | 1581   | 1531   | 1616   | 0          | 1          | 2          |
| NM_003489.2    | NRIP1               | 21     | 11     | 2      | 15     | 0          | 0          | 0          |
| NM_001040084.1 | LOC653107/ANXA8     | 12     | 8      | 7      | 5      | 1          | 0          | 0          |
| NM_016582.1    | SLC15A3             | 139    | 100    | 74     | 94     | 0          | 0          | 0          |
| NM_000211.2    | ITGB2               | 1466   | 753    | 687    | 670    | 1          | 1          | 0          |
| NM_000601.4    | HGF                 | 14     | 8      | 12     | 19     | 0          | 0          | 1          |
| NM_001042729.1 | FGR                 | 2483   | 1530   | 1615   | 1518   | 3          | 4          | 1          |
| NM_001614.2    | ACTG1               | 2889   | 1479   | 1383   | 1486   | 0          | 0          | 0          |
| NM_138444.2    | KCTD12              | 44     | 17     | 18     | 19     | 0          | 1          | 0          |
| NM_002964.3    | S100A8              | 29862  | 18679  | 17602  | 18700  | 1          | 0          | 0          |
| NM_001025109.1 | CD34                | 2      | 3      | 4      | 0      | 5          | 8          | 7          |
| NM_000474.3    | TWIST1              | 20     | 8      | 11     | 12     | 1          | 2          | 1          |
| NM_015869.3    | PPARG               | 31     | 11     | 11     | 17     | 0          | 0          | 0          |
| NM_004666.1    | VNN1                | 30     | 59     | 57     | 56     | 0          | 0          | 0          |
| NM_005874.1    | LILRB2              | 663    | 369    | 335    | 367    | 0          | 1          | 0          |
| NM_001005463.1 | EBF3                | 10     | 4      | 4      | 2      | 3          | 4          | 1          |
| NM_152852.1    | MS4A6A              | 2      | 6      | 8      | 3      | 1          | 0          | 0          |

**Supplemental Table 2.** Data from nCounter assays of AML samples and normal CD34+, promyelocytes, and neutrophils (PMNs).

| Accession No. | Gene Name/Sample ID | PMNs   | PMNs   | PMNs   | PMNs   | Spike Only | Spike Only | Spike Only |
|---------------|---------------------|--------|--------|--------|--------|------------|------------|------------|
|               |                     | 109057 | 109583 | 109583 | 109583 |            |            |            |
| NM_000954.5   | PTGDS               | 0      | 0      | 1      | 0      | 0          | 0          | 0          |
| NM_000222.1   | KIT                 | 1      | 0      | 0      | 0      | 1          | 1          | 0          |
| NM_004961.3   | GABRE               | 14     | 11     | 12     | 12     | 2          | 2          | 1          |
| NM_007261.2   | CD300A              | 23     | 46     | 34     | 62     | 0          | 1          | 0          |
| NM_002115.1   | HK3                 | 41     | 46     | 33     | 22     | 0          | 0          | 1          |
| NM_023914.2   | P2RY13              | 736    | 488    | 437    | 456    | 3          | 4          | 3          |
| NM_033642.1   | FGF13               | 4      | 1      | 6      | 7      | 0          | 0          | 0          |

|            |                 |      |      |      |      |      |      |      |
|------------|-----------------|------|------|------|------|------|------|------|
| AF324996.2 | Athal_Spike_S23 | 1874 | 1840 | 1847 | 1875 | 1815 | 1882 | 1863 |
| AF325027.2 | Athal_Spike_S14 | 694  | 707  | 694  | 677  | 380  | 428  | 405  |
| AF325042.2 | Athal_Spike_S19 | 500  | 513  | 522  | 518  | 653  | 650  | 683  |
| AY058560.1 | DrosSpike8      | 191  | 183  | 157  | 197  | 180  | 179  | 180  |
| AF325027.2 | Athal_Spike_S13 | 69   | 79   | 72   | 81   | 192  | 141  | 135  |
| AF324998.2 | Athal_Spike_S22 | 85   | 102  | 109  | 84   | 154  | 133  | 152  |
| AY058658.1 | DrosSpike7      | 37   | 24   | 47   | 20   | 26   | 19   | 22   |
| AF325032.2 | Athal_Spike_S17 | 33   | 26   | 33   | 37   | 85   | 56   | 48   |
| DQ412624   | SarsSpike3      | 11   | 18   | 13   | 8    | 9    | 7    | 9    |
| AY058658.1 | DrosSpike6      | 4    | 7    | 6    | 2    | 5    | 4    | 3    |
| AY058560.1 | DrosSpike10     | 7    | 0    | 2    | 3    | 2    | 2    | 2    |
| AY058658.1 | DrosSpike11     | 2    | 1    | 1    | 3    | 3    | 4    | 3    |
| AF325014.2 | Athal_Spike_S12 | 9    | 3    | 4    | 3    | 3    | 4    | 5    |
| AF325016.2 | Athal_Spike_S15 | 10   | 3    | 1    | 3    | 3    | 2    | 1    |
| AF325016.2 | Athal_Spike_S16 | 2    | 3    | 2    | 0    | 8    | 7    | 5    |
| AF325032.2 | Athal_Spike_S18 | 19   | 12   | 15   | 8    | 2    | 2    | 1    |
| AF324998.2 | Athal_Spike_S20 | 2    | 0    | 6    | 3    | 0    | 0    | 0    |
| AF324998.2 | Athal_Spike_S21 | 4    | 1    | 5    | 8    | 4    | 2    | 2    |
| AF324998.2 | Athal_Spike_S24 | 8    | 3    | 9    | 15   | 1    | 1    | 0    |
| DQ412624   | SarsSpike4      | 6    | 8    | 7    | 2    | 10   | 8    | 3    |
| AY058560.1 | DrosSpike9      | 3    | 1    | 2    | 2    | 1    | 3    | 2    |

**Supplemental Table 3.** Detailed sequence information for nCounter CodeSet target regions, capture probes and reporter probes for 73 test (46) and control (28) genes.

| Gene Symbol | Target-NSID         | Reporter Probe Sequence                              |
|-------------|---------------------|------------------------------------------------------|
| ACTG1       | NM_001614.2:1615    | CCACGGTGTCTGGCCAAAGACATCAGCTAAGAAAGGAAACTGGGTCTTA    |
| AMICA1      | NM_153206.1:125     | CTTTGCCATCAGCTTTCCAGCCTCTAGGTGCTTCACACAGG            |
| ANXA8       | NM_001040084.1:775  | GCAATTTTCTCATACTCTTCAAACACTCTCAGCAGGTGAGTGGCACTGCG   |
| BCL2A1      | NM_004049.2:80      | CTGGTGGAGAGCAAAGTCTTGAGCTGGCTCACCTTGAAGCTGTTGA       |
| CD300A      | NM_007261.2:0       | CTGCAGGTTCTTCGGCTATTTCTAGTGATGAGACCTCTCCC            |
| CD34        | NM_001025109.1:1580 | AGTTCTCCAGACCTTGGCTTTCCCCCGTCACACGTTTACCCAAAGAAGA    |
| CTSG        | NM_001911.2:160     | CAGGGTGACATTTATATTGCTTCCCAGCAATGAGCTGCTGTGACACACA    |
| EBF3        | NM_001005463.1:640  | CCAGCACGTGGCCGTCCACGTTGACTGTTGTGCGATACAACAACCTGGA    |
| ELA2        | NM_001972.2:195     | ACCACCCGCACCGCGCGGACGTTTACATTGCGCCACGCAGTG           |
| FAM19A5     | NM_015381.3:320     | CTCCAGACACGGAAGCATGTCACACCACTGCTTGGTC                |
| FBLN1       | NM_006486.2:1260    | GCTGGCACTCGTTGACATCGACACACATCCTGCTGATGCCGTCAAATAG    |
| FGF13       | NM_033642.1:620     | TTCAACAGCACCTGGAGGTAAGGTTCTGTTACAGAGCCCTTCTTTTGGCC   |
| FGR         | NM_001042729.1:440  | TATTGTTTCAAGATGTGGAACCTTCTCGCCCTTGGTGAAGGTGAGGTCATCC |
| FPR1        | NM_002029.3:350     | TGAGGGCGATCAGGAAGACACTTCCGAACAAGTTGATGTCCACTATGGTA   |
| GABRE       | NM_004961.3:65      | GACAACATCACGGAAGAGGCTTCACTTTGATTCACTGAGGTCCT         |
| GAPDH       | NM_002046.3:245     | ATCTCGCTCCTGGAAGATGGTGTGGGATTTCCATTGATGACAAGCTTCC    |
| HGF         | NM_000601.4:550     | AAGCTGTGTTCTGTGGTATCATGGAAGTCCAGGGCTGACATTTGATGCC    |
| HK3         | NM_002115.1:495     | GTCTGGTGACAAGGAAAGAGAAGCTGAAGCCAAGCTGCAGACCCTGTTT    |
| IGFBP2      | NM_000597.2:675     | CAAGGTGATGCTTGCCACCCTTGCCCATCTGCCGG                  |
| IL8RB       | NM_001557.2:2050    | CTGAAGTTTTGAGGAAAGCTGCCATACTGTCTTCTGCAGTGGTCACACCA   |
| ITGB2       | NM_000211.2:520     | CGGAGCAGGTCGCCACCTAGCTTCTTGACATTCCTGA                |
| KCTD12      | NM_138444.2:450     | CTGCAAGTCCCGCAGGTAATCCAGGATGTAGCGGAAGAGGAA           |
| KIT         | NM_000222.1:5       | AGATGGTTGAGAAGAGCCTGTCTGGACGCGAAGCAGTAGGAGCAGAACGC   |
| LILRB2      | NM_005874.1:595     | GGCTGGGAGTTCAGGCATTGTGGGTGTTTCTCTCTTCTTACACAG        |
| LRRC25      | NM_145256.2:115     | TCTGGTTTGCAGTCCCTGCACAGGTGCAAGTTCTAGAG               |
| MS4A6A      | NM_152852.1:65      | TCTCAGTCCCATCAACGTTTCTACTTACCTTCTTCTGAAAGTCATC       |
| NCF2        | NM_000433.2:160     | AGGGACATGATTAGGTAGAAACTAGGAGGCCAAGAGAGCTGCCAGGAGAC   |
| NLRC4       | NM_021209.3:840     | TGCCAGGTATATCCAGGAGTTGATCACAGAGGGTTTCAAAAAGTCCACCC   |
| NNMT        | NM_006169.2:605     | AAGCCAGGGAGTGACCCTGCAGAAGTTGTCTTCTCTGA               |
| NRIP1       | NM_003489.2:335     | CCTGATCCCCCTGCTGCCTGATGCATTAGTAATCCTTCTAGGTAAGTTAA   |
| P2RY13      | NM_023914.2:2385    | AGGTAAGGCCAGAAAGGTAGGCAAGTTCTAGGGCCTTTGAGGCCATGGAA   |
| PPARG       | NM_015869.3:1035    | AAAACCAGGAATGCTTTTGGCATACTCTGTGATCTCCTGCACAGCCTCCA   |
| PTGDS       | NM_000954.5:180     | TGGACAACGCCGCTTCTTCTCCCGGAGCCAGCTC                   |
| PTPRG       | NM_002841.2:0       | CCTGAAAGTTGTGGCTCCGGCGCAGGCTGGGAAGGAAC               |
| S100A8      | NM_002964.3:115     | AGACGTCTGCACCCTTTTCTGATATACTGAGGACACTCGGTCTCTAGC     |
| S100A9      | NM_002965.2:75      | CTTTGAATTTCCCTGGTTCAGGGTGTCTGGGTGC                   |
| S100B       | NM_006272.1:40      | CCCTCCCTTCCAGAATATTGGTGGAAAACGTCGATGAGGGCCACCATGGC   |
| SCAP2       | NM_003930.3:1270    | AATATCATACATCTCCATTATGTAGGCTTTAGGCACCAAGCCAATGGCTC   |
| SIX3        | NM_005413.1:1305    | GCGGCCTTGGCTATCATACATCACATTCCGAGTCGCTGG              |
| SLC15A3     | NM_016582.1:820     | CAGCAGGAAGCTGATGTTCTGCTGAATAAACGCCACCACCAGCAGCGA     |

| <b>Gene Symbol</b> | <b>Target-NSID</b> | <b>Reporter Probe Sequence</b>                      |
|--------------------|--------------------|-----------------------------------------------------|
| STAB1              | NM_015136.2:95     | GAGTGACAAACGTGGTTTTTCACATCACAGCCTTTGAACAGCACCTGCCCC |
| TNFRSF1B           | NM_001066.2:835    | GACACAGTTCACCACTCCTATTATTAGTAGACCCAAGGCTGTCACACCCA  |
| TNFRSF4            | NM_003327.2:200    | CACTCCCACTTCTGAGGTTACACCACGTGCAGGGC                 |
| TWIST1             | NM_000474.3:35     | AAAAAGAAAGCGCCCAACGGCTGGACGCACACCCCGCCAGGCC         |
| VNN1               | NM_004666.1:195    | GGGTAGAGAGAGTCCCTGTTGAAGTTCCAGCCATAAATAGCATCTTCTGG  |



| Gene Symbol | Capture Probe Sequence                               |
|-------------|------------------------------------------------------|
| ACTG1       | CGGCTTGGACTTTCCAACCCTGACAGACCCGCAAGACAAAACAACTGGTT   |
| AMICA1      | GACCCCTGCCATTATCTCTATGTTGCTCAAGCAATTTGAGCGGTCACT     |
| ANXA8       | CGTGCACAGGATGGTGTATGAATTCATCTCATCAGTCCCACGAATCTTCT   |
| BCL2A1      | GGCAATGTGCTGAGAATGCTCACTGAGCTTGACTGAGTTATGACACATGA   |
| CD300A      | TGTAGTGACTCCGTAGCTTGCAGGACTGATCCCCG                  |
| CD34        | CCAGAGTCTGGCTCCAGGGAGCCGAATGTGTAAGGACAGGAGTTTAC      |
| CTSG        | AAGTCTTCTCGCACCAGGAACCCTCCACATCTGCT                  |
| EBF3        | ATCTCCGCATATCTCGAGGGTTGCCTGCATTCTTCAAACAGTTCTGATTG   |
| ELA2        | CGCGGCCGACATGACGAAGTTGGGCGCAATCAGGGTGCG              |
| FAM19A5     | TTGATGATTCTTGCCTCCACACAGGCGGGCCGGGCT                 |
| FBLN1       | TAACCCGTCTTGCATTTCGACGCGAAACTGCCGGGAGAGTTCACGCAGCG   |
| FGF13       | TCACTGGCTACGTTGATTCAATTGTGGCTCATGGATTTGCCTCCGTTCCAGC |
| FGR         | TCAGTTCGAGCCTCATAGTCATACAGGGCAATGAACAGGGTCAC         |
| FPR1        | AAGACGAATTTGCACAGGAACCAGCCGAAAGGCCAATGTCCTCCCATGGC   |
| GABRE       | CGACCCTCGACTGGAGGATCAATAAGATGCCTAGGAGGACTGGAAGAACT   |
| GAPDH       | CGTTCTCAGCCTTGACGGTGCCATGGAATTTGCCATGGGTGGAATCATAT   |
| HGF         | ACTCTTAGTGATAGATACTGTTCCCTTGTAGCTGCGTCCTTTACCAATGA   |
| HK3         | GTTACACAGGCTGCGCATCCAGGAACCTCAGACAGGC                |
| IGFBP2      | TGCTGCTCAGTGACCTTCTCCCGAACACGGCCAG                   |
| IL8RB       | TTTTACAATCCCCCCAGCAACGCTCGAGAGTTCCAGTTTCTCCTCTACA    |
| ITGB2       | GGTCATCAAGCATGGAGTAGGAGAGGTCCATCAGATAGTAC            |
| KCTD12      | GCCGTCCCGGTCCAGAAAGAAGCGGCCTTTGCTGT                  |
| KIT         | AGAGAAAATCCCAGGCGCCGCGAGCGCCTCTCATCG                 |
| LILRB2      | AATGAAGCCGCCAAATGCCACCTGTGACTCACACTGGAGGGTCACCCTTC   |
| LRRC25      | CCTCAGTCCTACCTTTTGGGTCCCCTGACCAGCTTTTG               |
| MS4A6A      | AGCCCTTCCTTATTCCAGTGTTTACAGCTATACAGGATGTGATACTCACA   |
| NCF2        | AGAGAGAAGACAGGTTGGAGCGTCTCCCCTAGCAG                  |
| NLRC4       | TGGGCCCTGCTGAGACGGAGGAAGAAGACGAATTTGAACTTGGTCAGAGC   |
| NNMT        | GTCTCAGGCTAACAGCATTCTTCCATCAGTTCAGCCCTTCTTTTAGAAC    |
| NRIP1       | AACAATAGAATCCTGGTGCACATCAGAGCCAAGCTCTTCTCCATGAGTCA   |
| P2RY13      | GAAAACGTGGGCTTACCCTACGATGGTCGTGTTGGAGCTCGTGG         |
| PPARG       | CGGAGCGAAACTGGCAGCCCTGAAAGATGCGGATGGCCACCTCTTTG      |
| PTGDS       | GAGTTGGAGGCGAGGCCCGCGCTGAACCAGCGCCC                  |
| PTPRG       | GAAGAGCGCGGCGCTGGAAACTGGCCATGCCTCCATACAGGAAGTAACAT   |
| S100A8      | AATTTCTTCAGGTCATCCCTGTAGACGGCATGGAAATCCCCTTTATCAG    |
| S100A9      | CCCAGTTCACAGAGTATTGGTGGAAGGTGTTGATGATGGTCTCTATGTT    |
| S100B       | CTTCTCCAGCTCAGACATCCTCTTCTTGTCTCAC                   |
| SCAP2       | CCTTCATTTCTCCTACCCACCAGCCATATCTATTGTATTCTTGCTAAGA    |
| SIX3        | AGGTTACCGAGAGGATGGAGGTGCCGGTGTCCGCG                  |
| SLC15A3     | CAGCACAGCACCCAGGTTGATGCTCCAGTAAAACCAGTTGAAGAAGCGGC   |

| <b>Gene Symbol</b> | <b>Capture Probe Sequence</b>                   |
|--------------------|-------------------------------------------------|
| STAB1              | CTGACGAAGCTGAAGCCTGCCAGGCAGAAGGCCAG             |
| TNFRSF1B           | CAATCAGTCCAACCTGGAAGAGCGAAGTCGCCAGTGCTCCCTT     |
| TNFRSF4            | TTGCACGGCTTGGAGCTGACCACGTCGTTGTAGAAGCCCGG       |
| TWIST1             | TCCTGGAAACGGTGCCGGTGCTGCAGAGCCCGCGA             |
| VNN1               | AGTCACAATAATATGCGCACCCCTGATCTGCTGCTGATGTGATCGCT |

| Gene Symbol | Target Region Sequence                                                                                |
|-------------|-------------------------------------------------------------------------------------------------------|
| ACTG1       | AACCAGTTGTTTTGTCTTGCGGGTCTGTCAGGGTTGAAAGTCCAAGCCGTAGGACCCAGTTTCCTTTCTTAGCTGATGTCTTTGGCCAGAACACCGTGG   |
| AMICA1      | AGTGACCCGCTCGAAATTGCTTGAGCAACATAGAGATAATGGGCAGGGTCCCTGTGTGAAGCACCTAGAGGCTGGAAAGCTGATGGCAAAGCTGGAGGGG  |
| ANXA8       | AGAAGATTCGTGGGACTGATGAGATGAAATTCATCACCATCCTGTGCACGCGCAGTGCCACTCACCTGCTGAGAGTGTGTAAGAGTATGAGAAAATTGC   |
| BCL2A1      | TCATGTGTCATAACTCAGTCAAGCTCAGTGAGCATTCTCAGCACATTGCCTCAACAGCTTCAAGGTGAGCCAGCTCAAGACTTTGCTCTCCACCAGGCAG  |
| CD300A      | CGGGGAAGTGAGAGTCTGGGGATCAGTCTGCAAGCTACGGAGTCACTACAGGGAGAGGTCTCATCACTAGAAATAGCCGAAGAACCTGCAGCCTCAACCA  |
| CD34        | AGGTAAACTCCTGTCTTTACACATTTCGGCTCCCTGGAGCCAGACTCTGGTCTTCTTTGGGTAAACGTGTGACGGGGGAAAGCCAAGGTCTGGAGAAGCT  |
| CTSG        | AGTCCAGCAGGTGAGAGCAGATGTGGAGGGTTCCTGGTGCAGAGACTTTGTGCTGACAGCAGCTCATTGCTGGGGAAGCAATATAAATGTCACCCTGG    |
| EBF3        | CAATCAGAACTGTTTGAAGAATGCAGGCAACCCTCGAGATATGCGGAGATTCCAGGTTGTTGTATCGACAACAGTCAACGTGGACGGCCACGTGCTGGCC  |
| ELA2        | ACTTCTGCGGCGCCACCCTGATTGCGCCCAACTTCGTCATGTCGGCCGCGCACTGCGTGGCGAATGTAACGTCCGCGCGGTGCGGGTGGTCTCTGGGAGC  |
| FAM19A5     | GCCGGCACCACGAGAGCCCGGCCCGCTGTGTGGACGCAAGAATCATCAAGACCAAGCAGTGGTGTGACATGCTTCCGTGTCTGGAGGGGAAAGGCTGCG   |
| FBLN1       | CGCTGCGTGAACCTCTCCCGCAGTTTCCGCTGCGAATGCAAGACGGGTACTATTTGACGGCATCAGCAGGATGTGTGTCGATGTCAACGAGTGCCAGC    |
| FGF13       | GCTGAACGGAGGCAAATCCATGAGCCACAATGAATCAACGTAGCCAGTGAGGGCAAAGAAGGGCTCTGTAACAGAACCTTACCTCCAGGTGCTGTTGAA   |
| FGR         | ATTGGGGTGACCCTGTTCAATTGCCCTGTATGACTATGAGGCTCGAACTGAGGATGACCTCACCTTCACCAAGGGCGAGAAGTCCACATCCTGAACAATA  |
| FPR1        | GCCATGGGAGGACATTGGCCTTTCGGCTGGTTCCTGTGCAAATTCGTCCTTACCATAGTGGACATCAACTTGTTCGGAAGTGTCTTCTGATCGCCCTCA   |
| GABRE       | AGTTCCTCCAGTCTCCTAGGCATCTTATTGATCCTCCAGTCGAGGGTTCGAGGGACCTCAGACTGAATCAAAGAATGAAGCCTCTTCCCGTGATGTTGTC  |
| GAPDH       | ATATGATTCCACCCATGGCAAATTCATGGCACCGTCAAGGCTGAGAACGGGAAGCTTGTATCAATGAAATCCCATCACCATCTTCCAGGAGCGAGAT     |
| HGF         | TCATTGGTAAAGGACGCAGCTACAAGGGAACAGTATCTATCACTAAGAGTGGCATCAAATGTCAGCCCTGGAGTTCATGATACCACACGAACACAGCTT   |
| HK3         | ACTTTGCTGCCCACTGCCTGTCTGAGTTCTTGATGCGCAGCCTGTGAACAAACAGGGTCTGCAGCTTGGCTTCAGCTTCTCTTCCCTTGTACCAGAC     |
| IGFBP2      | TCGGGTATGAAGGAGCTGGCCGTGTTCCGGGAGAAGGTCAGTGCAGCAGCACCGGCAGATGGGCAAGGGTGGCAAGCATCACCTTGGCCTGGAGGAGCCCA |
| IL8RB       | TGTAGAGGAGAACTGAACTCTCGAGCGTTGCTGGGGGGATTGTAATAAGTGTGACCACTGCAGAAGACAGTATGGCAGCTTTCCTCAAAACTTCAG      |
| ITGB2       | CATCGACCTGTACTATCTGATGGACCTCTCCTACTCCATGCTTGTGACCTCAGGAATGTCAAGAAGCTAGGTGGCGACCTGCTCCGGGCCCTCAACGAG   |
| KCTD12      | AGGAGCTGGCCCGGACAGCAAAGGCCGCTTCTTCTGGACCGGGACGGCTTCTCTTCCGCTACATCCTGGATTACCTGCGGGACTTGCAGCTCGTGCT     |
| KIT         | CATCGCAGCTACCGCGATGAGAGGCGCTCGCGGCGCCTGGGATTTCTCTGCGTTCTGCTCCTACTGCTTCGCGTCCAGACAGGCTCTTCTCAACCATCT   |
| LILRB2      | GAAGGGTGACCCCTCCAGTGTGAGTCACAGGTGGCATTGGCGGCTCATTCTGTGTAAGGAAGGAGAAGATGAACACCCACAATGCCTGAACCTCCAGCC   |
| LRRC25      | CATCGCAGAGGCAAAGCGTGGCAGTGGGACCCAAAAGGTAGGACTGAGGCTCTAGAACTTGCACCTGTGCAGGGACTGCAAACCAGACCTGGGAGGACC   |
| MS4A6A      | TGTGAGTATCACATCCTGTATAGCTGTAACACTGGAATAAGGAAGGGCTGATGACTTTCAGAAGATGAAGGTAAGTAGAAACCGTTGATGGGACTGAGA   |
| NCF2        | GCCACTAAGGCAGCCCTGCTAGGGGAGACGCTCCAACCTGTCTTCTCTGTCTCCTGGCAGCTCTTGGCCTCCTAGTTTCTACCTAATCATGTCCCT      |
| NLRC4       | GCTCTGACCAAGTTCAAATTCGTCTTCTTCTCCGTCTCAGCAGGGCCAGGGTGGACTTTTTGAAACCCCTCTGTGATCAACTCCTGGATATACCTGGCA   |
| NNMT        | GTTCTAAAAGAAGGGCTGAACTGATGGAAGGAATGCTGTTAGCCTGAGACTCAGGAAGACAATTCTGCAGGGTCACTCCCTGGCTTCTGGAGGAAAGAG   |
| NRIP1       | TGACTCATGGAGAAGAGCTTGGCTCTGATGTGCACCAGGATTCTATTGTTTTAACTTACCTAGAAGGATTACTAATGCATCAGGCAGCAGGGGGATCAGG  |
| P2RY13      | ATGTGCCACGAGCTCCAACACGACCATCGTAGGGTGAAGCCACGTTTTCTTCCATGGCCTCAAAGGCCCTAGAACTTGCCTACCTTTCTGGCCTTACCT   |
| PPARG       | GAGCAAAGAGGTGGCCATCCGCATCTTTCAGGGCTGCCAGTTTCGCTCCGTGGAGGCTGTGCAGGAGATCACAGAGTATGCCAAAAGCATTCTGGTTTT   |
| PTGDS       | CAGGACAAGTTCCTGGGGCGCTGGTTCAGCGCGGGCCTCGCTCCAACCTCGAGCTGGCTCCGGGAGAAGAAGGCGGCGTTGTCCATGTGCAAGTCTGTGG  |
| PTPRG       | ATGTTACTTCTGTATGGAGGCATGGCCAGTTTCCAGCGCCGCGCTTCTCGTTCTTCCAGCCTGCGCCGAGCCACAACCTTTCAGGAGCATGGACTGA     |
| S100A8      | CTGATAAAGGGGAATTTCCATGCCGTCTACAGGGATGACCTGAAGAAATGCTAGAGACCGAGTGTCTCAGTATATCAGGAAAAAGGGTGCAGACGTCT    |
| S100A9      | AACATAGAGACCATCATCAACACCTTCCACCAATACTCTGTGAAGCTGGGGCACCCAGACACCCTGAACCAGGGGGAATTCAAAGAGCTGGTGCGAAAAG  |
| S100B       | GGAGACCAGGAAGGGGTGAGACAAGGAAGAGGATGTCTGAGCTGGAGAAGGCCATGGTGGCCCTCATCGACGTTTTCCACCAATATTCTGGAAGGGAGGG  |
| SCAP2       | TCTTAGCAAGGAATACAATAGATATGGCTGGTGGGTAGGAGAAATGAAGGGAGCCATTGGCTTGGTGCCTAAAGCCTACATAATGGAGATGTATGATATT  |
| SIX3        | CAGCCTGACGGAGCGCGGACACCGGCACCTCCATCCTCTCGGTAACCTCCAGCGACTCGGAATGTGATGTATGATAGCCAAGGCCGCCCTCCTCCCTC    |
| SLC15A3     | GCCGCTTCTCAACTGGTTTTACTGGAGCATCAACCTGGGTGCTGTGCTGTCGCTGCTGGTGGTGGCGTTTATTACGCAGAACATCAGCTTCTGCTGGG    |

| <b>Gene Symbol</b> | <b>Target Region Sequence</b>                                                                        |
|--------------------|------------------------------------------------------------------------------------------------------|
| STAB1              | CTCCCACTCTGCCTCCTGGCCTTCTGCCTGGCAGGCTTCAGCTTCGTCAGGGGGCAGGTGCTGTTCAAAGGCTGTGATGTGAAAACCACGTTTGTCACTC |
| TNFRSF1B           | CCCAGCTGAAGGGAGCACTGGCGACTTCGCTCTTCCAGTTGGACTGATTGTGGGTGTGACAGCCTTGGGTCTACTAATAATAGGAGTGGTGAAGTGTGTC |
| TNFRSF4            | CCGTGCGGGCCGGGCTTCTACAACGACGTGGTCAGCTCCAAGCCGTGCAAGCCCTGCACGTGGTGTAACTCAGAAGTGGGAGTGAGCGGAAGCAGCTGT  |
| TWIST1             | CAACTCCCAGACACCTCGCGGGCTCTGCAGCACCGGCACCGTTTCCAGGAGGCCTGGCGGGGTGTGCGTCCAGCCGTTGGGCGCTTTCTTTTTGGACCTC |
| VNN1               | AAGGAGCGATCACATCAGCAGCAGATCAGGGTGCGCATATTATTGTGACTCCAGAAGATGCTATTTATGGCTGGAAGTTCAACAGGGACTCTCTTACCC  |
